# Supplementary material for: FeF3-catalyzed MCR in PEG-400: ultrasound assisted synthesis of N-substituted 2-aminopyridines
Source: Royal Society of Chemistry journal article supplement (doi:10.1039/c6ra14228a), 2016-01-01

**FeF<sub>3</sub>-catalyzed MCR in PEG-400: ultrasound assisted synthesis of *N*-substituted 2-aminopyridines**

Dinne Naresh Kumar Reddy,<sup>a,b</sup> Kothapalli Bannoth Chandrasekhar,<sup>b</sup> Yaddanapudi Sesha Siva Ganesh,<sup>a</sup> G. Rajeshwar Reddy,<sup>a</sup> J. Pradeep Kumar,<sup>a</sup> Ravi Kumar Kapavarapu<sup>c</sup> and Manojit Pal<sup>d,\*</sup>

<sup>a</sup>*Custom Pharmaceuticals Services and Dr. Reddy's Laboratories Ltd, Bollaram Road, Miyapur, Hyderabad 500049; India.*

<sup>b</sup>*College of Engineering, JNTU, Anantapur 533 003, Andhra Pradesh, India.*

<sup>c</sup>*Doctoral Programme in Experimental Biology and Biomedicine, Center for Neuroscience and Cell Biology, University of Coimbra, 3004-517 Coimbra, Portugal.*

<sup>d</sup>*Dr. Reddy's Institute of Life Sciences, University of Hyderabad Campus, Gachibowli, Hyderabad 500046, India.*

E-mail: manojitpal@rediffmail.com

**General methods:** Unless stated otherwise, solvents and chemicals were obtained from commercial sources and were used without further purification. Reactions were monitored by thin layer chromatography (TLC) on silica gel plates (60 F254), visualizing with ultraviolet light or iodine spray. Flash chromatography was performed on silica gel (100-200 mesh) using hexane and ethyl acetate. <sup>1</sup>H and <sup>13</sup>C NMR spectra were determined in CDCl<sub>3</sub> solution by using 400 or 100 MHz spectrometers, respectively. Proton chemical shifts ( $\delta$ ) are relative to tetramethylsilane (TMS,  $\delta = 0.00$ ) as internal standard and expressed in ppm. Spin multiplicities are given as s (singlet), d (doublet), t (triplet) and m (multiplet) as well as b (broad). Coupling constants ( $J$ ) are given in hertz. Infrared spectra were recorded on a FT-IR spectrometer. Melting points were determined using melting point B-540 apparatus and are uncorrected. HRMS was determined using waters LCT premier XETOF ARE-047 apparatus. Reactions were performed using a laboratory ultrasonic bath Bandelin SONOREX™ SUPER RK 514 BH model producing irradiation of 35 kHz.

**Typical procedure for the synthesis of 5a:** To a mixture of acetophenone (**1a**, 150 mg, 1.25 mmol), benzaldehyde (**2a**, 130mg, 1.25 mmol), *o*-toluidine (**3a**, 134 mg, 1.25 mmol), and malononitrile (**4**, 82 mg, 1.25 mmol) in PEG-400 (0.3 mL) was added FeF<sub>3</sub> (14.1mg, 10 mol%) at room temperature. The mixture was then stirred at 60 °C under ultrasound irradiation in open air for 3h (the reaction was monitored by TLC). After completion of the reaction the mixture was diluted with EtOAc (10 mL) and washed with cold water (2 x 5 mL). The organic layer was collected, dried over anhydrous Na<sub>2</sub>SO<sub>4</sub>, filtered and concentrated under low vacuum. The residue was purified by column chromatography over silica gel (100-200 mesh) using EtOAc-hexane to give the desired product.

**Table S-1.** Ultrasound assisted synthesis of *N*-substituted 2-aminopyridines (**5**) via FeF<sub>3</sub> catalyzed MCR.

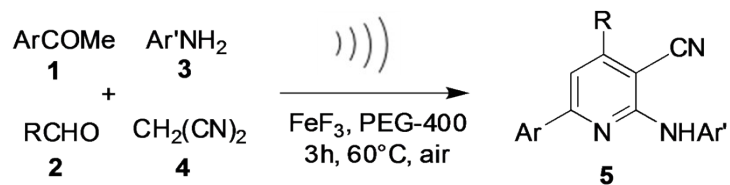

| Entry | Acetophenone<br>( <b>1</b> ) | Aldehyde<br>( <b>2</b> )              | Aniline<br>( <b>3</b> )              | Product<br>( <b>5</b> )                                                                           | Yield<br>(%) |
|-------|------------------------------|---------------------------------------|--------------------------------------|---------------------------------------------------------------------------------------------------|--------------|
| 1     | Acetophenone<br><b>1a</b>    | Bezaldehide<br><b>2a</b>              | <i>o</i> -Toludine<br><b>3a</b>      | 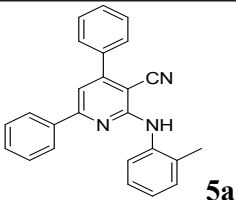<br><b>5a</b>   | 92           |
| 2     | <b>1a</b>                    | <b>2a</b>                             | Aniline<br><b>3b</b>                 | <br><b>5b</b>   | 90           |
| 3     | <b>1a</b>                    | <b>2a</b>                             | 2,3-Dimethyl<br>aniline<br><b>3c</b> | <br><b>5c</b>  | 92           |
| 4     | <b>1a</b>                    | 4-Methoxy<br>bezaldehide<br><b>2b</b> | 4-Flouro<br>aniline<br><b>3d</b>     | <br><b>5d</b> | 89           |
| 5     | <b>1a</b>                    | Thiophene-2-<br>aldehyde<br><b>2c</b> | <b>3b</b>                            | <br><b>5e</b> | 90           |

|    |                                        |                                        |                                          |                                                                                                   |    |
|----|----------------------------------------|----------------------------------------|------------------------------------------|---------------------------------------------------------------------------------------------------|----|
| 6  | <b>1a</b>                              | Isovaleraldehyde<br><b>2d</b>          | <b>3a</b>                                | 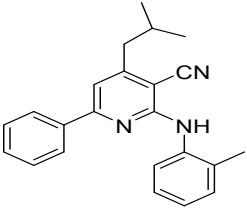<br><b>5f</b>   | 88 |
| 7  | 4-Methoxy<br>acetophenone<br><b>1b</b> | <b>2a</b>                              | <b>3a</b>                                | <br><b>5g</b>   | 89 |
| 8  | <b>1a</b>                              | <b>2d</b>                              | <b>3b</b>                                | <br><b>5h</b>   | 90 |
| 9  | <b>1a</b>                              | 4-Nitro<br>benzaldehyde<br><b>2e</b>   | <b>3b</b>                                | <br><b>5i</b>  | 92 |
| 10 | <b>1a</b>                              | 4-Methoxy<br>benzaldehyde<br><b>2b</b> | 4-Cyano<br>aniline<br><b>3e</b>          | <br><b>5j</b> | 87 |
| 11 | <b>1a</b>                              | <b>2c</b>                              | 4-Bromo<br>aniline<br><b>3f</b>          | <br><b>5k</b> | 89 |
| 12 | 4-Chloro<br>acetophenone<br><b>1c</b>  | <b>2a</b>                              | 2,3-<br>Dimethyl<br>aniline<br><b>3c</b> | <br><b>5l</b> | 90 |

|    |                                         |                                      |                                          |                                                                                                   |    |
|----|-----------------------------------------|--------------------------------------|------------------------------------------|---------------------------------------------------------------------------------------------------|----|
| 13 | <b>1a</b>                               | 4-Bromo<br>benzaldehyde<br><b>2f</b> | <b>3a</b>                                | 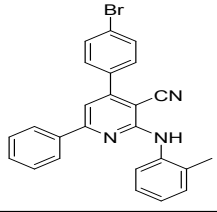<br><b>5m</b>   | 86 |
| 14 | <b>1a</b>                               | Furan-2-aldehyde<br><b>2g</b>        | <b>3a</b>                                | <br><b>5n</b>   | 85 |
| 15 | 4-Cyano<br>acetophenone<br><b>1d</b>    | <b>2a</b>                            | <b>3c</b>                                | <br><b>5o</b>   | 91 |
| 16 | <b>1a</b>                               | <i>Butyraldehyde</i><br><b>2h</b>    | <b>3c</b>                                | <br><b>5p</b>  | 85 |
| 17 | 1-(Furan-2-<br>yl)ethanone<br><b>1e</b> | <b>2a</b>                            | <b>3a</b>                                | <br><b>5q</b> | 51 |
| 18 | <b>1c</b>                               | <b>2a</b>                            | <i>n</i> -BuNH <sub>2</sub><br><b>3g</b> | <br><b>7</b>  | 50 |

## Spectral data

### 4,6-Diphenyl-2-(*o*-tolylamino)nicotinonitrile (5a)

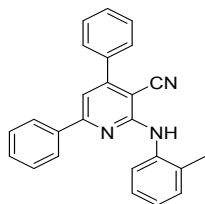

Off white solid, mp:194-196 °C; <sup>1</sup>H NMR (400 MHz, CDCl<sub>3</sub>): δ 8.13 (d, *J* = 7.6 Hz, 1H), 8.03-8.00 (m, 2H), 7.69-7.66 (m, 2H), 7.58-7.52 (m, 3H), 7.46-7.43 (m, 3H), 7.33-7.27 (m, 4H), 7.14 (t, *J* = 7.2 Hz, 1H), 2.40 (s, 3H); <sup>13</sup>C NMR (100 MHz, CDCl<sub>3</sub>):δ 159.6, 156.6, 153.1, 148.3, 143.1, 138.3, 137.4, 130.6, 130.2, 129.8, 129.0 (2C), 128.7 (2C), 128.2 (2C), 127.3 (2C), 126.5, 124.3 (2C), 122.7, 111.1, 89.5, 18.0; IR (KBr, cm<sup>-1</sup>): 3334, 2963, 2214, 1601, 1582, 1491; HRMS (ESI) ([*M*]<sup>+</sup>) calcd for C<sub>25</sub>H<sub>20</sub>N<sub>3</sub>O: 362.1657, found: 362.1669.

### 4,6-Diphenyl-2-(phenylamino)nicotinonitrile (5b)

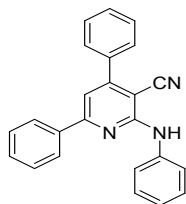

Pale yellow solid, mp: 213-215°C; <sup>1</sup>H NMR (400 MHz, CDCl<sub>3</sub>): δ 8.08 (dd, *J*<sub>1,2</sub> = 2.4 Hz, *J*<sub>1,3</sub> = 8.0 Hz, 2H), 7.77 (d, *J* = 7.2 Hz, 2H), 7.67-7.65 (m, 2H), 7.57-7.47 (m, 6H), 7.43 (t, *J* = 7.6 Hz, 2H), 7.33 (s, 1H), 7.27-7.26 (m, 1H), 7.16 (t, *J* = 7.6 Hz, 1H); <sup>13</sup>C NMR (100 MHz, CDCl<sub>3</sub>):δ 158.9, 156.5, 155.4, 138.9, 137.8, 136.9, 130.3, 129.9, 128.9 (2C), 128.9 (2C), 128.8(2C), 128.1 (2C), 127.4(2C), 123.5, 120.5 (2C), 117.0, 111.4, 90.0; IR (KBr, cm<sup>-1</sup>): 3335, 2215, 1602, 1582, 1497; HRMS (ESI) ([*M*]<sup>+</sup>) calcd for C<sub>24</sub>H<sub>18</sub>N<sub>3</sub>: 348.1501, found: 348.1514.

### 2-((2,3-Dimethylphenyl)amino)-4,6-diphenylnicotinonitrile (5c)

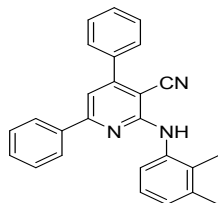

Off white solid, mp: 172-174°C; <sup>1</sup>H NMR (400 MHz, CDCl<sub>3</sub>): δ 7.99 – 7.95 (m, 2H), 7.80 (d, *J* =

8.0Hz, 1H), 7.69-7.65 (m, 2H), 7.57-7.51 (m, 3H), 7.43-7.40 (m, 3H), 7.29 (s, 1H), 7.22 (t,  $J = 8.0$  Hz, 1H), 7.09-7.05 (m, 2H), 2.37 (s, 3H), 2.28 (s, 3H);  $^{13}\text{C}$  NMR (100 MHz,  $\text{CDCl}_3$ ): $\delta$  158.8, 157.4, 155.3, 137.8, 137.4, 137.1, 136.8, 130.1, 129.8, 129.6, 128.9 (2C), 128.7 (2C), 128.2 (2C), 127.3 (2C), 126.6, 125.5, 121.8, 117.2, 110.8, 89.5, 20.7, 14.0; IR (KBr,  $\text{cm}^{-1}$ ): 3395, 2965, 2209, 1603, 1586, 1447; HRMS (ESI) ( $[\text{M}]^+$ ) calcd for  $\text{C}_{26}\text{H}_{22}\text{N}_3$ : 376.1814, found: 376.1801.

### 2-((4-Fluorophenyl)amino)-4-(4-methoxyphenyl)-6-phenylnicotinonitrile (5d)

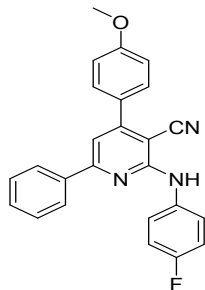

Yellow solid, mp: 169-172°C;  $^1\text{H}$  NMR (400 MHz,  $\text{CDCl}_3$ ):  $\delta$  8.13 (d,  $J = 8.0$  Hz, 1H), 8.03-8.01 (m, 2H), 7.65-7.61 (m, 2H), 7.52 (t,  $J = 8.0$  Hz, 3H), 7.39 (d,  $J = 8.4$  Hz, 3H), 7.03-6.94 (m, 4H), 3.85 (s, 3H);  $^{13}\text{C}$  NMR (100 MHz,  $\text{CDCl}_3$ ): $\delta$  161.5, 158.0, 159.1 & 157.1 (d,  $^1J_{\text{C,F}} = 241.9$  Hz), 155.1, 149.0, 144.5, 133.3, 130.9, 130.8 (2C), 129.6 & 129.5 (d,  $^3J_{\text{C,F}} = 6.1$  Hz) (2C), 128.9 (2C), 127.3 (2C), 127.1, 115.6, 115.3 (d,  $^2J_{\text{C,F}} = 22.9$  Hz) (2C), 114.7 (2C), 114.4, 113.6, 89.6, 55.5; IR (KBr,  $\text{cm}^{-1}$ ): 3336, 2952, 2931, 2216, 1619, 1582, 1498, 1210; HRMS (ESI) ( $[\text{M}]^+$ ) calcd for  $\text{C}_{25}\text{H}_{19}\text{N}_3\text{OF}$ : 396.1512, found: 396.1513.

### 6-Phenyl-2-(phenylamino)-4-(thiophen-2-yl)nicotinonitrile (5e)

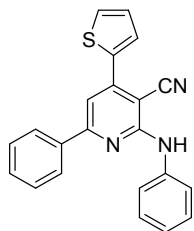

Pale yellow solid, mp: 186-188 °C;  $^1\text{H}$  NMR (400 MHz,  $\text{CDCl}_3$ ):  $\delta$  8.07 (dd,  $J_{1,2} = 2.4$  Hz,  $J_{1,3} = 7.6$  Hz, 2H), 7.89 – 7.88 (m, 1H), 7.75 (d,  $J = 7.6$  Hz, 2H), 7.56 (d,  $J = 5.2$  Hz, 1H), 7.52 – 7.47 (m, 3 H), 7.43 – 7.41 (m, 3H), 7.28 – 7.26 (m, 1H), 7.24 – 7.22 (m, 1H), 7.16 (t,  $J = 7.6$  Hz, 1H);  $^{13}\text{C}$  NMR (100 MHz,  $\text{CDCl}_3$ ): $\delta$  159.2, 156.9, 146.9, 138.8, 138.7, 137.8, 130.4, 130.3, 128.9,

128.8 (2C), 128.7, 128.5 (2C), 127.4 (2C), 123.6, 120.7 (2C), 117.5, 110.4, 90.8; IR (KBr,  $\text{cm}^{-1}$ ): 3328, 2216, 1603, 1549, 1497; HRMS (ESI) ( $[\text{M}]^+1$ ) calcd for  $\text{C}_{22}\text{H}_{16}\text{N}_3\text{S}$ : 354.1065, found: 354.1068.

#### 4-Isobutyl-6-phenyl-2-(o-tolylamino)nicotinonitrile (5f)

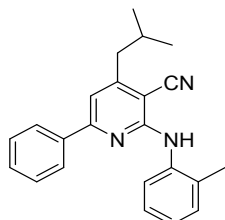

Off White color solid, mp: 131-133 °C;  $^1\text{H}$  NMR (400 MHz,  $\text{CDCl}_3$ ):  $\delta$  8.14 (d,  $J = 8.0$  Hz, 1H), 7.98 (dd,  $J_{1,2} = 3.2$  Hz,  $J_{1,3} = 4.8$  Hz, 2H), 7.58 – 7.49 (m, 3H), 7.44 (d,  $J = 3.2$  Hz, 2H), 7.09 – 7.08 (m, 3H), 2.72 (d,  $J = 7.6$  Hz, 2H), 2.37 (s, 3H), 2.17-2.11 (m, 1H), 1.04 (d,  $J = 6.4$  Hz, 6H);  $^{13}\text{C}$  NMR (100 MHz,  $\text{CDCl}_3$ ):  $\delta$  158.5, 157.0, 156.0, 139.1, 139.0, 138.0, 130.6, 130.5, 128.7 (2C), 127.3 (2C), 126.4 (2C), 122.3, 116.7, 111.7, 91.4, 43.9, 29.6, 22.4 (2C), 18.0; IR (KBr,  $\text{cm}^{-1}$ ): 3316, 2952, 2864, 2216, 1619, 1582, 1498; HRMS (ESI) ( $[\text{M}]^+1$ ) calcd for  $\text{C}_{23}\text{H}_{24}\text{N}_3$ : 342.1970, found: 342.1984.

#### 6-(4-Methoxyphenyl)-4-phenyl-2-(o-tolylamino)nicotinonitrile (5g)

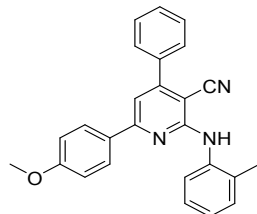

Brown color solid, mp: 199-201 °C;  $^1\text{H}$  NMR (400 MHz,  $\text{CDCl}_3$ ):  $\delta$  8.12 (d,  $J = 8.0$  Hz, 1H), 8.0 (d,  $J = 8.8$  Hz, 2H), 7.68 -7.65 (m, 2H), 7.57 – 7.50 (m, 3H), 7.33 – 7.27 (m, 2H), 7.25 (s, 1H), 7.14 – 7.10 (m, 2H), 6.97 (d,  $J = 8.0$  Hz, 2H), 3.87 (s, 3H), 2.40 (s, 3H);  $^{13}\text{C}$  NMR (100 MHz,  $\text{CDCl}_3$ ):  $\delta$  160.0, 157.4, 156.4, 155.8, 141.8, 137.7, 136.6, 136.3, 130.6, 129.7, 128.9 (2C), 128.9 (2C), 128.2 (2C), 126.4 (2C), 124.3, 122.3, 114.1 (2C), 110.3, 90.8, 55.3, 18.0; IR (KBr,  $\text{cm}^{-1}$ ): 3423, 2962, 2923, 2200, 1598, 1483, 1168; HRMS (ESI) ( $[\text{M}]^+1$ ) calcd for  $\text{C}_{26}\text{H}_{22}\text{N}_3\text{O}$ : 392.1763, found: 392.1747.



#### 4-Isobutyl-6-phenyl-2-(phenylamino)nicotinonitrile (5h)

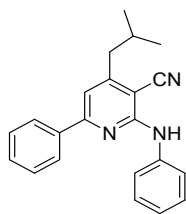

White solid, mp:124-126°C; <sup>1</sup>H NMR (400 MHz, CDCl<sub>3</sub>): δ 8.03 (dd, *J*<sub>1,2</sub> = 2.0 Hz, *J*<sub>1,3</sub> = 8.0 Hz, 2H), 7.74 (d, *J* = 8.0 Hz, 2H), 7.50 -7.43 (m, 3H), 7.41 (t, *J* = 8.0 Hz, 2H), 7.12-7.09 (m, 3H), 2.71 (d, *J* = 6.8 Hz, 2H), 2.13-2.06 (m, 1H), 1.03 (d, *J* = 6.8 Hz, 6H); <sup>13</sup>C NMR (100 MHz, CDCl<sub>3</sub>):δ 158.4, 157.0, 156.1, 139.0, 138.0, 130.1, 128.9 (2C), 128.7 (2C), 127.3 (2C), 123.3, 120.3 (2C), 116.5, 112.0, 91.0, 44.0, 29.7, 22.3 (2C); IR (KBr, cm<sup>-1</sup>): 3335, 2953, 2863, 2216, 1619, 1582, 1498; HRMS (ESI) ([*M*]<sup>+</sup>) calcd for C<sub>22</sub>H<sub>22</sub>N<sub>3</sub>: 328.1814, found: 328.1810.

#### 4-(4-Nitrophenyl)-6-phenyl-2-(phenylamino)nicotinonitrile (5i)

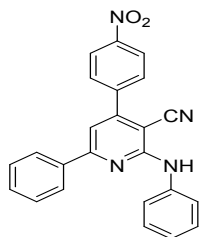

Orange solid, mp: 208-210 °C; <sup>1</sup>H NMR (400 MHz, CDCl<sub>3</sub>): δ 8.43 (d, *J* = 8.4 Hz, 2H), 8.07 (d, *J* = 3.6 Hz, 2H), 7.84 (d, *J* = 8.8 Hz, 2H), 7.75 (d, *J* = 8.4 Hz, 2H), 7.51-7.42 (m, 5H), 7.31-7.26 (m, 2H), 7.21-7.18 (m, 1H); <sup>1</sup>H NMR (400 MHz, D<sub>2</sub>O exchange): δ 8.43 (d, *J* = 8.0 Hz, 2H), 8.07 (d, *J* = 4.0 Hz, 2H), 7.84 (d, *J* = 8.8 Hz, 2H), 7.75 (d, *J* = 8.0 Hz, 2H), 7.52-7.49 (m, 3H), 7.45-7.43 (m, 2H), 7.31 (s, 1H), 7.22-7.16 (m, 1H); <sup>13</sup>C NMR (100 MHz, CDCl<sub>3</sub>):δ 159.6, 156.6, 153.1, 148.3, 143.1, 138.5, 137.4, 130.7, 129.4 (2C), 129.0, 128.9 (2C), 127.4 (2C), 124.5 (2C), 124.0 (2C), 120.9 (2C), 116.3, 110.9, 89.5; IR (KBr, cm<sup>-1</sup>): 3335, 2217, 1607, 1579, 1514, 1498, 1352; HRMS (ESI) ([*M*]<sup>+</sup>) calcd for C<sub>24</sub>H<sub>17</sub>N<sub>4</sub>O<sub>2</sub>: 393.1352, found: 393.1349.

## 2-((4-Cyanophenyl)amino)-4-(4-methoxyphenyl)-6-phenylnicotinonitrile (5j)

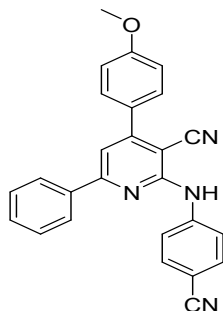

Off white color solid, mp:157-159 °C;  $^1\text{H}$  NMR (400 MHz,  $\text{CDCl}_3$ ):  $\delta$  7.97-7.90 (m, 3H), 7.65-7.60 (m, 2H), 7.51 (t,  $J = 7.2$  Hz, 3H), 7.38 (d,  $J = 8.0$  Hz, 3H), 7.02-6.93 (m, 4H), 3.92 (s, 3H);  $^{13}\text{C}$  NMR (100 MHz,  $\text{CDCl}_3$ ): $\delta$  161.7, 159.8, 158.7, 148.1, 137.4, 135.7, 134.1 (2C), 133.4, 129.1 (2C), 128.8 (2C), 128.6 (2C), 128.3, 128.0 (2C), 115.0, 114.5 (2C), 111.9, 111.7, 108.7, 89.6, 55.2; IR (KBr,  $\text{cm}^{-1}$ ): 3394, 2913, 2254, 2223, 1606, 1572, 1449, 1178; HRMS (ESI) ( $[\text{M}]^+$ ) calcd for  $\text{C}_{26}\text{H}_{19}\text{N}_4\text{O}$ : 403.1559, found: 403.1560.

## 2-((4-Bromophenyl)amino)-6-phenyl-4-(thiophen-2-yl)nicotinonitrile (5k)

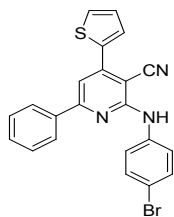

Brown color solid, mp: 196-198°C;  $^1\text{H}$  NMR (400 MHz,  $\text{CDCl}_3$ ):  $\delta$  8.04 (dd,  $J_{1,2} = 3.2$  Hz,  $J_{1,3} = 8.0$  Hz, 2H), 7.89 (dd,  $J_{1,2} = 2.8$  Hz,  $J_{1,3} = 8.0$  Hz, 1H), 7.65-7.63 (m, 2H), 7.57-7.49 (m, 7H), 7.44 (s, 1H), 7.24-7.22 (m, 1H);  $^{13}\text{C}$  NMR (100 MHz,  $\text{CDCl}_3$ ): $\delta$  159.2, 156.9, 149.3, 146.9, 137.9, 137.6, 131.8 (2C), 130.5, 129.1, 128.9 (2C), 128.5 (2C), 127.3 (2C), 122.3 (2C), 117.9, 116.3, 110.7, 88.1; IR (KBr,  $\text{cm}^{-1}$ ): 3343, 2218, 1620, 1573, 1490; HRMS (ESI) ( $[\text{M}]^+$ ) calcd for  $\text{C}_{22}\text{H}_{15}\text{N}_3\text{SBr}$ : 432.0170, found: 432.0199.

#### 6-(4-Chlorophenyl)-2-((2,3-dimethylphenyl)amino)-4-phenylnicotinonitrile (5l)

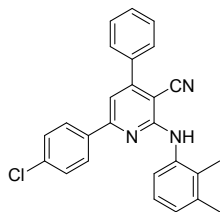

Off white solid, mp: 152-154°C; <sup>1</sup>H NMR (400 MHz, CDCl<sub>3</sub>): δ 7.91 (dd,  $J_{1,2}$  = 2.0 Hz,  $J_{1,3}$  = 8.8 Hz, 2H), 7.72 -7.65 (m, 3H), 7.57-7.51 (m, 3H), 7.40 (dd,  $J_{1,2}$  = 2.0 Hz,  $J_{1,3}$  = 6.8 Hz, 2H), 7.24 (s, 1H), 7.21 (t,  $J$  = 8.0 Hz, 1H), 7.09-7.06 (m, 2H), 2.37 (s, 3H), 2.27 (s, 3H); <sup>13</sup>C NMR (100 MHz, CDCl<sub>3</sub>): δ 157.5, 157.4, 155.5, 141.8, 137.5, 136.9, 136.7, 136.3, 136.2, 129.9, 129.0 (2C), 128.9 (2C), 128.5 (2C), 128.1 (2C), 126.8, 125.5, 121.9, 117.0, 110.5, 89.8, 20.7, 14.0; IR (KBr, cm<sup>-1</sup>): 3307, 2916, 2218, 1583, 1569, 1487; HRMS (ESI) ([M]<sup>+</sup>) calcd for C<sub>26</sub>H<sub>21</sub>N<sub>3</sub>Cl: 410.1424, found: 410.1431.

#### 4-(4-Bromophenyl)-6-phenyl-2-(*o*-tolylamino)nicotinonitrile (5m)

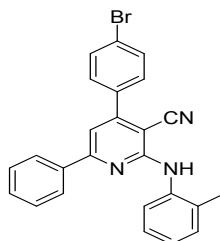

Pale yellow color solid, mp:158-160 °C; <sup>1</sup>H NMR (400 MHz, CDCl<sub>3</sub>): δ 8.11 (d,  $J$  = 8.0 Hz, 1H), 8.02-7.98 (m, 2H), 7.70 (dd,  $J_{1,2}$  = 1.6 Hz,  $J_{1,2}$  = 8.4 Hz, 2H), 7.57-7.50 (m, 4H), 7.46 (t,  $J$  = 4.0 Hz, 2H), 7.33 -7.27 (m, 3H), 7.15-7.12 (m, 1H), 2.39 (s, 3H); <sup>13</sup>C NMR (100 MHz, CDCl<sub>3</sub>):δ 158.2, 155.3, 153.4, 143.3, 137.2, 135.2, 132.3, 132.2 (2C), 130.5, 129.9 (2C), 129.1, 128.9 (2C), 127.3 (2C), 126.5, 124.5, 122.2, 122.0, 115.5, 112.9, 89.7,18.0; IR (KBr, cm<sup>-1</sup>): 3446, 2956, 2235, 1658, 1608, 1486; HRMS (ESI) ([M]<sup>+</sup>) calcd for C<sub>25</sub>H<sub>19</sub>N<sub>3</sub>Br: 440.0762, found: 440.0753.

#### 4-(Furan-2-yl)-6-phenyl-2-(*o*-tolylamino)nicotinonitrile (5n)

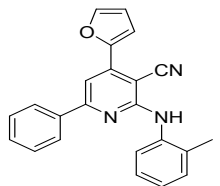

Brown color solid, mp:147-149 °C; <sup>1</sup>H NMR (400 MHz, CDCl<sub>3</sub>): δ 8.10 (d,  $J$  = 8.0 Hz, 1H), 8.04

– 8.02 (m, 2H), 7.67 (d,  $J = 7.2$  Hz, 2H), 7.53 (d,  $J = 4.0$  Hz, 1H), 7.47-7.44 (m, 3H), 7.31-7.28 (m, 2H), 7.13 (t,  $J = 7.6$  Hz, 2H), 6.65 (dd,  $J_{1,2} = 1.6$  Hz,  $J_{1,3} = 3.6$  Hz, 1H), 2.39 (s, 3H);  $^{13}\text{C}$  NMR (100 MHz,  $\text{CDCl}_3$ ):  $\delta$  158.7, 155.6, 153.1, 146.6, 144.5, 138.8, 138.3, 130.6, 130.2, 128.7 (2C), 127.3 (2C), 126.5, 124.3, 124.2, 120.7, 116.5, 113.1, 112.6, 106.2, 86.0, 18.0; IR (KBr,  $\text{cm}^{-1}$ ): 3434, 2953, 2198, 1602, 1556, 1487, 1032; HRMS (ESI) ( $[\text{M}]^+$ ) calcd for  $\text{C}_{23}\text{H}_{18}\text{N}_3\text{O}$ : 352.1450, found: 352.1458.

### 6-(4-Cyanophenyl)-2-((2,3-dimethylphenyl)amino)-4-phenylnicotinonitrile (5o)

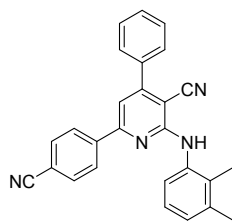

Brown color solid, mp: 198-200 °C;  $^1\text{H}$  NMR (400 MHz,  $\text{CDCl}_3$ ):  $\delta$  8.06 (d,  $J = 8.8$  Hz, 2H), 7.69-7.64 (m, 4H), 7.58-7.55 (m, 2H), 7.39-7.29 (m, 3H), 7.22 (t,  $J = 7.6$  Hz, 1H), 7.12-6.92 (m, 2H), 2.37 (s, 3H), 2.27 (s, 3H);  $^{13}\text{C}$  NMR (100 MHz,  $\text{CDCl}_3$ ):  $\delta$  157.4, 156.4, 155.8, 141.8, 137.7, 136.6, 136.3, 132.4 (2C), 130.1, 129.2, 129.0 (2C), 128.1 (2C), 127.4 (2C), 127.1, 125.6, 122.1, 118.5, 116.7, 113.3, 111.2, 90.8, 20.7, 14.0; IR (KBr,  $\text{cm}^{-1}$ ): 3308, 2938, 2228, 2204, 1606, 1583, 1492; HRMS (ESI) ( $[\text{M}]^+$ ) calcd for  $\text{C}_{27}\text{H}_{21}\text{N}_4$ : 401.1766, found: 401.1749.

### 2-((2,3-Dimethylphenyl)amino)-6-phenyl-4-propylnicotinonitrile (5p)

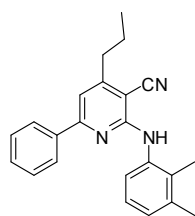

Brown gummy solid;  $^1\text{H}$  NMR (400 MHz,  $\text{CDCl}_3$ ):  $\delta$  7.93 (d,  $J = 4.0$  Hz, 2H), 7.78 (d,  $J = 8.0$  Hz, 1H), 7.41-7.40 (m, 3H), 7.16-7.11 (m, 2H), 7.04-7.02 (m, 1H), 6.90 (s, 1H), 2.82 (t,  $J = 7.6$  Hz, 2H), 2.35 (s, 3H), 2.26 (s, 3H), 1.82-1.76 (m, 2H), 1.07 (t,  $J = 7.2$  Hz, 3H);  $^{13}\text{C}$  NMR (100 MHz,  $\text{CDCl}_3$ ):  $\delta$  158.6, 157.0, 156.1, 139.0, 138.1, 130.6, 129.0 (2C), 128.9, 127.6 (2C), 126.6, 125.5, 123.3, 120.0, 115.3, 112.1, 89.5, 42.4, 29.6, 20.9, 13.8, 13.6; IR (KBr,  $\text{cm}^{-1}$ ): 3316, 2916, 2864, 2218, 1620, 1582, 1498; HRMS (ESI) ( $[\text{M}]^+$ ) calcd for  $\text{C}_{23}\text{H}_{24}\text{N}_3$ : 342.1970, found: 342.1972.

### 6-(Furan-2-yl)-4-phenyl-2-(o-tolylamino) nicotinonitrile (5q)

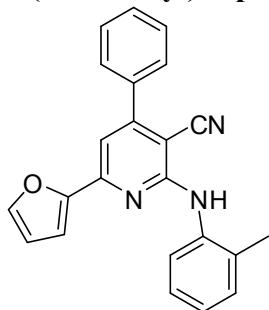

Pale yellow solid, mp: 166-168 °C; <sup>1</sup>H NMR (400 MHz, CDCl<sub>3</sub>): δ 8.07 (d, *J* = 8.0 Hz, 1H), 7.61 – 7.59 (m, 2H), 7.47 – 7.45 (m, 4H), 7.22 -7.18 (m, 2H), 7.02 – 6.95 (m, 3H), 6.66 (t, *J* = 7.6 Hz, 1H), 6.47 (dd, *J*<sub>1,2</sub> = 2.0 Hz, *J*<sub>1,3</sub> = 3.6 Hz, 1H), 2.31(s, 3H); <sup>13</sup>C NMR (100 MHz, CDCl<sub>3</sub>):δ 156.8, 155.2, 152.9, 150.1, 144.5, 137.1, 136.8, 130.5, 129.8, 129.3, 128.9(2C), 128.1(2C), 126.4, 124.2, 122.2, 117.1, 112.4, 112.1,109.1, 89.4, 18.0; IR (KBr, cm<sup>-1</sup>) 3431, 2201, 1602, 1541,1478, 1012; ESI-MS (M+1); 352.1.

### 2-(3-Oxo-1,3-diphenylpropyl)malononitrile (6)

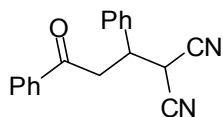

White solid, mp 122- 124 °C; <sup>1</sup>H NMR (400 MHz, CDCl<sub>3</sub>): δ 7.98 (d, *J* = 7.6 Hz, 2H), 7.64-7.51 (m, 1H), 7.49-7.39 (m, 7H), 4.65 (d, *J* = 4.8 Hz, 1H), 3.98-3.93 (m, 1H), 3.70-3.61 (m, 2H); IR (KBr, cm<sup>-1</sup>) 2901, 2255, 1682, 1449, 1186; MS (ESI) (M+NH<sub>3</sub>); 292.10.

### 3-(4-Chlorophenyl)-5-phenyl-2,6-dicyanoanilines (7)

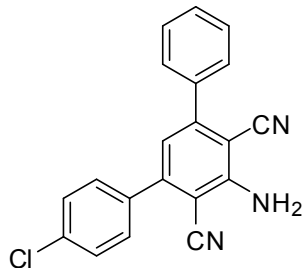

Off white solid; mp: 246-248°C; <sup>1</sup>H NMR (400 MHz, CDCl<sub>3</sub>): δ 7.58 (d, *J* = 8.0 Hz, 2H), 7.53 – 7.47 (m, 7H), 6.86 (s, 1H), 5.39 (s, 2H); IR (KBr): 3466, 3365, 2214, 1499 cm<sup>-1</sup>

### 2-(4-Methoxybenzylidene)malononitrile (8)

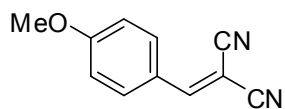

Pale yellow solid, mp 114-116 °C; <sup>1</sup>H NMR (400 MHz, CDCl<sub>3</sub>): 7.92 (d, *J* = 8.0 Hz, 2H), 7.65 (s, 1H), 7.03 (d, *J* = 8.0 Hz, 2H), 3.91 (s, 3H); IR (KBr, cm<sup>-1</sup>) 2984, 2222, 1605, 1456.

### Procedure for the scale up of compound **5i**

To a mixture of acetophenone (**1a**, 4.0 g, 0.033 mmol), 4-nitrobenzaldehyde (**2e**, 5.03 g, 0.033 mmol), aniline (**3b**, 3.1 g, 0.033 mmol), and malononitrile **4**, 2.2 g, 0.033 mmol) in PEG-400 (8 mL) was added FeF<sub>3</sub> (0.375 g, 10 mol%) at room temperature. The mixture was then stirred at 60 °C under ultrasound irradiation in open air for 3h (the reaction was monitored by TLC). After completion of the reaction the mixture was diluted with EtOAc (60 mL) and filtered to separate the catalyst. The filtrate was collected, washed with cold water (2 x 30 mL), dried over anhydrous Na<sub>2</sub>SO<sub>4</sub>, filtered and concentrated under low vacuum. The residue was purified by column chromatography over silica gel (100-200 mesh) using EtOAc-hexane to give the desired product **5i** (11.75 g, 90%).

**Recovery of catalyst:** The filtered catalyst was collected, dried under vacuum below 50 °C and reused for the next cycle.

### Pharmacology

#### *Materials and Methods*

**Cells and Reagents:** HEK 293 and Sf9 cells were obtained from ATCC (Washington D.C., USA). HEK 293 cells were cultured in DMEM supplemented with 10% fetal bovine serum (Invitrogen Inc., San Diego, CA, USA). Sf9 cells were routinely maintained in Grace's supplemented medium (Invitrogen) with 10% FBS. RAW 264.7 cells (murine macrophage cell line) were obtained from ATCC and routinely cultured in RPMI 1640 medium with 10% fetal bovine serum (Invitrogen Inc.). cAMP was purchased from SISCO Research Laboratories (Mumbai, India). PDElight HTS cAMP phosphodiesterase assay kit was procured from Lonza (Basel, Switzerland).

#### *PDE4B protein production and purification*

PDE4B cDNA was sub-cloned into pFAST Bac HTB vector (Invitrogen) and transformed into

DH10Bac (Invitrogen) competent cells. Recombinant bacmids were tested for integration by PCR analysis. Sf9 cells were transfected with bacmid using Lipofectamine 2000 (Invitrogen) according to manufacturer's instructions. Subsequently, P3 viral titer was amplified, cells were infected and 48 h post infection cells were lysed in lysis buffer (50 mM Tris-HCl pH 8.5, 10 mM 2-Mercaptoethanol, 1 % protease inhibitor cocktail (Roche), 1 % NP40). Recombinant His-tagged PDE4B protein was purified as previously described elsewhere (Wang et al., 1997). Briefly, lysate was centrifuged at 10,000 rpm for 10 min at 4°C and supernatant was collected. Supernatant was mixed with Ni-NTA resin (GE Life Sciences) in a ratio of 4:1 (v/v) and equilibrated with binding buffer (20 mM Tris-HCl pH 8.0, 500 mM-KCl, 5 mM imidazole, 10 mM 2-mercaptoethanol and 10 % glycerol) in a ratio of 2:1 (v/v) and mixed gently on rotary shaker for 1 hour at 4°C. After incubation, lysate-Ni-NTA mixture was centrifuged at 4,500 rpm for 5 min at 4°C and the supernatant was collected as the flow-through fraction. Resin was washed twice with wash buffer (20 mM Tris-HCl pH 8.5, 1 M KCl, 10 mM 2-Mercaptoethanol and 10% glycerol). Protein was eluted sequentially twice using elution buffers (Buffer I: 20 mM Tris-HCl pH 8.5, 100 mM KCl, 250 mM imidazole, 10 mM 2-mercaptoethanol, 10% glycerol, Buffer II: 20 mM Tris-HCl pH 8.5, 100 mM KCl, 500 mM imidazole, 10 mM 2-mercaptoethanol, 10% glycerol). Eluates were collected in four fractions and analyzed by SDS-PAGE. Eluates containing PDE4B protein were pooled and stored at -80°C in 50% glycerol until further use.

#### *PDE4B enzymatic assay*

The inhibition of PDE4B enzyme was measured using PDElight HTS cAMP phosphodiesterase assay kit (Lonza) according to manufacturer's recommendations. Briefly, 10 ng of PDE4B enzyme was pre-incubated either with DMSO (vehicle control) or compound for 15 min before incubation with the substrate cAMP (5 µM) for 1 h. The reaction was halted with stop solution followed by incubation with detection reagent for 10 minutes in dark. Luminescence values (RLUs) were measured by a Multilabel plate reader (Perkin Elmer 1420 Multilabel counter). The percentage of inhibition was calculated using the following formula:

$$\% \text{ inhibition} = \frac{(RLU \text{ of vehicle control} - RLU \text{ of inhibitor})}{RLU \text{ of vehicle control}} \times 100$$

#### **Docking studies**

To understand the binding affinity and molecular interactions of compounds in the binding pocket of PDE4B the molecular docking simulations were carried out using GRIP method of docking in

Biopredicta module of Vlife MDS (Molecular Design Suite) 4.6.

**Docking Method:** The PDE4B protein in complex with rolipram obtained from Protein Data Bank (PDB ID: 1XMY) was used as the receptor for docking. The protein structure was visualized and pre-processed with Dock Prep tool of UCSF. Ligand geometries were optimized by energy minimization using Merck Molecular Force Field MMFF94 and Gasteiger-Marsili charges for the atoms till a gradient of 0.001 kcal/mol/Å° was reached, maintaining the template structure rigid during the minimization. The active site pocket of the co-crystallized ligand was selected for docking. The GRIP batch docking and subsequent scoring were performed using the default parameters of the Biopredicta program. The following parameters were followed in the standard docking protocol, number of placements: 30, rotation angle: 30°, exhaustive docking method, scoring function: PLP score.

**Results:** The GRIP docking employs PLP (Piecewise Linear Pair wise Potential) scoring function for protein ligand interactions which includes hydrogen bonding, steric interactions, van der Waals interactions, hydrophobic interactions and electrostatic interactions.

Post docking analysis involved evaluation of interaction energies between each ligand and PDE4B protein for best ligand pose inside the receptor as PLP score. The PLP scores of compounds were compared with the reference Rolipram (Table S-2).

For consensus docking results and to validate the accuracy, molecular simulations were also done with **SWISSDOCK** web server and  $\Delta G$  values were generated (Table S-2).

**Table S-2.** The PLP scores of compounds and the reference compound rolipram and  $\Delta G$  values of compounds.

| <b>Vlife MDS</b> |                              |
|------------------|------------------------------|
| <b>Compound</b>  | <b>PLP score</b>             |
| Rolipram         | -59.35 kcal/mol              |
| <b>5d</b>        | -89.26 kcal/mol              |
| <b>5j</b>        | -91.51 kcal/mol              |
| <b>SWISSDOCK</b> |                              |
| <b>Compound</b>  | <b><math>\Delta G</math></b> |



|           |                |
|-----------|----------------|
| <b>5d</b> | -8.16 kcal/mol |
| <b>5j</b> | -8.40 kcal/mol |

**Molecular Interactions:** The H-bonds and hydrophobic interactions were analyzed post docking simulations and the results showed good binding modes in the active site of PDE4B. The molecular interactions summary of top-ranked docking poses of compounds **5d** and **5j** with PDE4B are listed in Table S-3.

**Table S-3.** H-bonds and hydrophobic interactions of compounds with PDE4B

| <b>Molecular interactions</b> |                       |                          |
|-------------------------------|-----------------------|--------------------------|
| <b>Compounds</b>              | <b>Hydrogen bonds</b> | <b>Hydrophobic bonds</b> |
| <b>5d</b>                     | CYS432                | SER429 , MET431          |
| <b>5j</b>                     | PRO430                | SER429, GLN284           |

The compound **5d** and **5j** showed good binding affinity as compared to standard drugs which revealed that the nature of the substituent and substitution pattern on the basic ring may have a considerable impact on the PDE4B activity of the synthesized compounds. Docking studies demonstrated that both the compounds were binding in the solvent filled side pocket residues in the active site of PDE4B. The **binding interactions of compounds with PDE4B are shown in Figure S-1 and S-2**. Dotted white bond showing H-bond interactions and yellow bonds shows hydrophobic interactions with binding site residues. Compounds and protein are represented by sticks and colored according to the atom type.

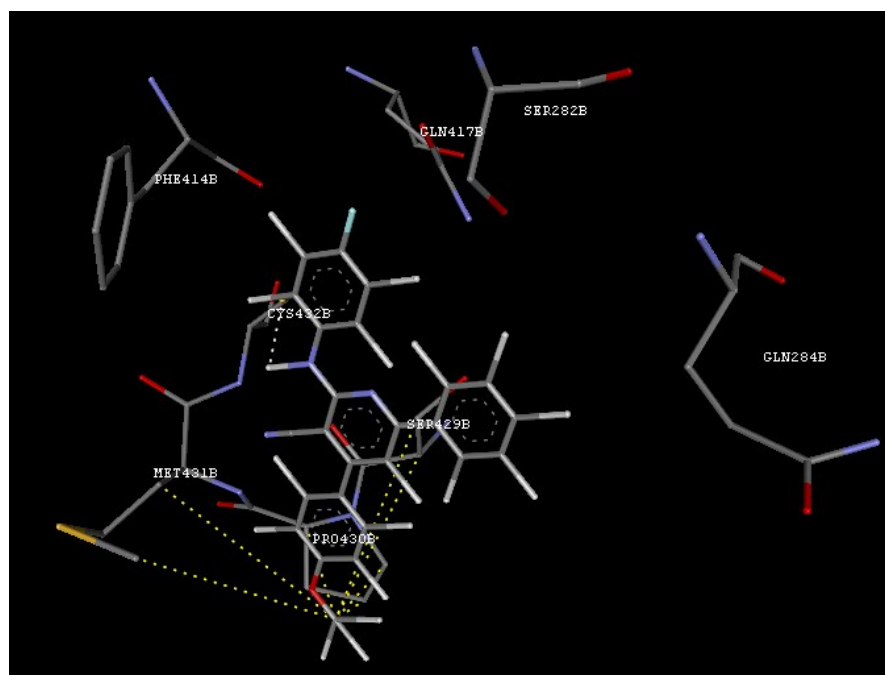

Figure S-1. Binding interaction of compound 5d with PDE4B receptor

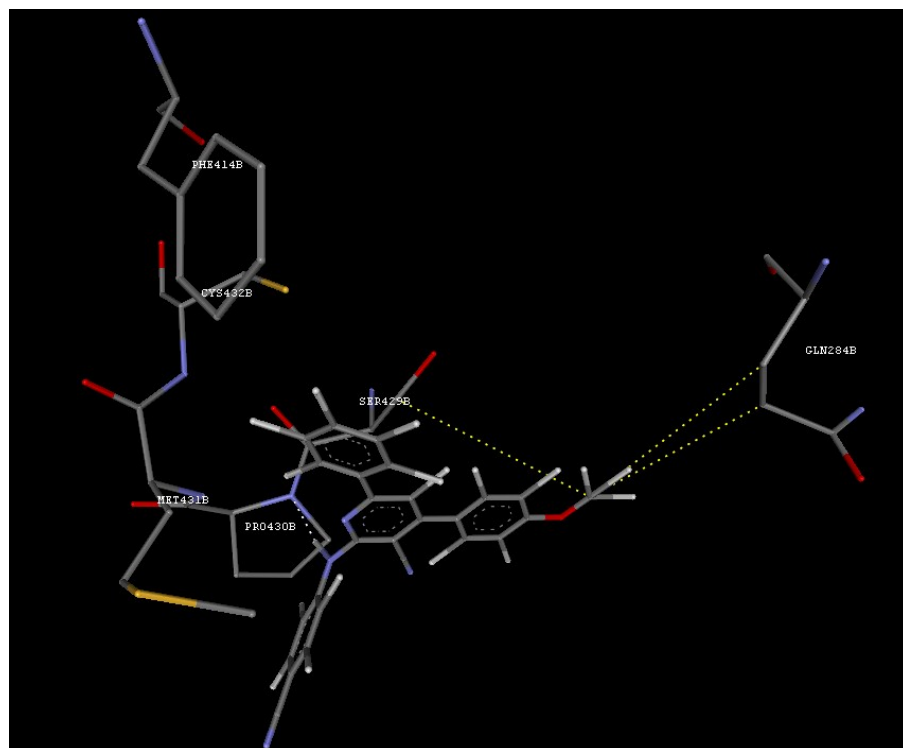

Figure S-2. Binding interaction of compound 5j with PDE4B receptor

## Copies of spectra

### 4,6-Diphenyl-2-(o-tolylamino)nicotinonitrile

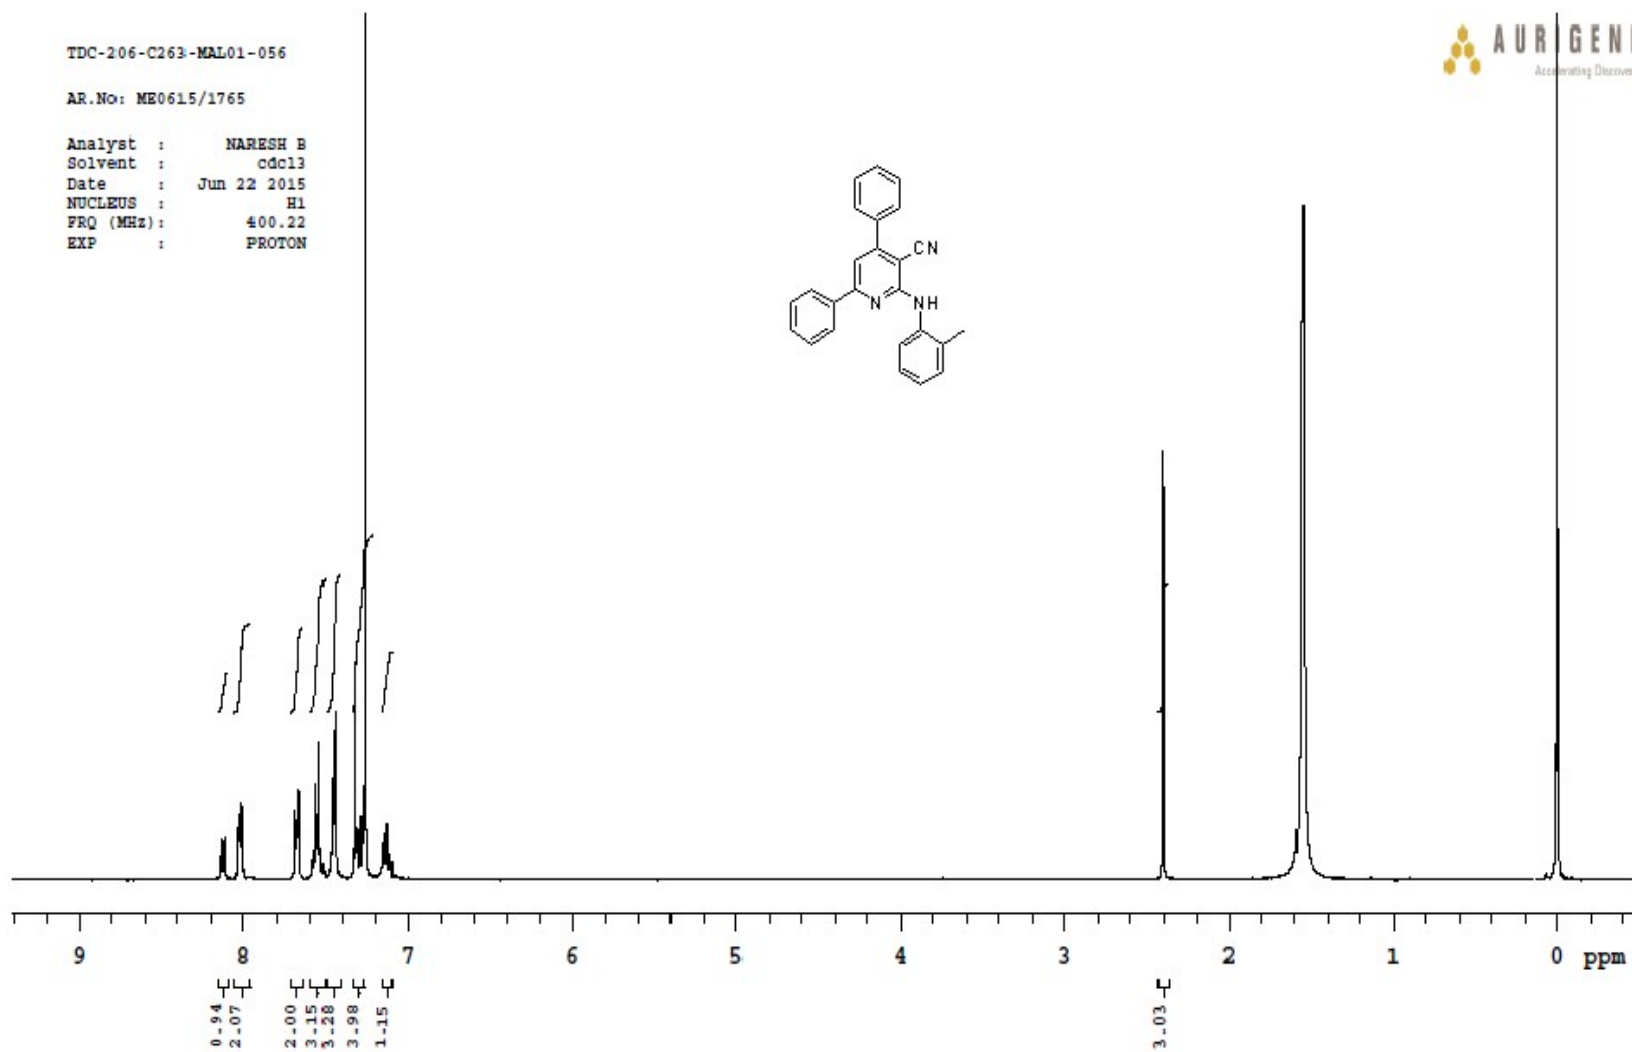

**Elemental Composition Report**

**Single Mass Analysis**

Tolerance = 5.0 PPM / DBE: min = -1.5, max = 100.0

Element prediction: Off

Number of isotope peaks used for i-FIT = 2

Monoisotopic Mass, Even Electron Ions

96 formula(e) evaluated with 1 results within limits (up to 10 closest results for each mass)

Elements Used:

C: 0-30 H: 0-30 N: 0-5 O: 0-2 Br: 0-1

C263/MALO1/056

151016005 18 (0.339) Cm (17:18)

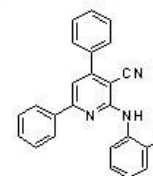

1: TOF MS ES+  
3.28e+004

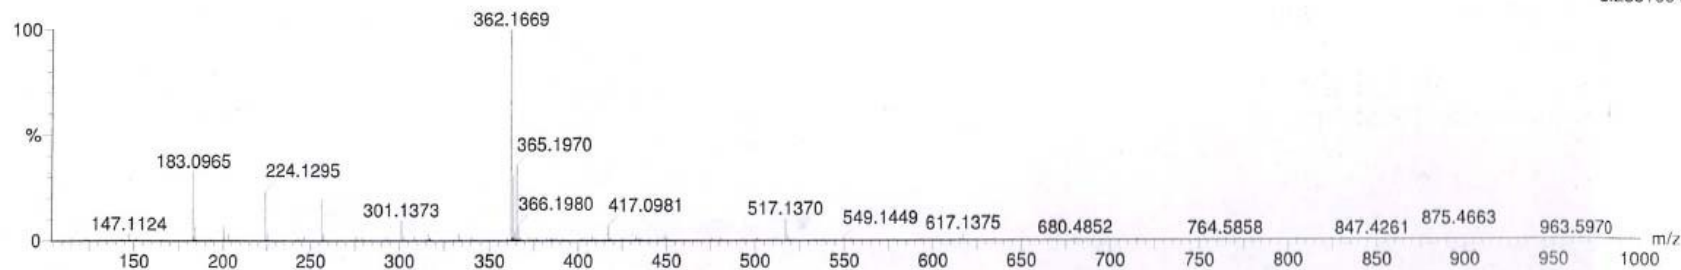

| Mass     | Calc. Mass | mDa | PPM | DBE  | i-FIT | Formula    |
|----------|------------|-----|-----|------|-------|------------|
| 362.1669 | 362.1657   | 1.2 | 3.3 | 17.5 | 19.7  | C25 H20 N3 |

TDC-206 C263/MAL01/056

AR.No: ME1115/1187

Analyst : Mallikarjun  
Solvent : cdcl3  
Date : Nov 14 2015  
NUCLEUS : C13  
FRQ (MHz): 100.65  
EXP : CARBON

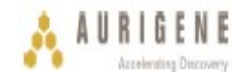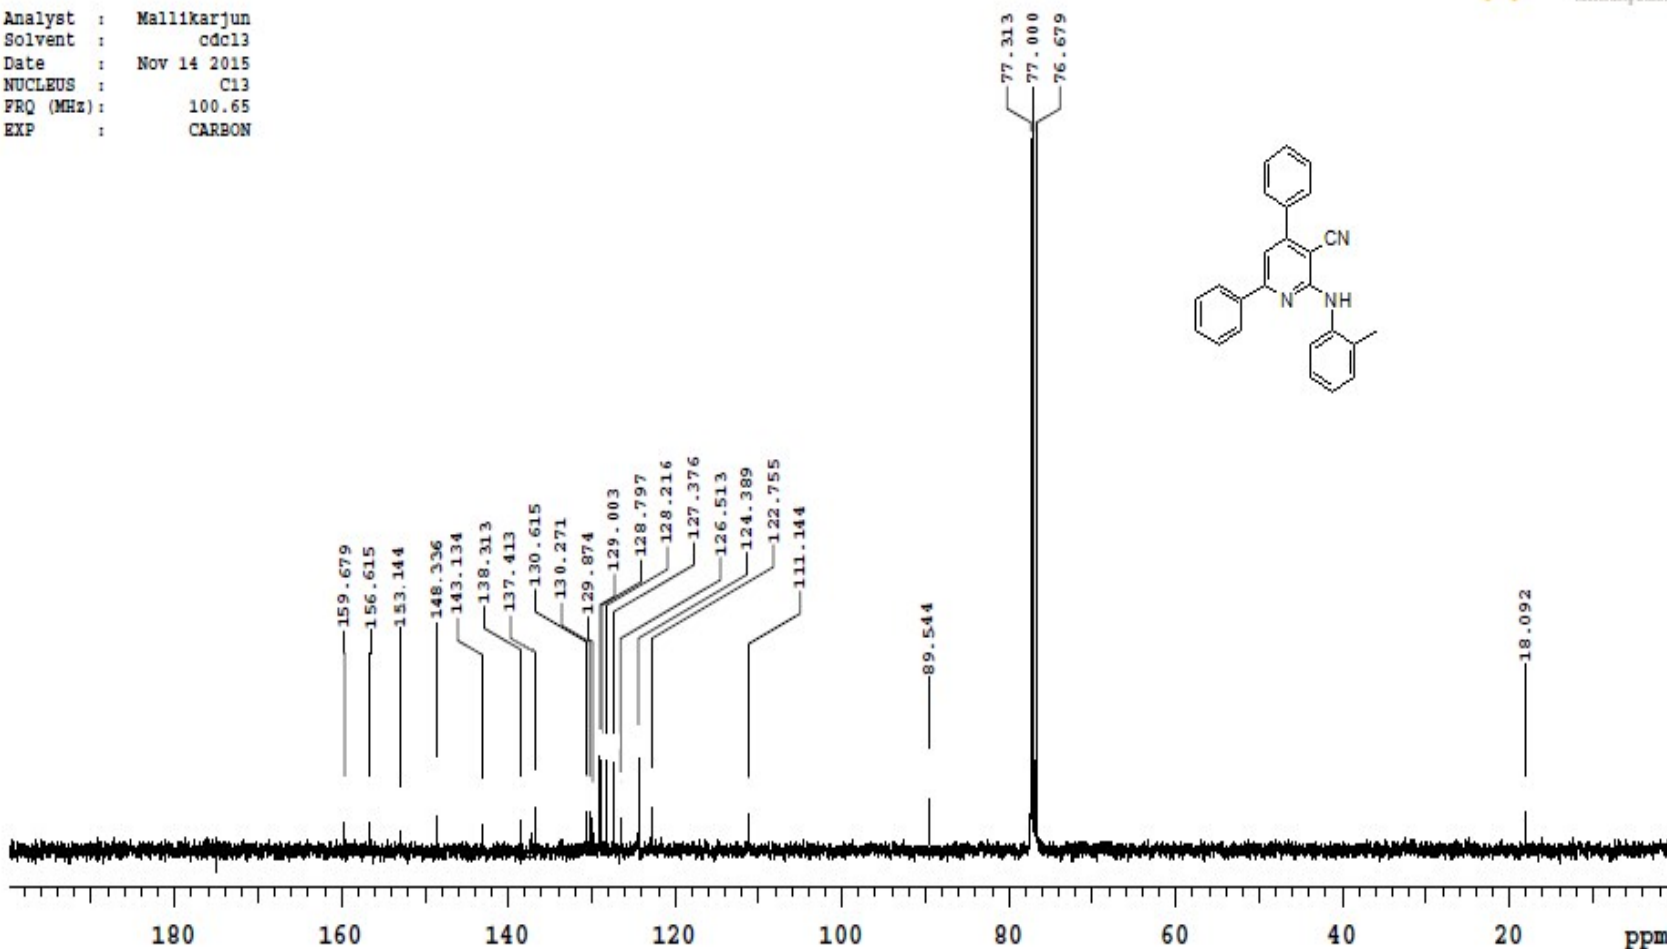

4,6-Diphenyl-2-(phenylamino)nicotinonitrile

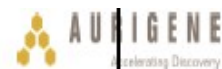

TDC-206-C263-MAL01-058

AR.No: ME0615/2282

Analyst : NARESH B  
Solvent : cdcl3  
Date : Jun 26 2015  
NUCLEUS : H1  
FRQ (MHz): 400.22  
EXP : PROTON

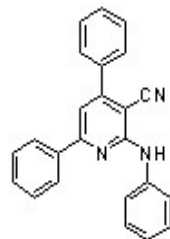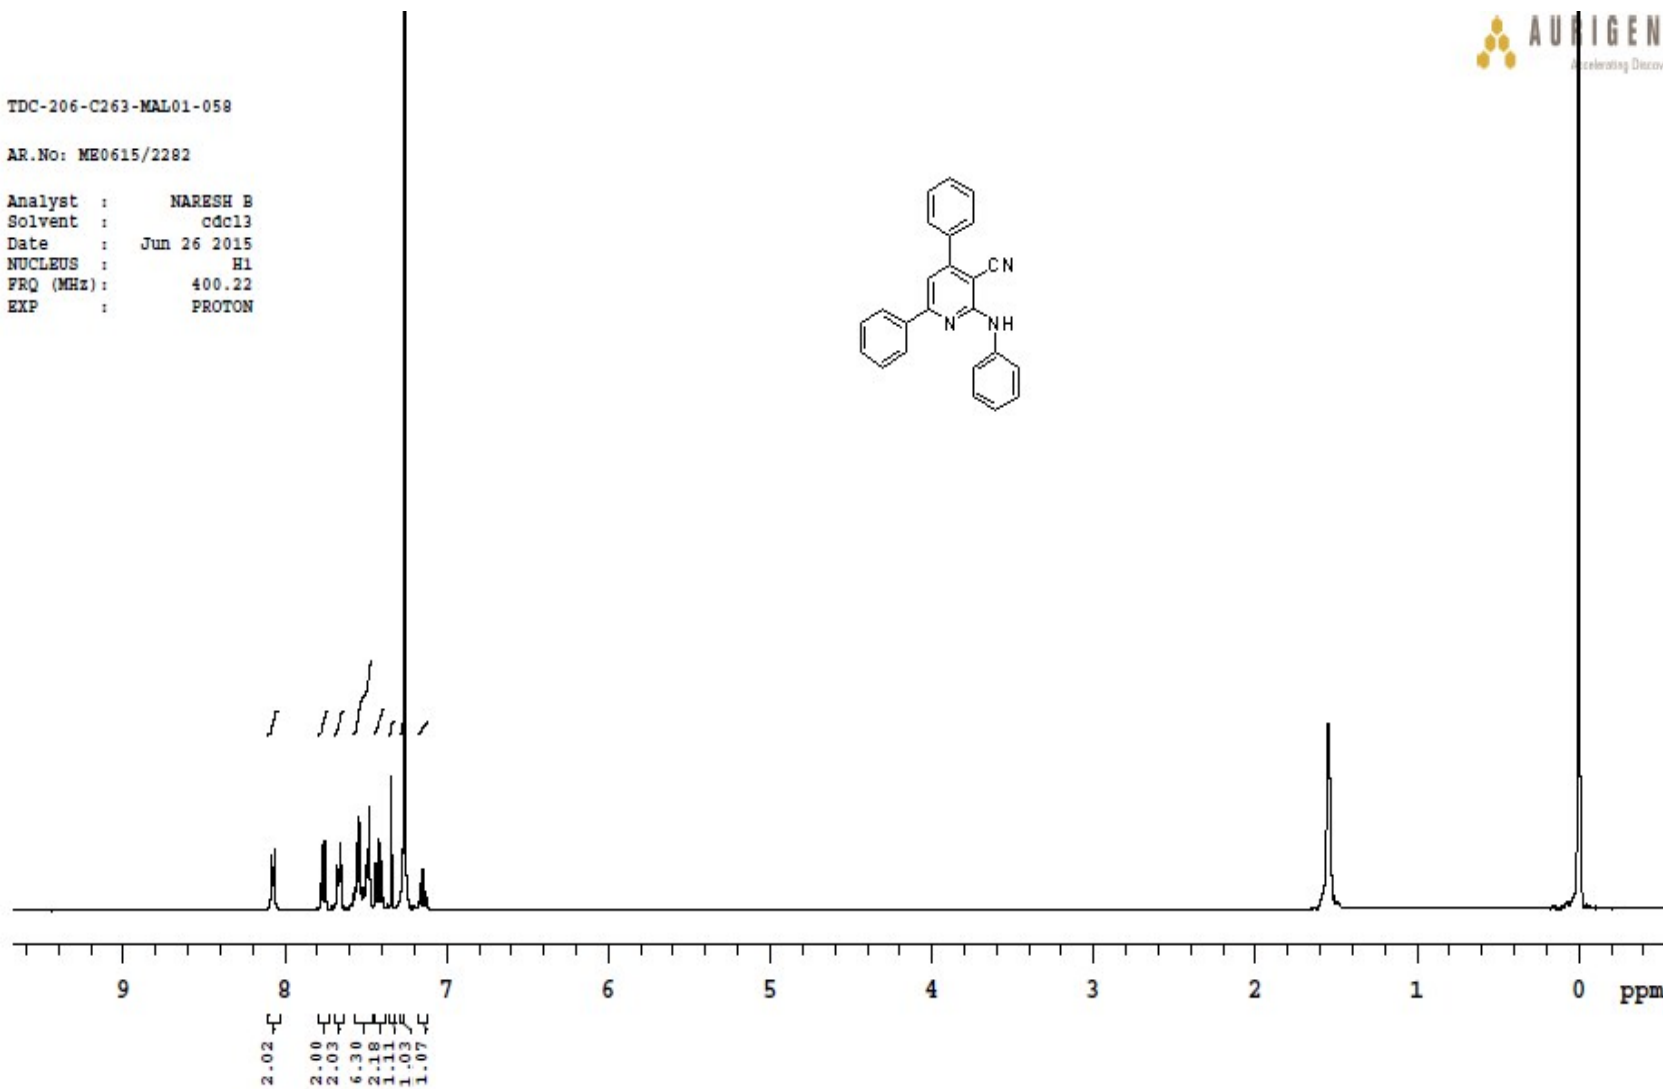

## Elemental Composition Report

### Single Mass Analysis

Tolerance = 5.0 PPM / DBE: min = -1.5, max = 100.0

Element prediction: Off

Number of isotope peaks used for i-FIT = 2

Monoisotopic Mass, Even Electron Ions

48 formula(e) evaluated with 1 results within limits (up to 10 closest results for each mass)

Elements Used:

C: 0-30 H: 0-30 N: 0-5 O: 0-2

C263/MALO1/058

151016006 19 (0.352) Cm (18:19)

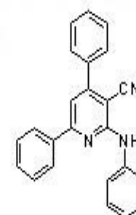

1: TOF MS ES+  
8.93e+004

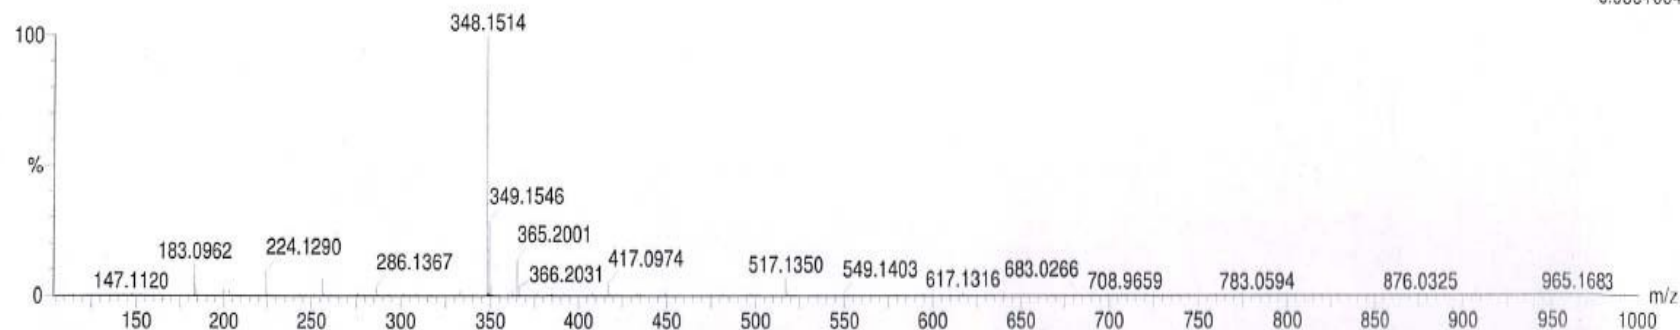

Minimum: -1.5  
Maximum: 5.0 5.0 100.0

| Mass     | Calc. Mass | mDa | PPM | DBE  | i-FIT | Formula    |
|----------|------------|-----|-----|------|-------|------------|
| 348.1514 | 348.1501   | 1.3 | 3.7 | 17.5 | 6.7   | C24 H18 N3 |

TDC-206 C263/MAL01/058

A.R.No: ME0216/1473

Analyst : Mallikarjun  
Solvent : cdcl3  
Date : Feb 16 2016  
NUCLEUS : C13  
FRQ (MHz): 100.65  
EXP : CARBON

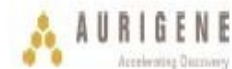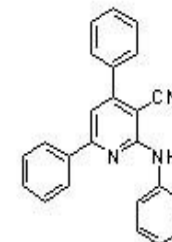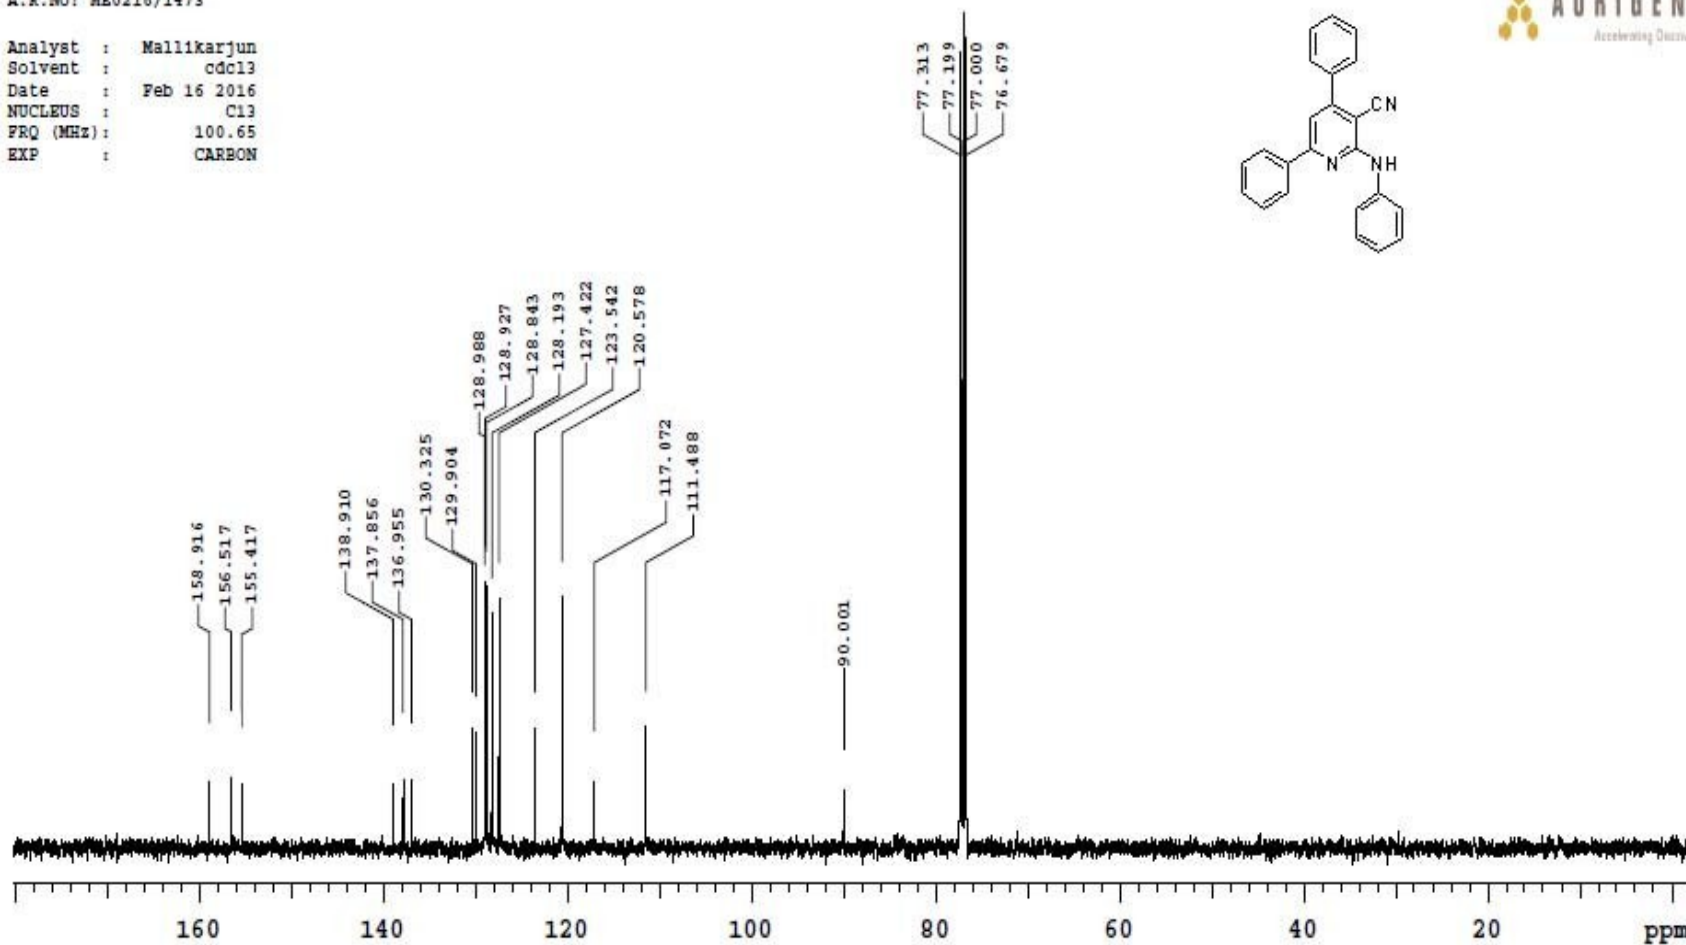



2-((2,3-Dimethylphenyl)amino)-4,6-diphenylnicotinonitrile

TDC-206 C263/MAL01/059

AR.No: ME0715/520

Analyst : Mallikarjun  
Solvent : cdcl3  
Date : Jul 6 2015  
NUCLEUS : H1  
FRQ (MHz): 400.22  
EXP : PROTON

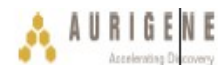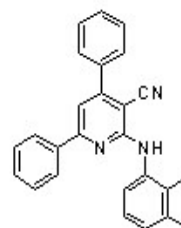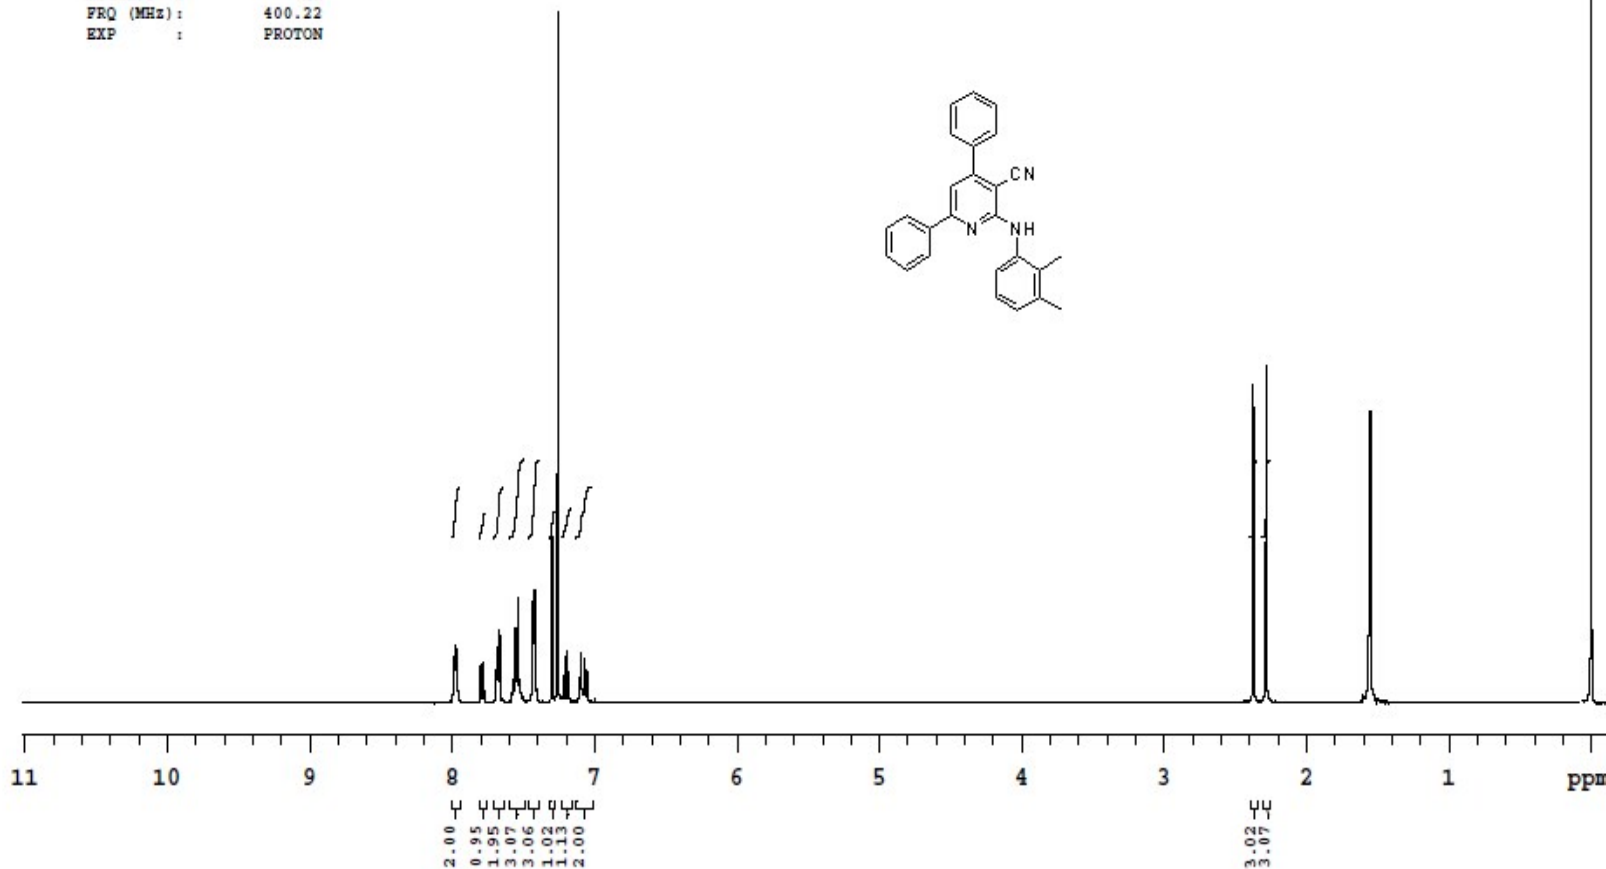

# Elemental Composition Report

## Single Mass Analysis

Tolerance = 5.0 PPM / DBE: min = -1.5, max = 100.0

Element prediction: Off

Number of isotope peaks used for i-FIT = 2

Monoisotopic Mass, Even Electron Ions

47 formula(e) evaluated with 1 results within limits (up to 10 closest results for each mass)

Elements Used:

C: 0-30 H: 0-30 N: 0-5 O: 0-2

C263/MALO1/059

151016007 37 (0.695) Cm (37)

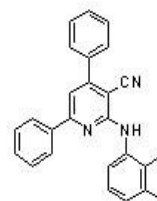

1: TOF MS ES+  
3.62e+004

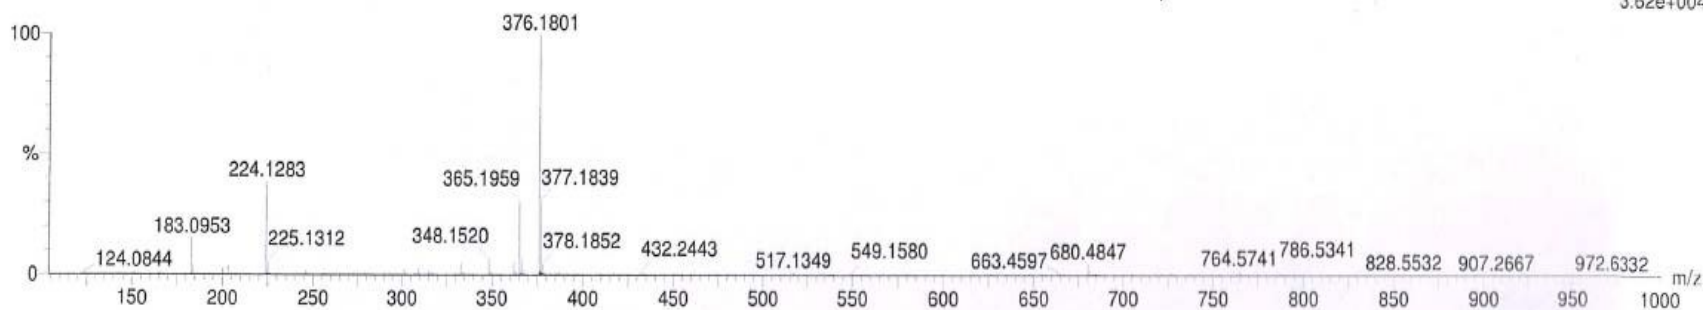

Minimum:

-1.5

Maximum:

5.0 5.0 100.0

| Mass     | Calc. Mass | mDa  | PPM  | DBE  | i-FIT | Formula    |
|----------|------------|------|------|------|-------|------------|
| 376.1801 | 376.1814   | -1.3 | -3.5 | 17.5 | 1.9   | C26 H22 N3 |

TDC-206 C263/MAL01/059

AR.No: ME1015/1393

Analyst : Mallikarjun  
Solvent : cdcl3  
Date : Oct 17 2015  
NUCLEUS : C13  
PRQ (MHz): 100.65  
EXP : CARBON

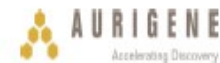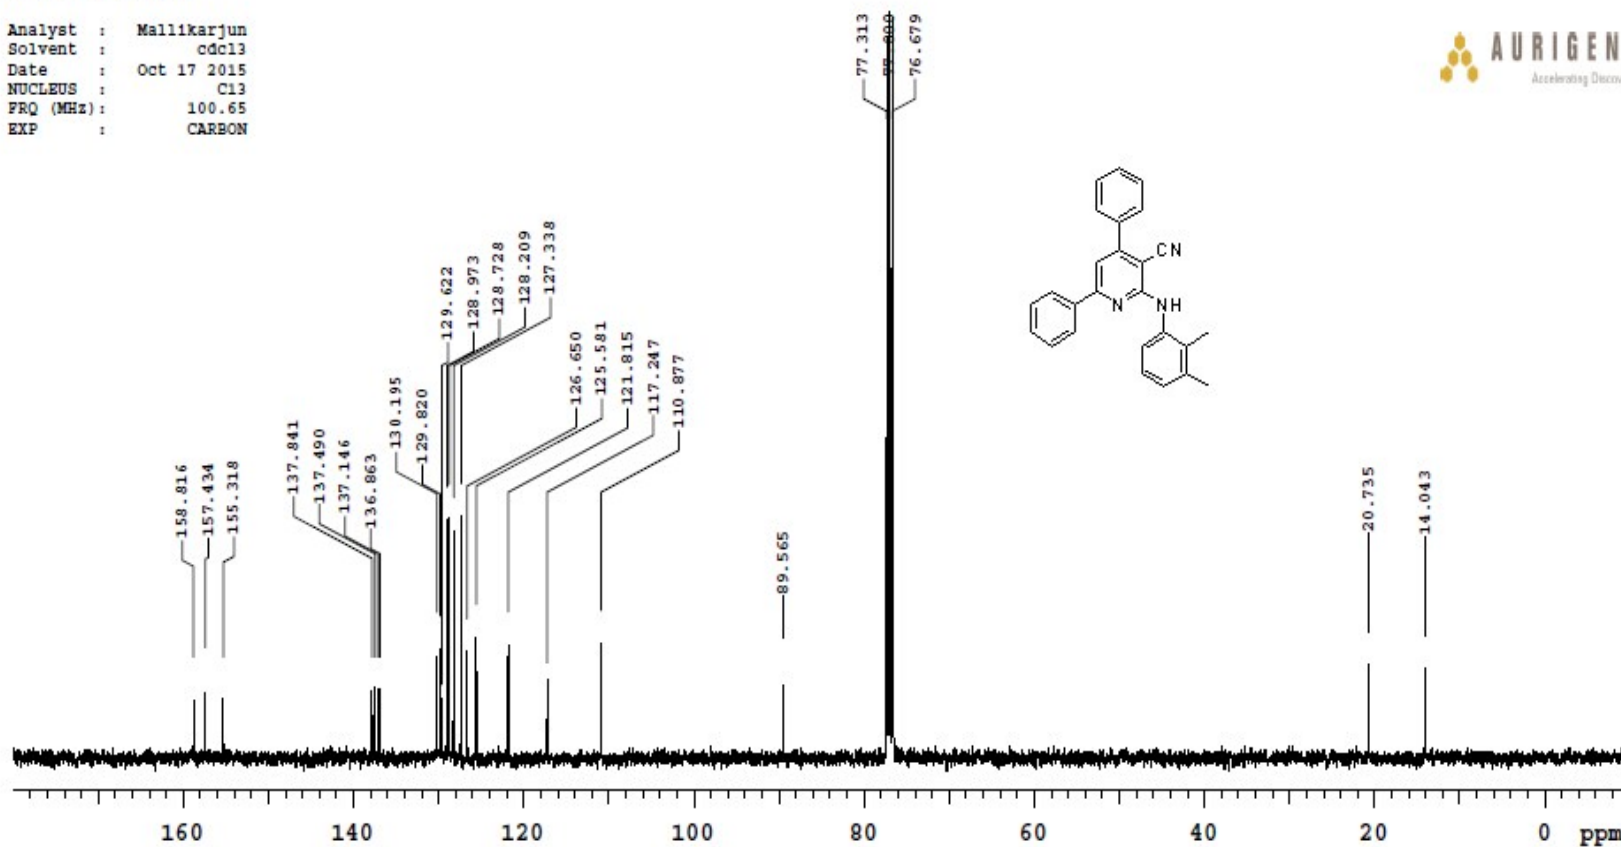

2-((4-Fluorophenyl)amino)-4-(4-methoxyphenyl)-6-phenylnicotinonitrile

TDC-206 C263/MAL01/061

AR.No: ME0815/2417

Analyst : Mallikarjun  
Solvent : cdcl3  
Date : Aug 25 2015  
NUCLEUS : H1  
FRQ (MHz): 400.22  
EXP : PROTON

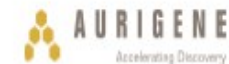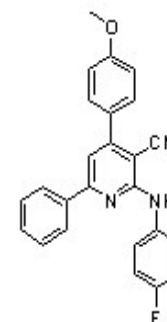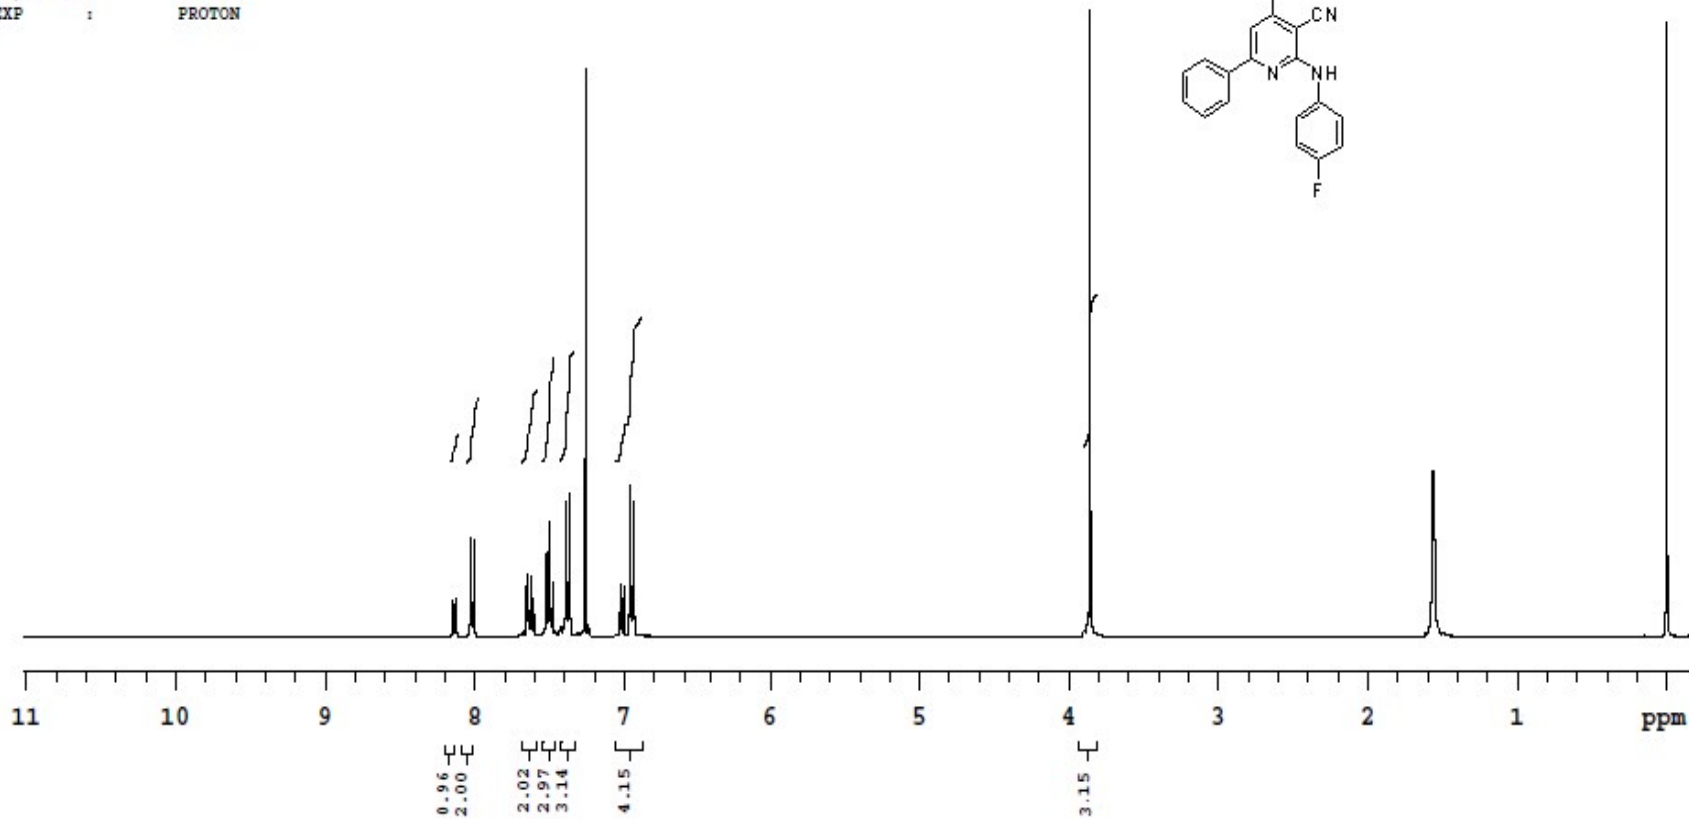

## Elemental Composition Report

### Single Mass Analysis

Tolerance = 5.0 PPM / DBE: min = -1.5, max = 100.0

Element prediction: Off

Number of isotope peaks used for i-FIT = 2

Monoisotopic Mass, Even Electron Ions

58 formula(e) evaluated with 1 results within limits (up to 10 closest results for each mass)

Elements Used:

C: 0-27 H: 0-30 N: 0-5 O: 0-2 F: 0-1

C263/MALO1/061

151016008 22 (0.412) Cm (21:22)

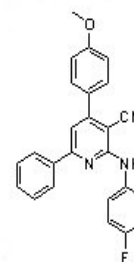

1: TOF MS ES+  
2.19e+004

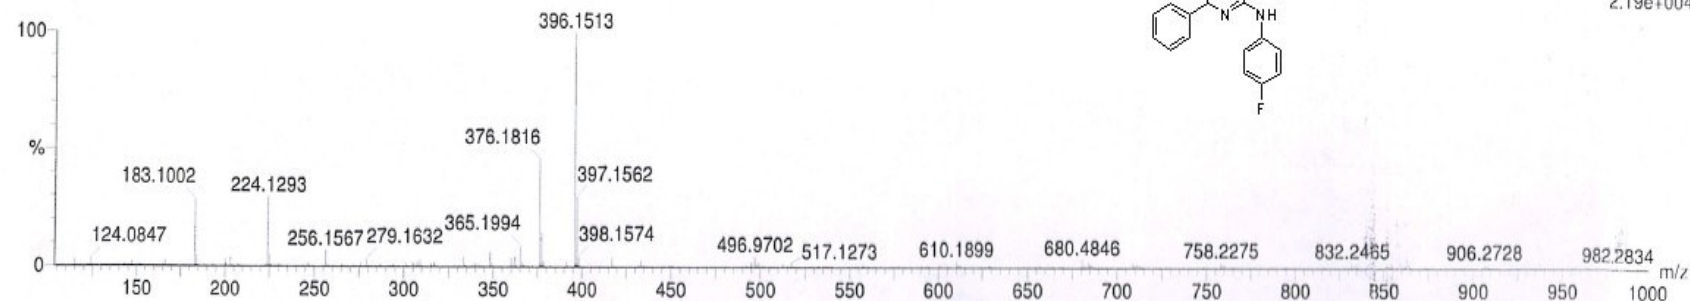

Minimum: -1.5  
Maximum: 5.0 5.0 100.0

| Mass     | Calc. Mass | mDa | PPM | DBE  | i-FIT | Formula        |
|----------|------------|-----|-----|------|-------|----------------|
| 396.1513 | 396.1512   | 0.1 | 0.3 | 17.5 | 1.6   | C25 H19 N3 O F |

TDC-206 C263/MAL01/061

A.R.No: ME0216/963

Analyst : Mallikarjun  
Solvent : cdcl3  
Date : Feb 11 2016  
NUCLEUS : C13  
FRQ (MHz): 100.65  
EXP : CARBON

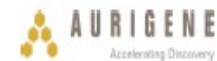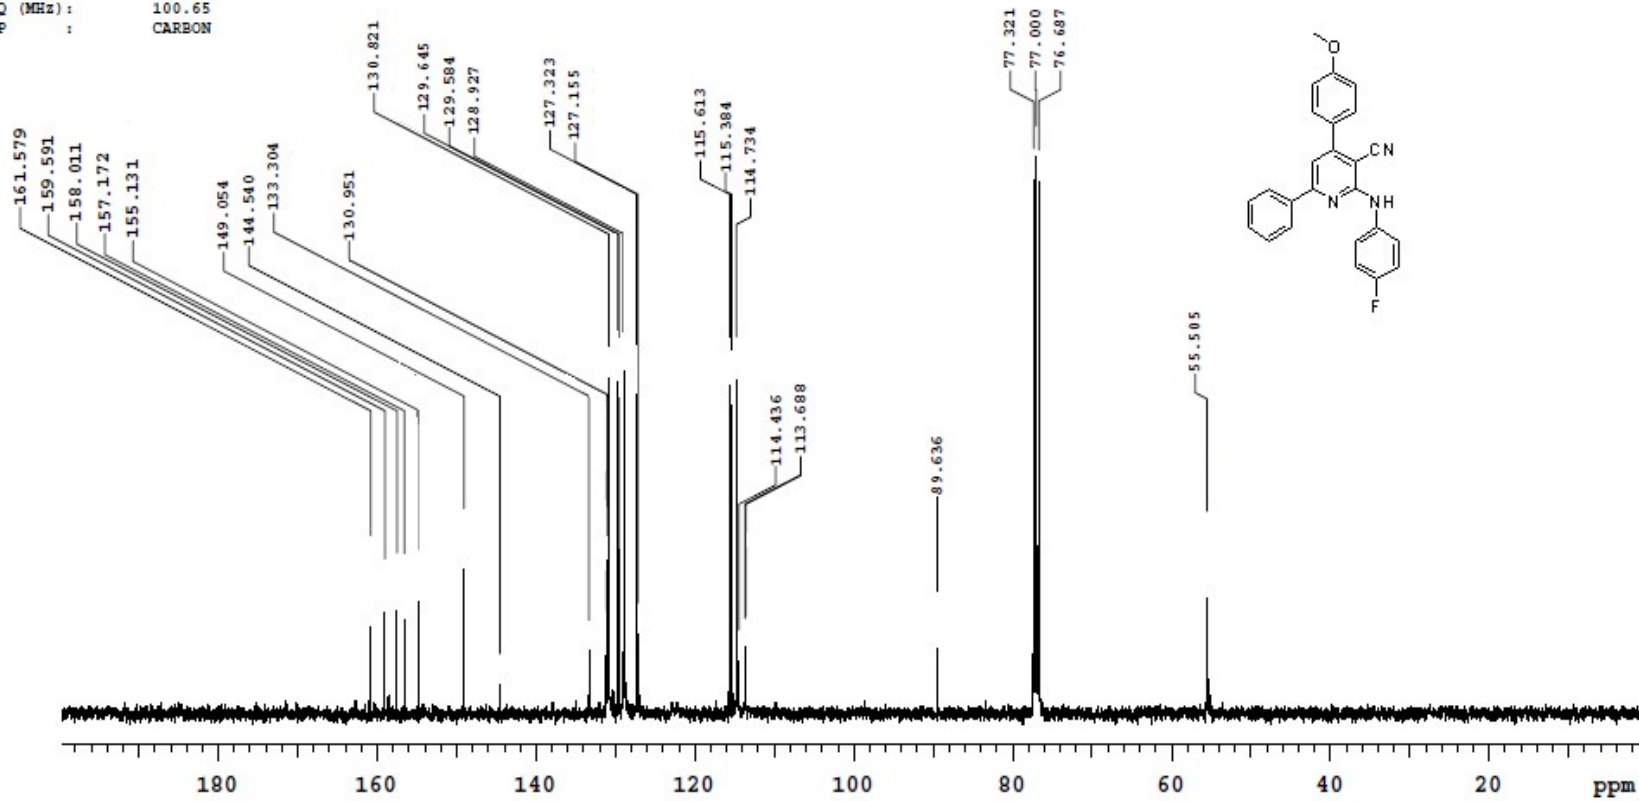

6-Phenyl-2-(phenylamino)-4-(thiophen-2-yl)nicotinonitrile

TDC-206 C263/MAL01/063

AR.No: ME0815/2418

Analyst : Mallikarjun  
Solvent : cdcl3  
Date : Aug 25 2015  
NUCLEUS : H1  
FRQ (MHz): 400.22  
EXP : PROTON

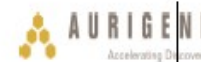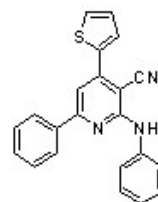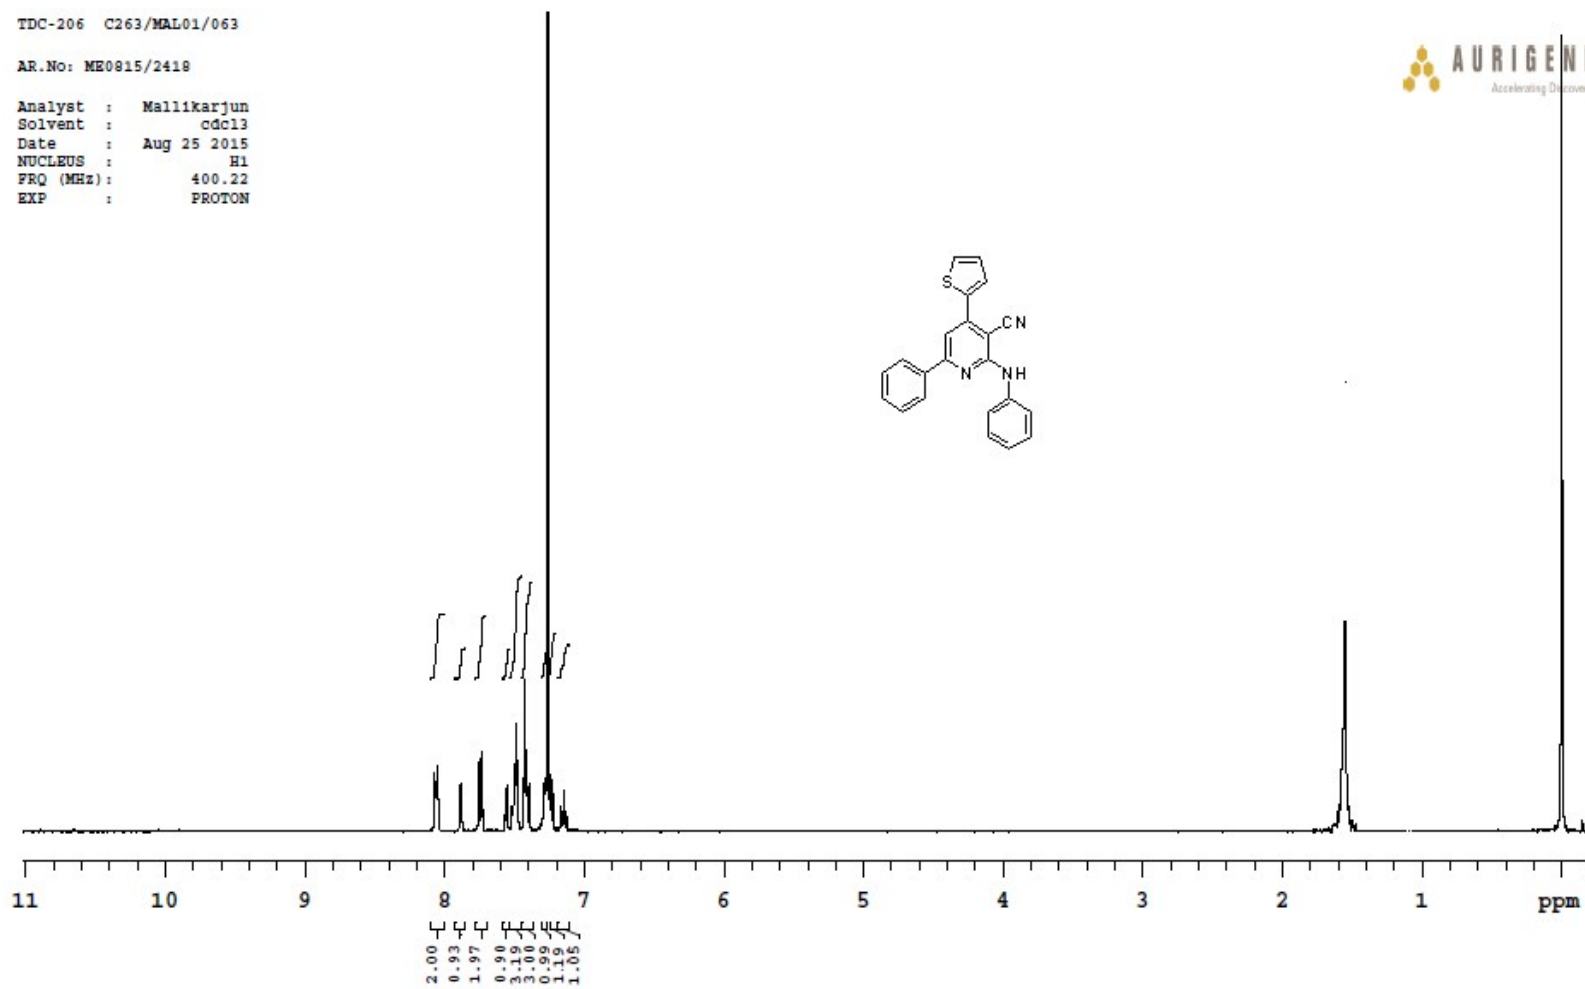

TDC-206 C263/MAL01/063

AR.No: ME1215/549

Analyst : Mallikarjun  
Solvent : cdcl3  
Date : Dec 5 2015  
NUCLEUS : C13  
FRQ (MHz): 100.65  
EXP : CARBON

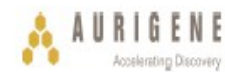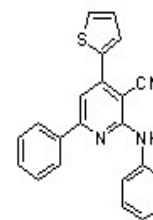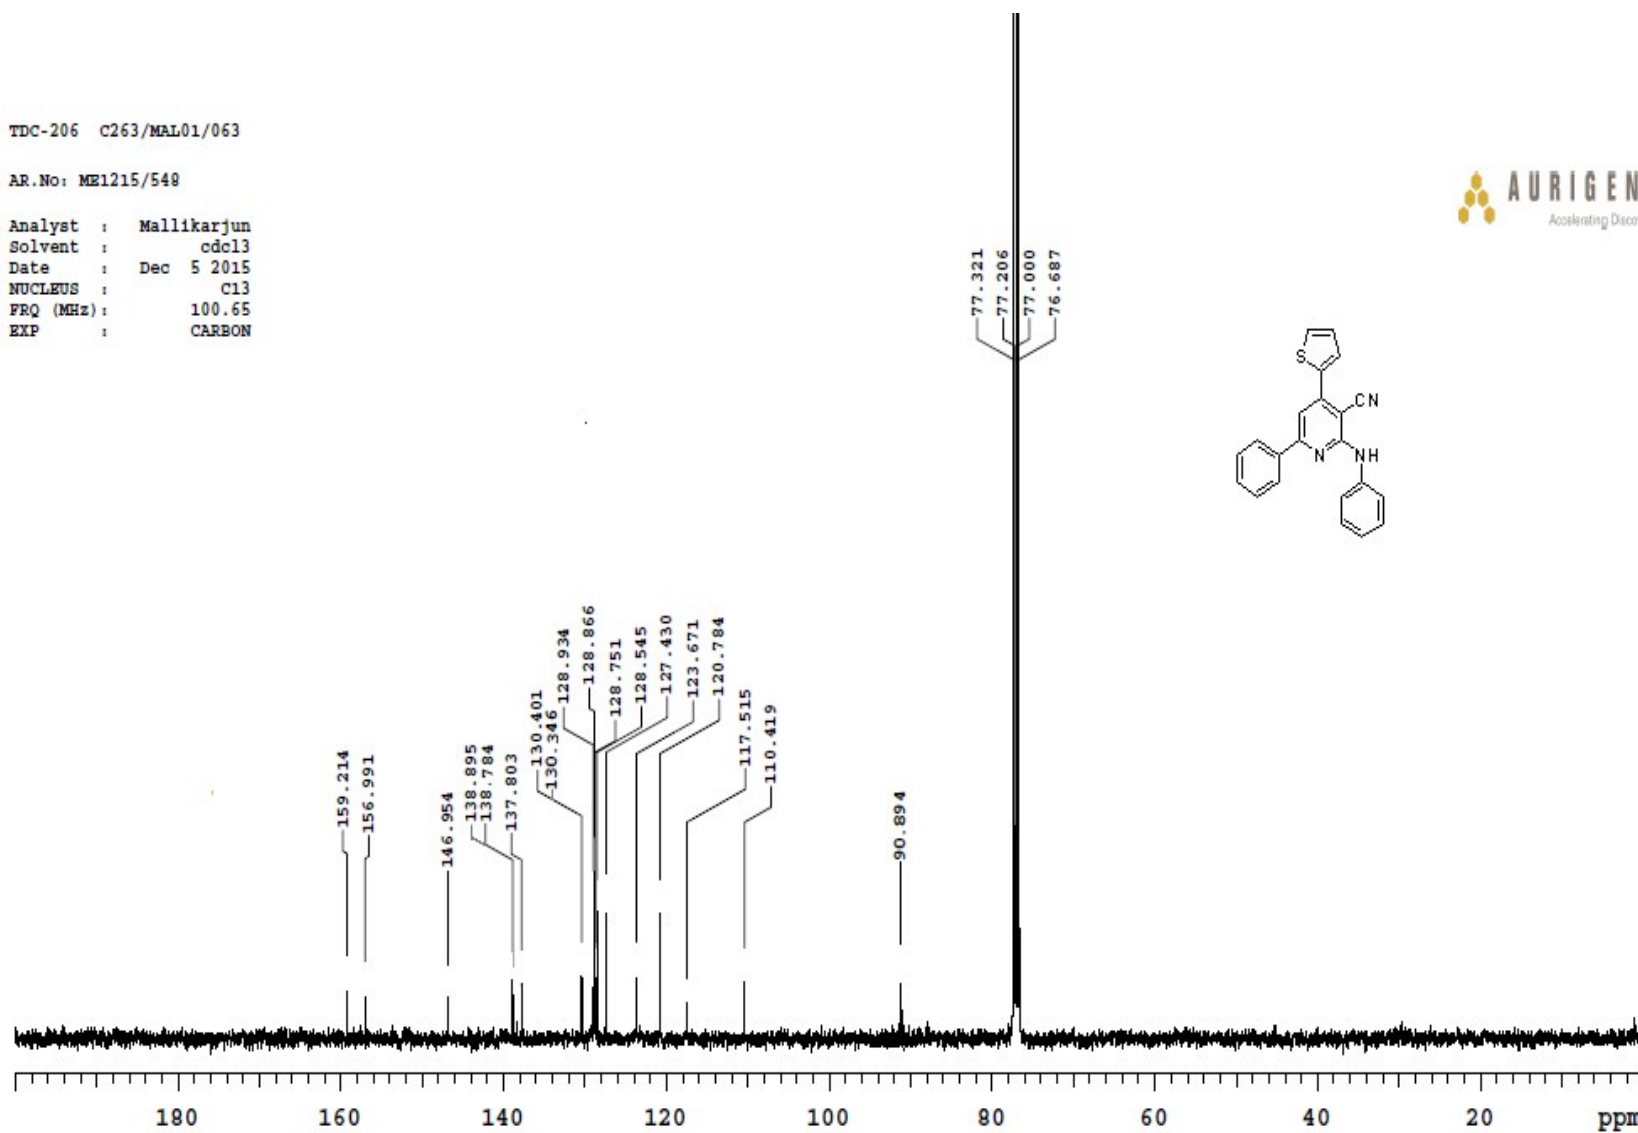



## Elemental Composition Report

### Single Mass Analysis

Tolerance = 5.0 PPM / DBE: min = -1.5, max = 100.0

Element prediction: Off

Number of isotope peaks used for i-FIT = 2

Monoisotopic Mass, Even Electron Ions

20 formula(e) evaluated with 1 results within limits (all results (up to 1000) for each mass)

Elements Used:

C: 0-25 H: 0-17 N: 0-5 S: 0-2

C263/MALO1/063

160122006 54 (1.003) Cm (51:54-79:87x0.500)

1: TOF MS ES+  
1.75e+003

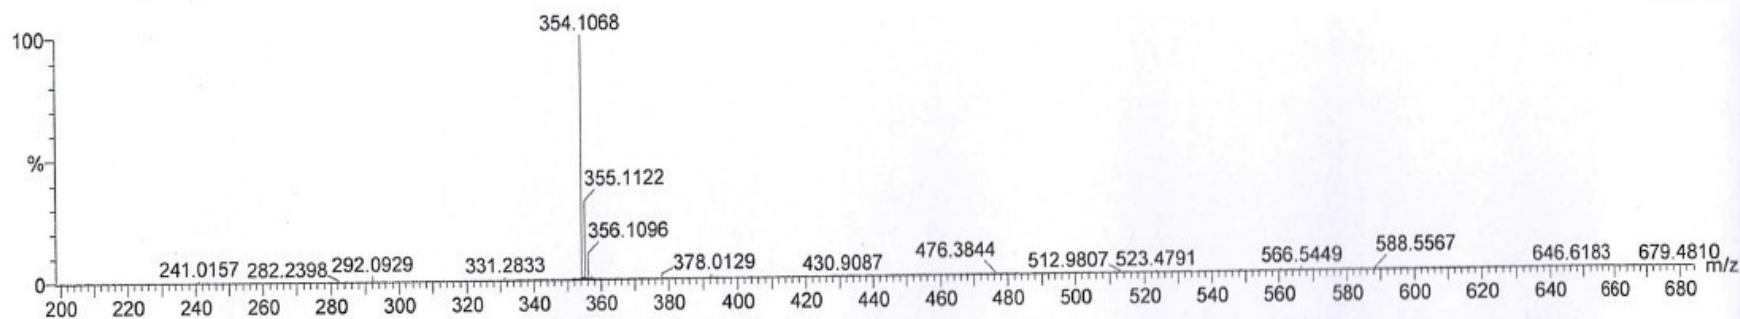

Minimum: -1.5  
Maximum: 5.0 5.0 100.0

| Mass     | Calc. Mass | mDa | PPM | DBE  | i-FIT | Formula      |
|----------|------------|-----|-----|------|-------|--------------|
| 354.1068 | 354.1065   | 0.3 | 0.8 | 16.5 | 6.4   | C22 H16 N3 S |

# 4-Isobutyl-6-phenyl-2-(o-tolylamino)nicotinonitrile

TDC-206 C263/MAL01/064

AR.No: ME0915/373

Analyst : Mallikarjun  
Solvent : cdcl3  
Date : Sep 9 2015  
NUCLEUS : H1  
PRQ (MHz): 400.22  
EXP : PROTON

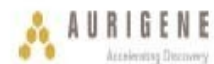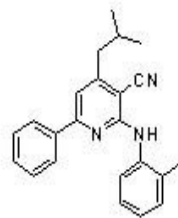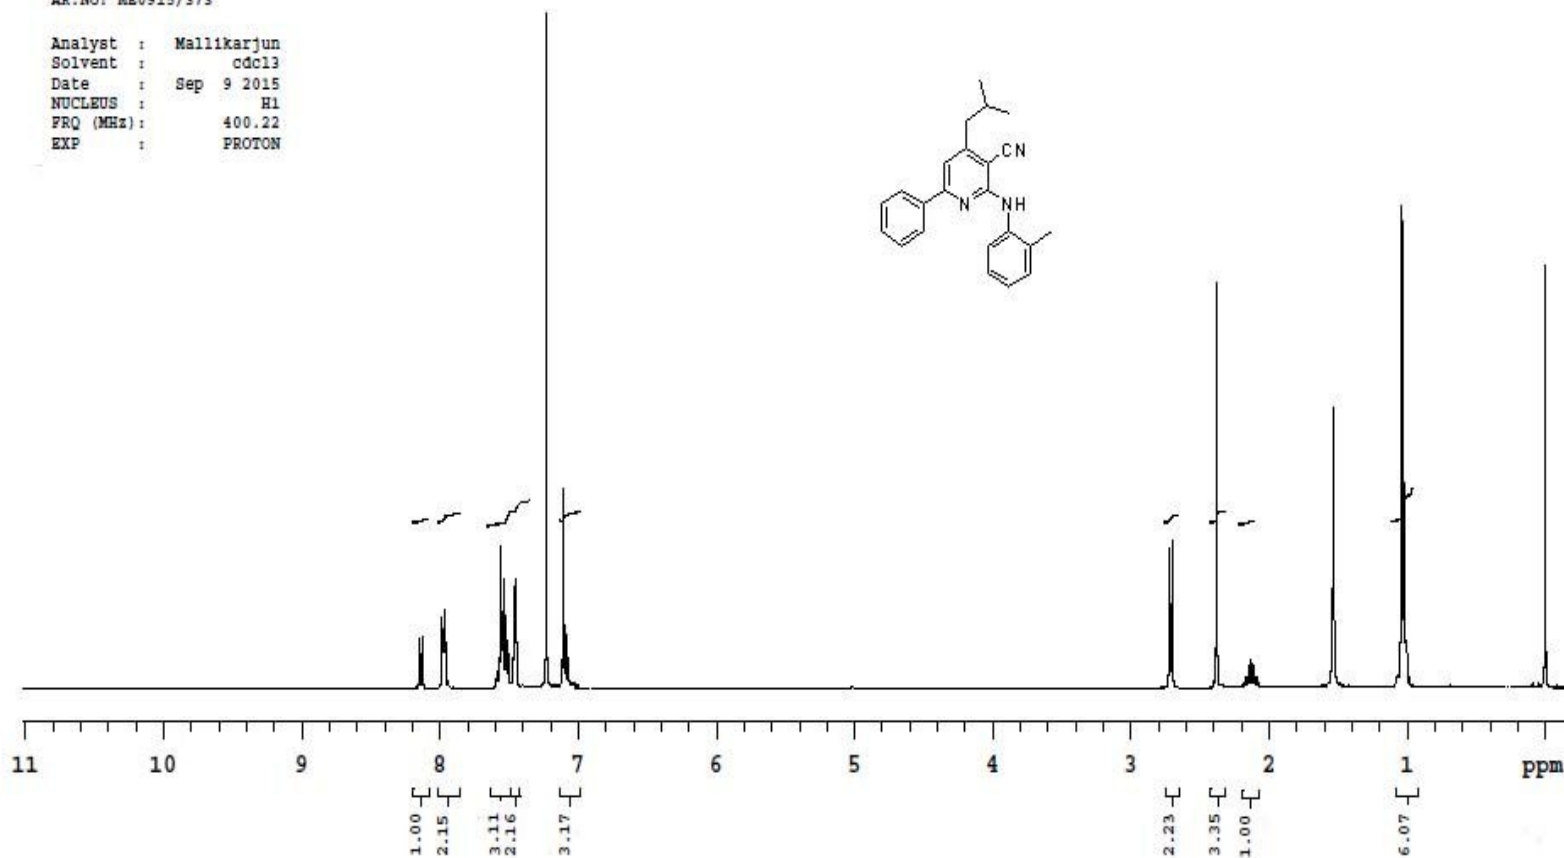

## Elemental Composition Report

Page 1

### Single Mass Analysis

Tolerance = 5.0 PPM / DBE: min = -1.5, max = 100.0

Element prediction: Off

Number of isotope peaks used for i-FIT = 2

Monoisotopic Mass, Even Electron Ions

48 formula(e) evaluated with 1 results within limits (up to 10 closest results for each mass)

Elements Used:

C: 0-30 H: 0-30 N: 0-5 O: 0-2

C263/MALO1/064

151119005 21 (0.400) Cm (21:24)

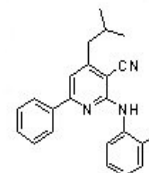

1: TOF MS ES+  
1.87e+005

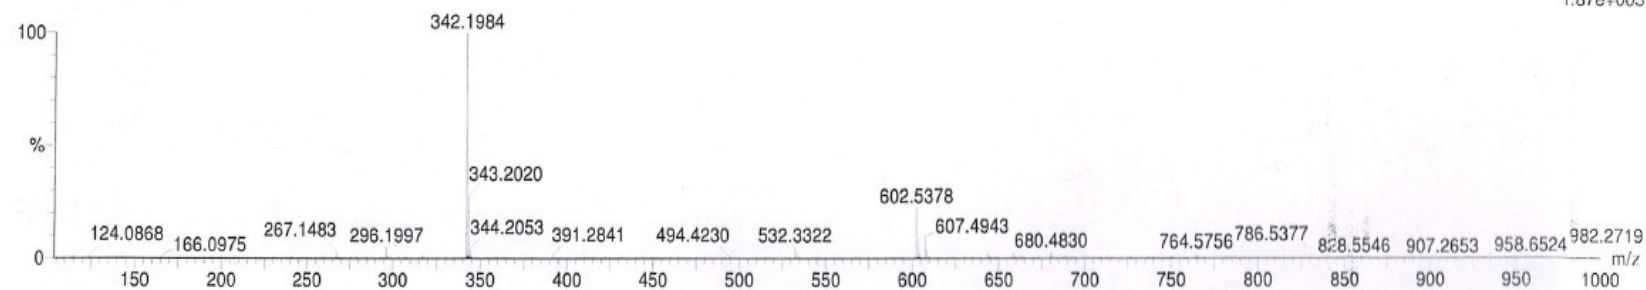

Minimum: -1.5  
Maximum: 5.0 5.0 100.0

| Mass     | Calc. Mass | mDa | PPM | DBE  | i-FIT | Formula    |
|----------|------------|-----|-----|------|-------|------------|
| 342.1984 | 342.1970   | 1.4 | 4.1 | 13.5 | 25.2  | C23 H24 N3 |

TDC-206 C263/MAL01/064

AR.No: ME1215/266

Analyst : Mallikarjun  
Solvent : cdcl3  
Date : Dec 2 2015  
NUCLEUS : C13  
FRQ (MHz): 100.65  
EXP : CARBON

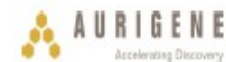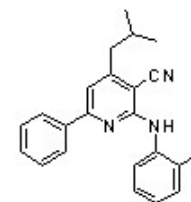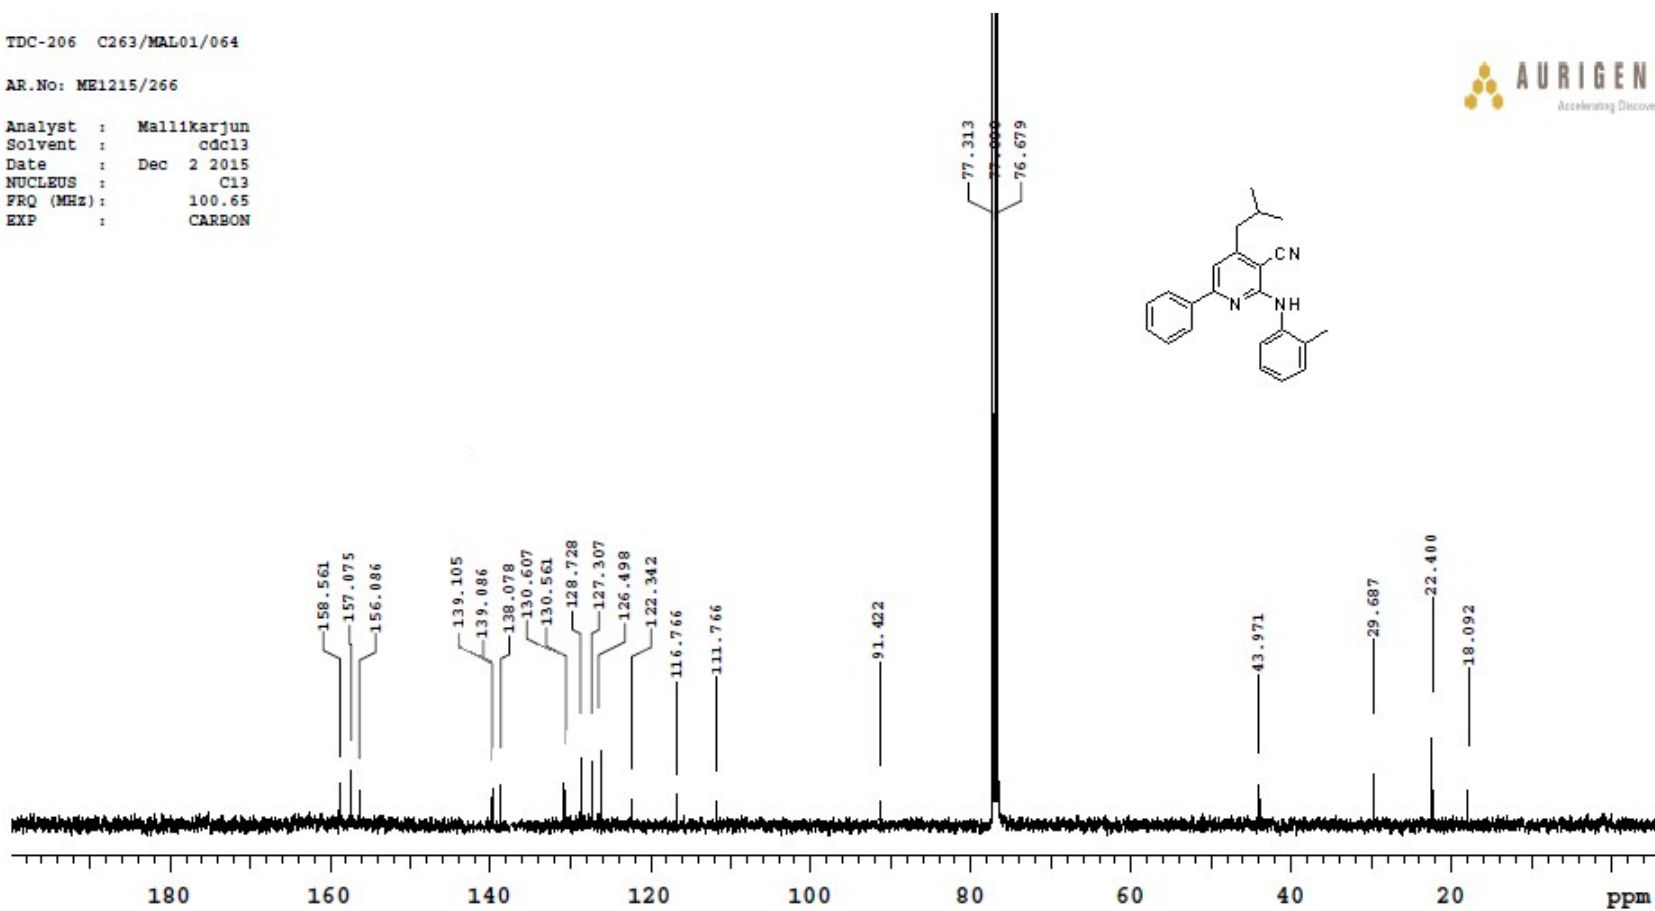

6-(4-Methoxyphenyl)-4-phenyl-2-(o-tolylamino)nicotinonitrile

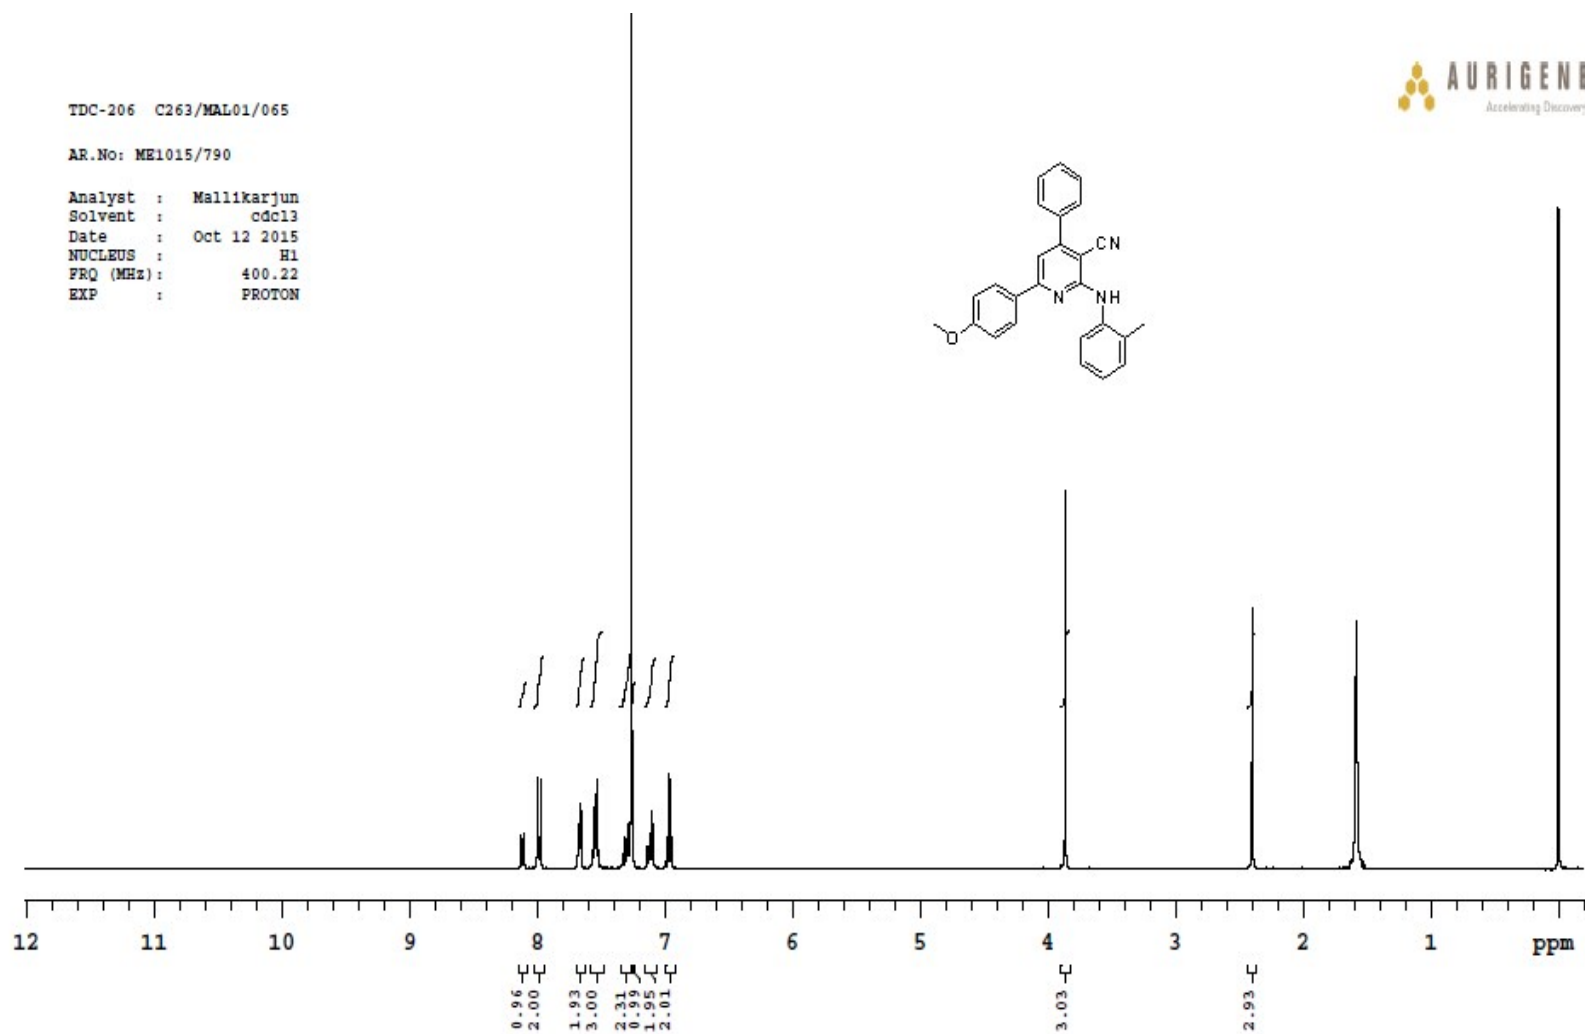

## Elemental Composition Report

### Single Mass Analysis

Tolerance = 5.0 PPM / DBE: min = -1.5, max = 100.0

Element prediction: Off

Number of isotope peaks used for i-FIT = 2

Monoisotopic Mass, Even Electron Ions

63 formula(e) evaluated with 1 results within limits (up to 10 closest results for each mass)

Elements Used:

C: 0-27 H: 0-30 N: 0-5 O: 0-2 F: 0-1

C263/MALO1/065

151016009 73 (1.358) Cm (73:74)

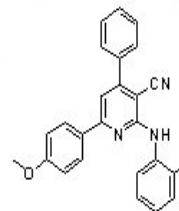

1: TOF MS ES+  
1.43e+004

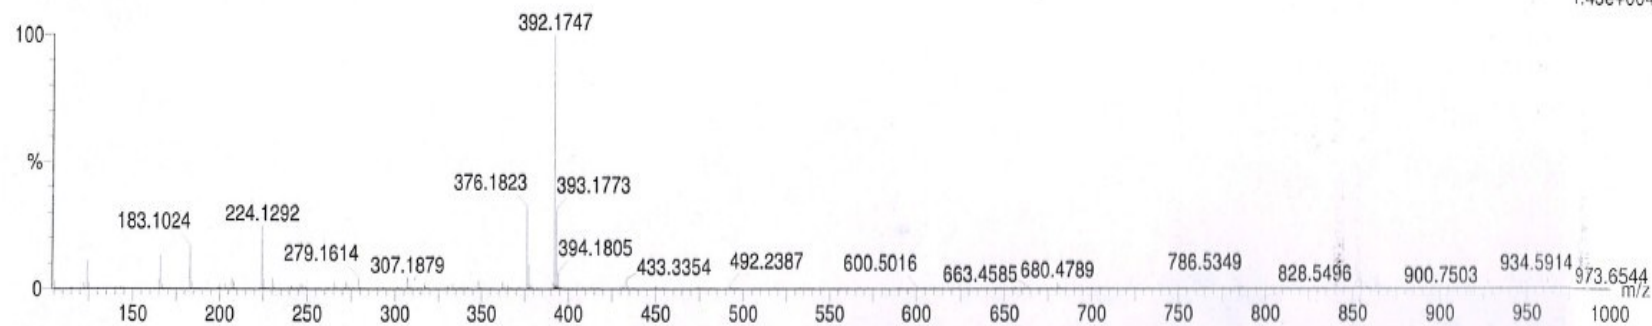

Minimum: -1.5  
Maximum: 5.0 5.0 100.0

| Mass     | Calc. Mass | mDa  | PPM  | DBE  | i-FIT | Formula      |
|----------|------------|------|------|------|-------|--------------|
| 392.1747 | 392.1763   | -1.6 | -4.1 | 17.5 | 1.6   | C26 H22 N3 O |

TDC-206 C263/MAL01/065

AR.No: ME1015/1391

Analyst : Mallikarjun  
Solvent : cdcl3  
Date : Oct 17 2015  
NUCLEUS : C13  
FRQ (MHz): 100.65  
EXP : CARBON

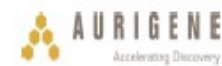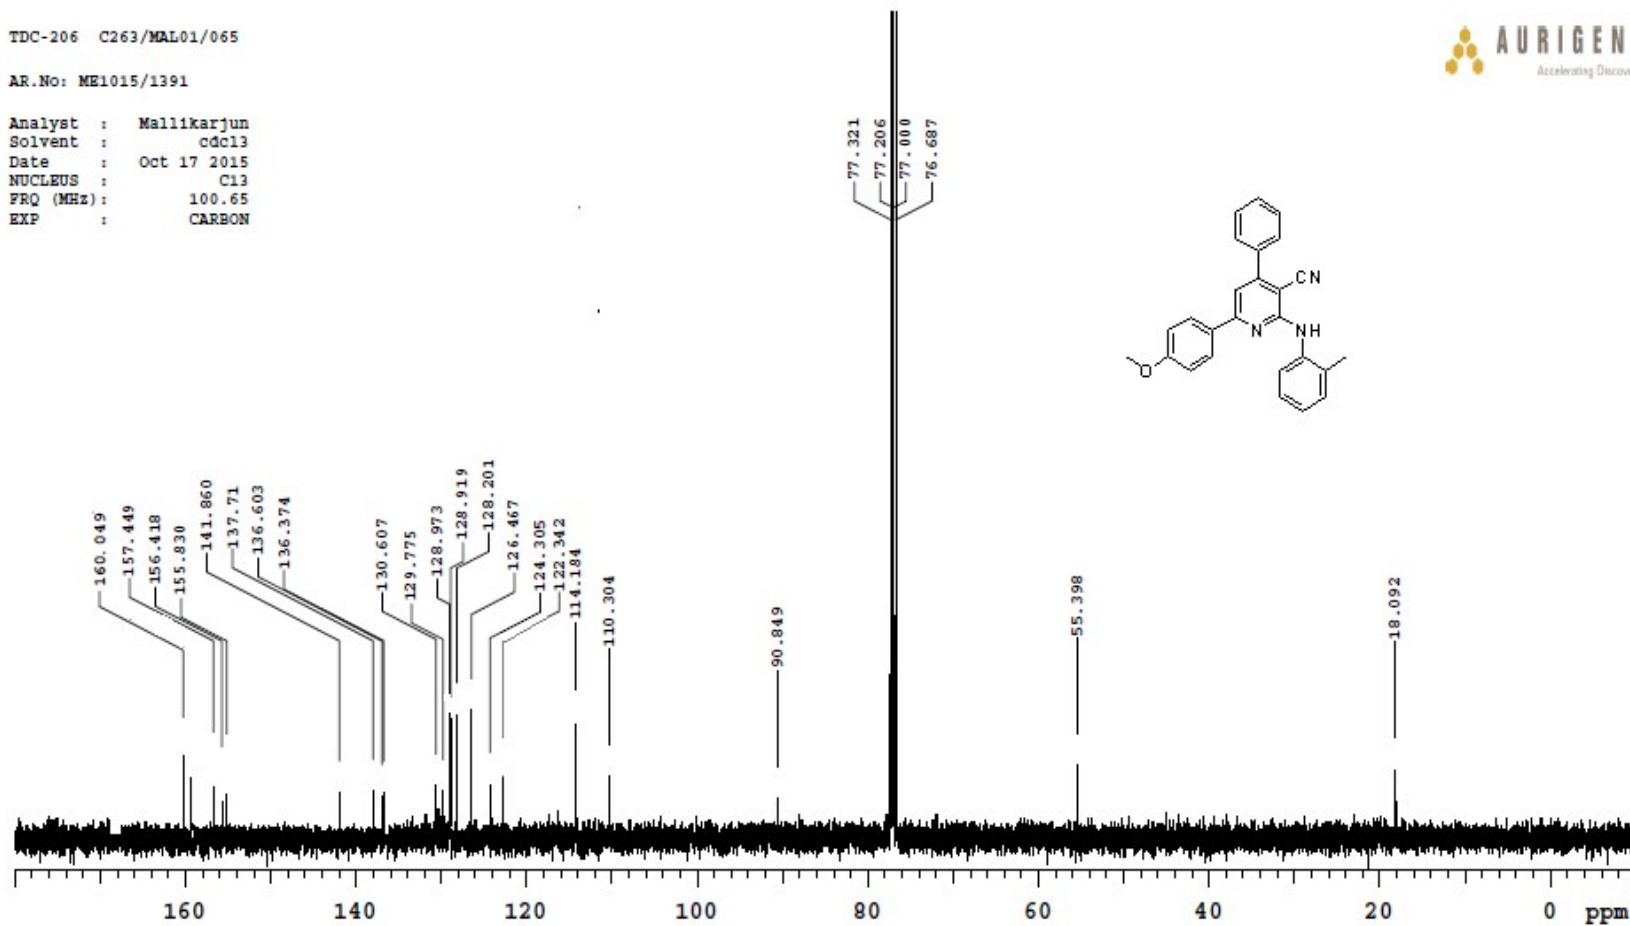

4-Isobutyl-6-phenyl-2-(phenylamino)nicotinonitrile

TDC-206 C263/MAL01/071(A)

AR.No: ME0915/2190

Analyst : Mallikarjun  
Solvent : cdcl3  
Date : Sep 30 2015  
NUCLEUS : H1  
PRQ (MHz): 400.22  
EXP : PROTON

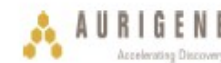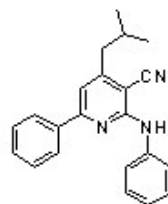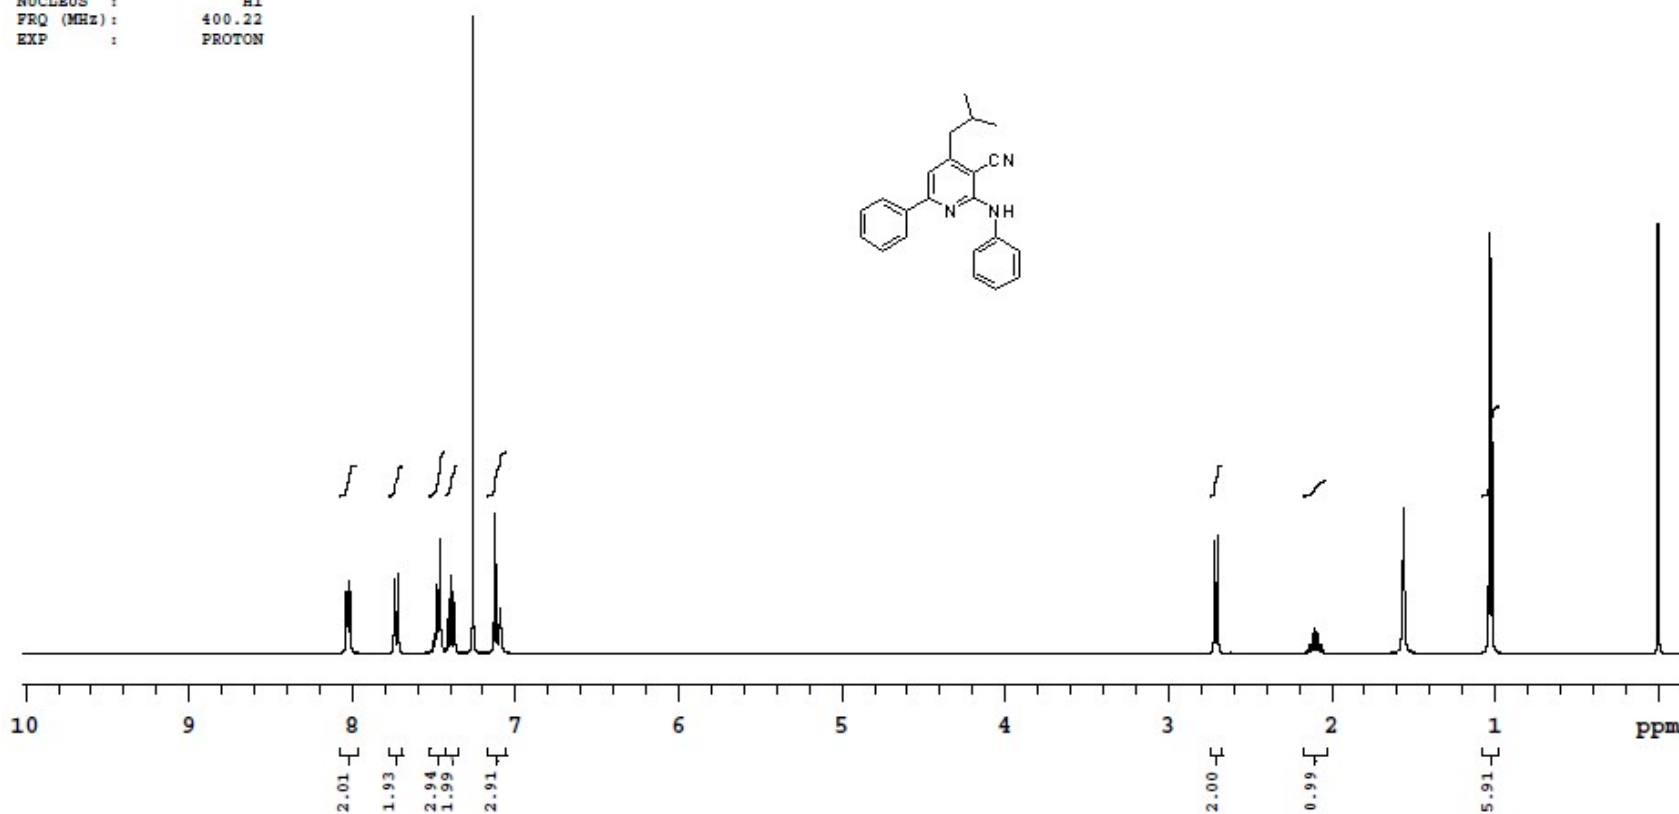



## Elemental Composition Report

### Single Mass Analysis

Tolerance = 10.0 PPM / DBE: min = -1.5, max = 100.0

Element prediction: Off

Number of isotope peaks used for i-FIT = 2

Monoisotopic Mass, Even Electron Ions

48 formula(e) evaluated with 1 results within limits (up to 10 closest results for each mass)

Elements Used:

C: 0-27 H: 0-30 N: 0-5 O: 0-2

C263/MALO1/071 A

151016011 20 (0.366) Cm (20)

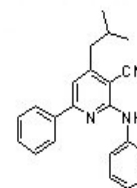

1: TOF MS ES+  
1.77e+005

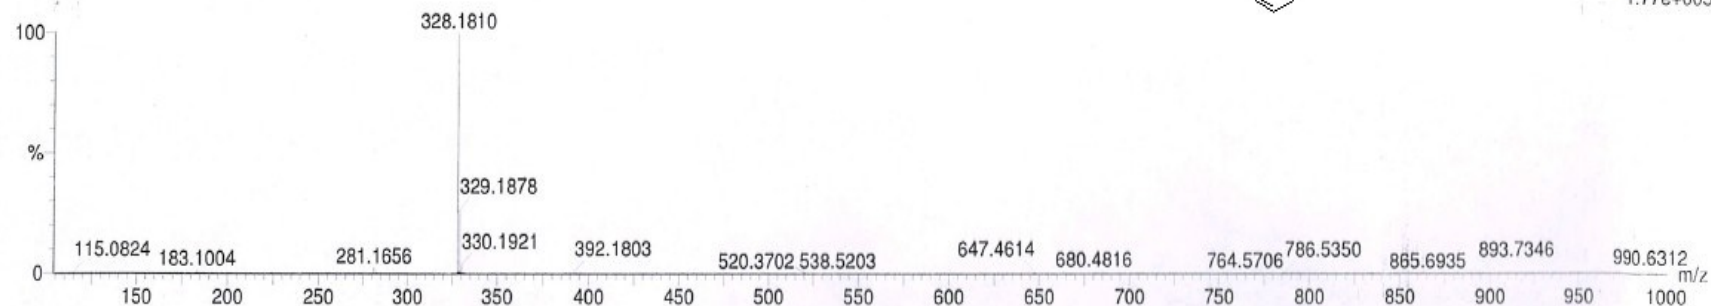

Minimum: -1.5  
Maximum: 5.0 10.0 100.0

| Mass     | Calc. Mass | mDa  | PPM  | DBE  | i-FIT | Formula    |
|----------|------------|------|------|------|-------|------------|
| 328.1810 | 328.1814   | -0.4 | -1.2 | 13.5 | 27.3  | C22 H22 N3 |

TDC-206 C263/MAL01/071-A

AR.No: ME1015/1394

Analyst : Mallikarjun  
Solvent : cdcl3  
Date : Oct 17 2015  
NUCLEUS : C13  
FRQ (MHz): 100.65  
EXP : CARBON

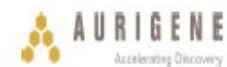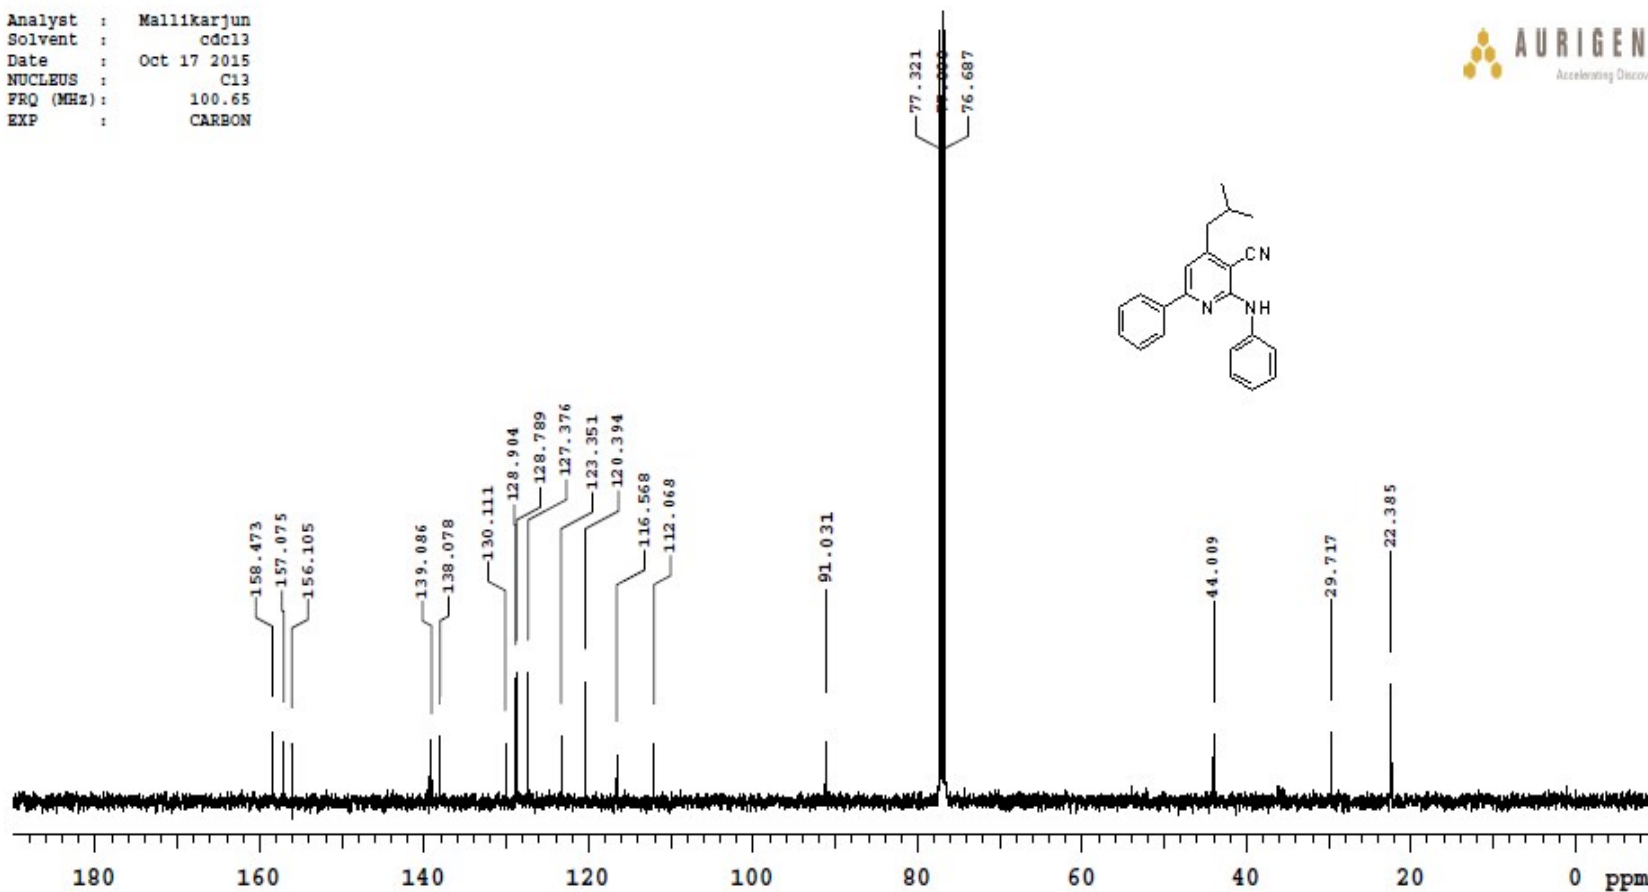

4-(4-Nitrophenyl)-6-phenyl-2-(phenylamino)nicotinonitrile

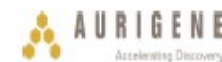

TDC-206 C263/MAL01/071-C

AR.No: ME0915/765

Analyst : Mallikarjun  
Solvent : cdcl3  
Date : Sep 15 2015  
NUCLEUS : H1  
PRQ (MHz): 400.22  
EXP : PROTON

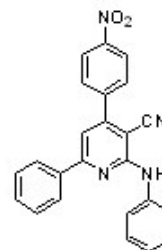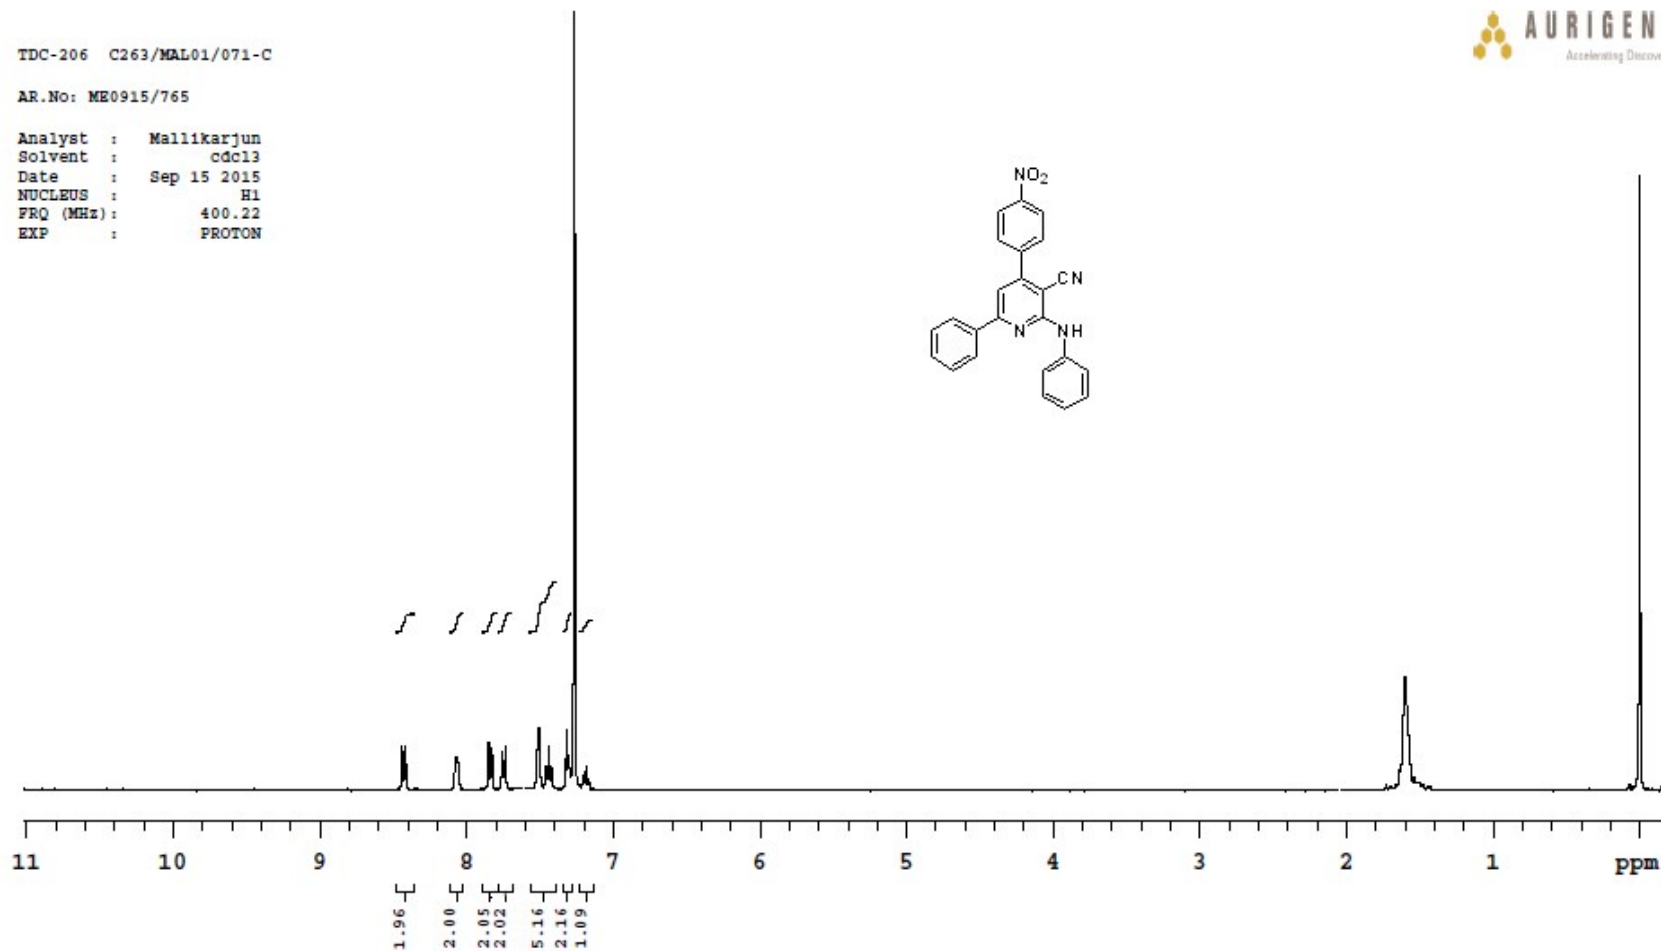

# 4-(4-Nitrophenyl)-6-phenyl-2-(phenylamino)nicotinonitrile

## D<sub>2</sub>O exchange

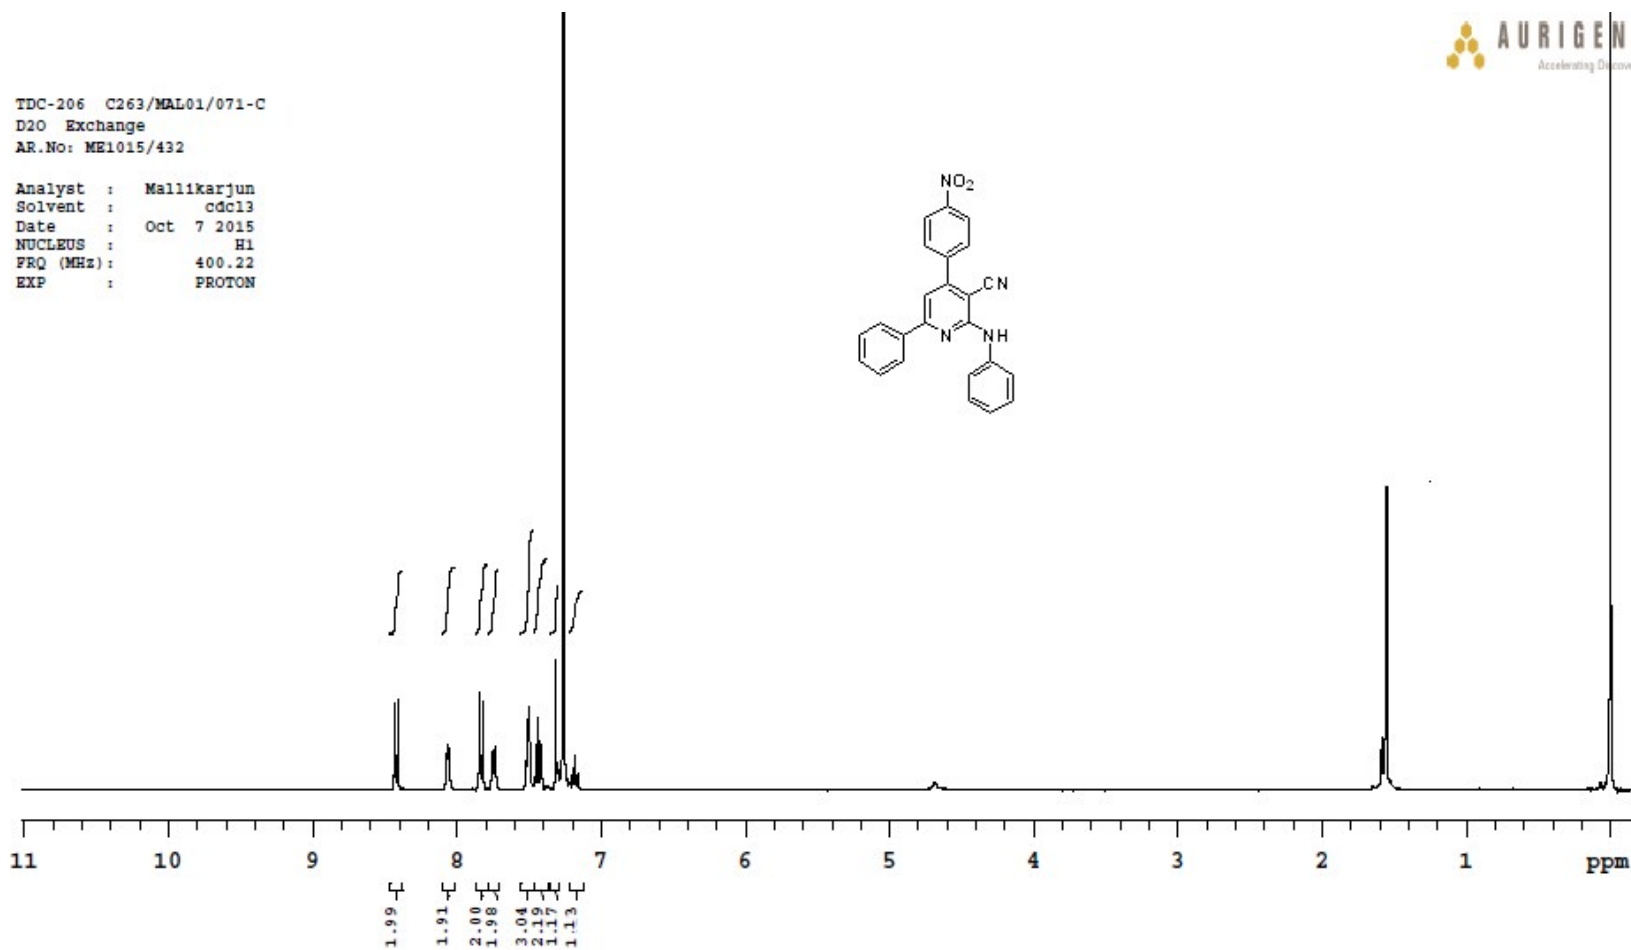

## Elemental Composition Report

### Single Mass Analysis

Tolerance = 10.0 PPM / DBE: min = -1.5, max = 100.0

Element prediction: Off

Number of isotope peaks used for i-FIT = 2

Monoisotopic Mass, Even Electron Ions

25 formula(e) evaluated with 1 results within limits (up to 10 closest results for each mass)

Elements Used:

C: 0-27 H: 0-30 N: 0-5 O: 0-2

C263/MAL01/071 C

151016012 22 (0.412) Cm (22:24-11:13x0.500)

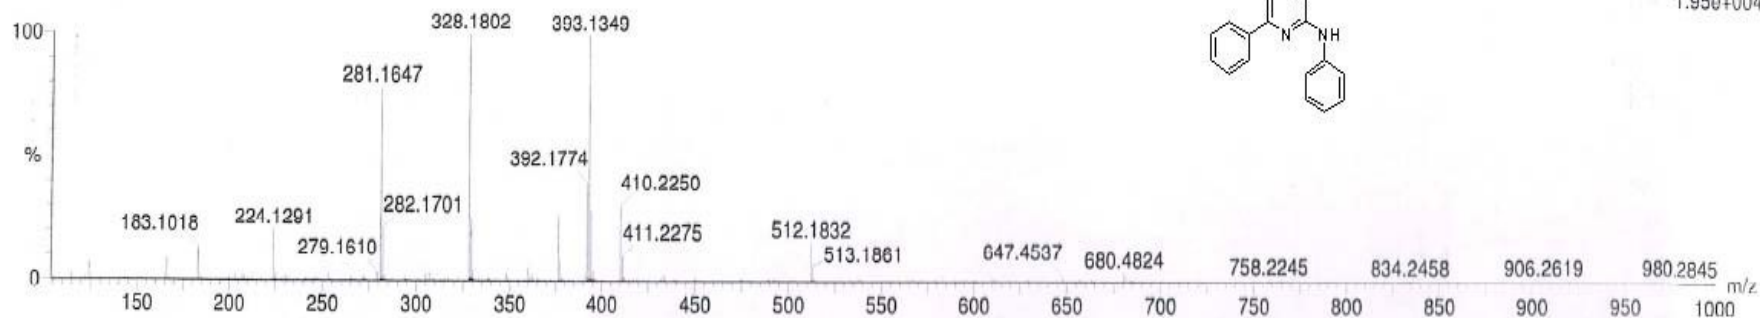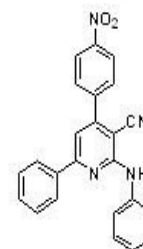

1: TOF MS ES+  
1.95e+004

Minimum: -1.5  
Maximum: 5.0 10.0 100.0

| Mass     | Calc. Mass | mDa  | PPM  | DBE  | i-FIT | Formula                                                       |
|----------|------------|------|------|------|-------|---------------------------------------------------------------|
| 393.1349 | 393.1352   | -0.3 | -0.8 | 18.5 | 0.1   | C <sub>24</sub> H <sub>17</sub> N <sub>4</sub> O <sub>2</sub> |

TDC-206 C263/MAL01/071C

AR.No: ME1215/133

Analyst : Mallikarjun  
Solvent : cdcl3  
Date : Dec 2 2015  
NUCLEUS : C13  
FRQ (MHz): 100.65  
EXP : CARBON

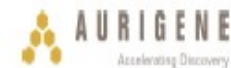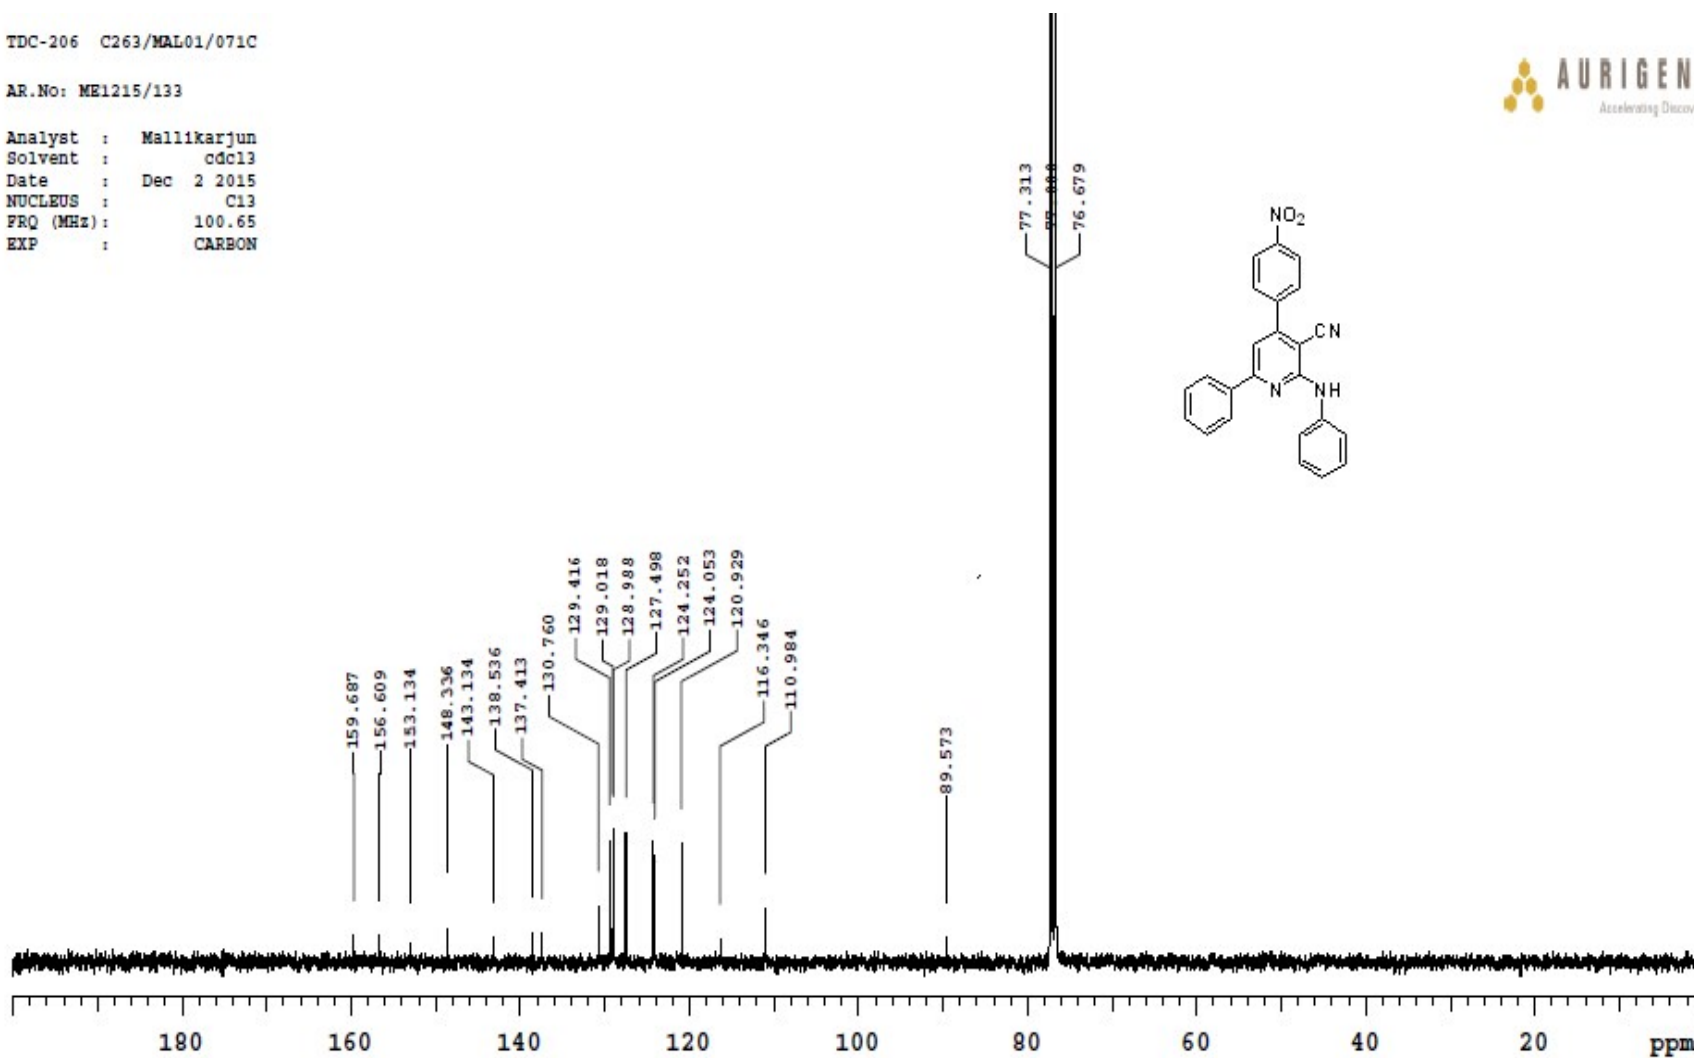

2-((4-Cyanophenyl)amino)-4-(4-methoxyphenyl)-6-phenylnicotinonitrile

TDC-106 C263/MAL01/073A

AR.No: ME1115/2247

Analyst : Mallikarjun  
Solvent : cdcl3  
Date : Nov 25 2015  
NUCLEUS : H1  
FRQ (MHz): 400.22  
EXP : PROTON

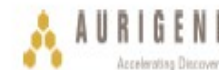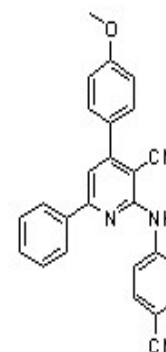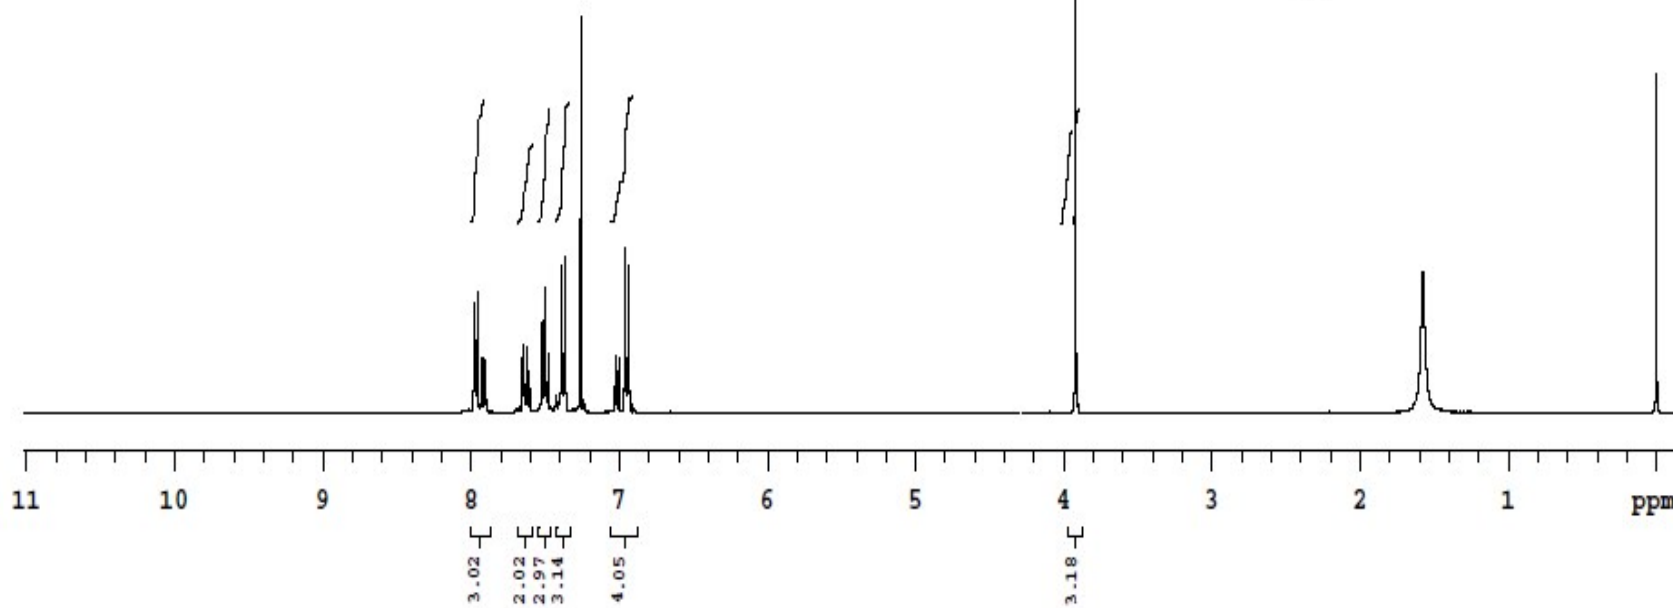

## Elemental Composition Report

### Single Mass Analysis

Tolerance = 5.0 PPM / DBE: min = -1.5, max = 100.0

Element prediction: Off

Number of isotope peaks used for i-FIT = 2

Monoisotopic Mass, Even Electron Ions

24 formula(e) evaluated with 1 results within limits (up to 10 closest results for each mass)

Elements Used:

C: 0-30 H: 0-20 N: 0-5 O: 0-2

C263/MALO1/073 A

151119003 19 (0.352) Cm (17:20)

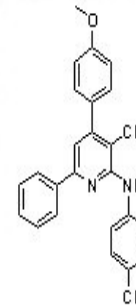

1: TOF MS ES+  
1.54e+004

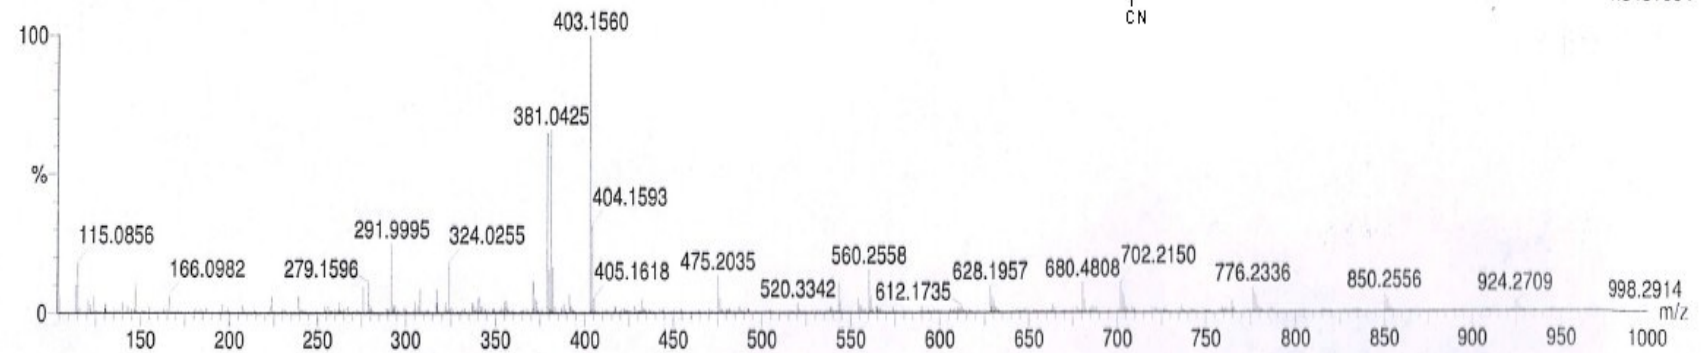

Minimum: -1.5  
Maximum: 5.0 5.0 100.0

| Mass     | Calc. Mass | mDa | PPM | DBE  | i-FIT | Formula      |
|----------|------------|-----|-----|------|-------|--------------|
| 403.1560 | 403.1559   | 0.1 | 0.2 | 19.5 | 3.0   | C26 H19 N4 O |



TDC-206 C263/MAL01/073(A)

AR.No: ME1215/1864

Analyst : Mallikarjun  
Solvent : cdcl3  
Date : Dec 19 2015  
NUCLEUS : C13  
FRQ (MHz): 100.65  
EXP : CARBON

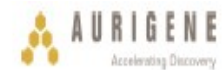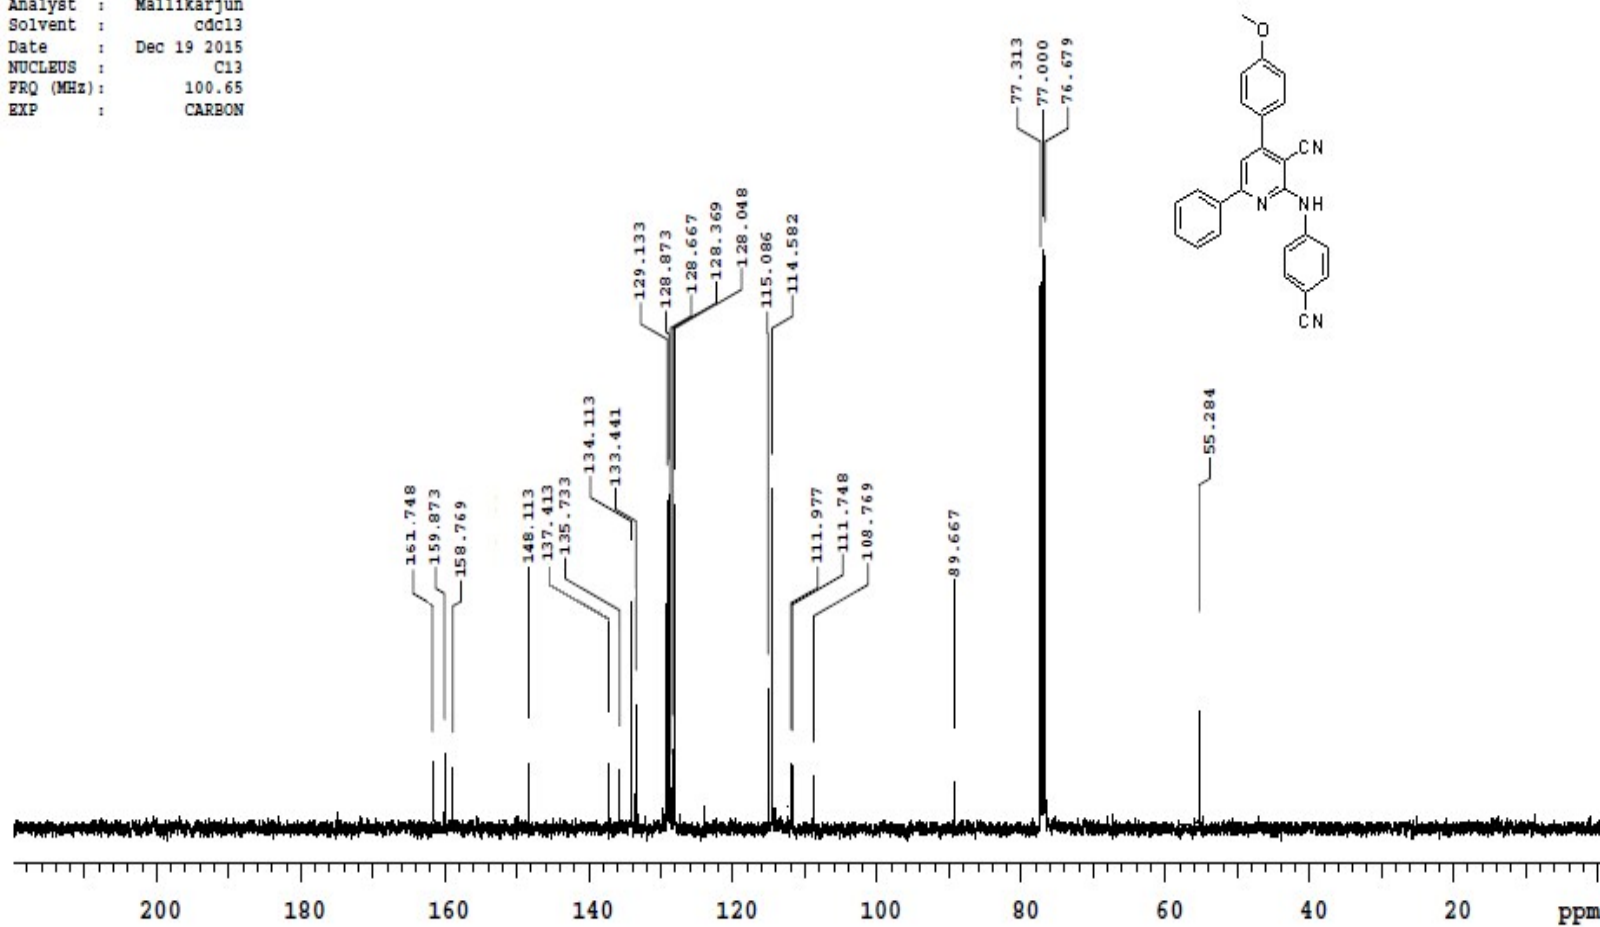

2-((4-Bromophenyl)amino)-6-phenyl-4-(thiophen-2-yl)nicotinonitrile

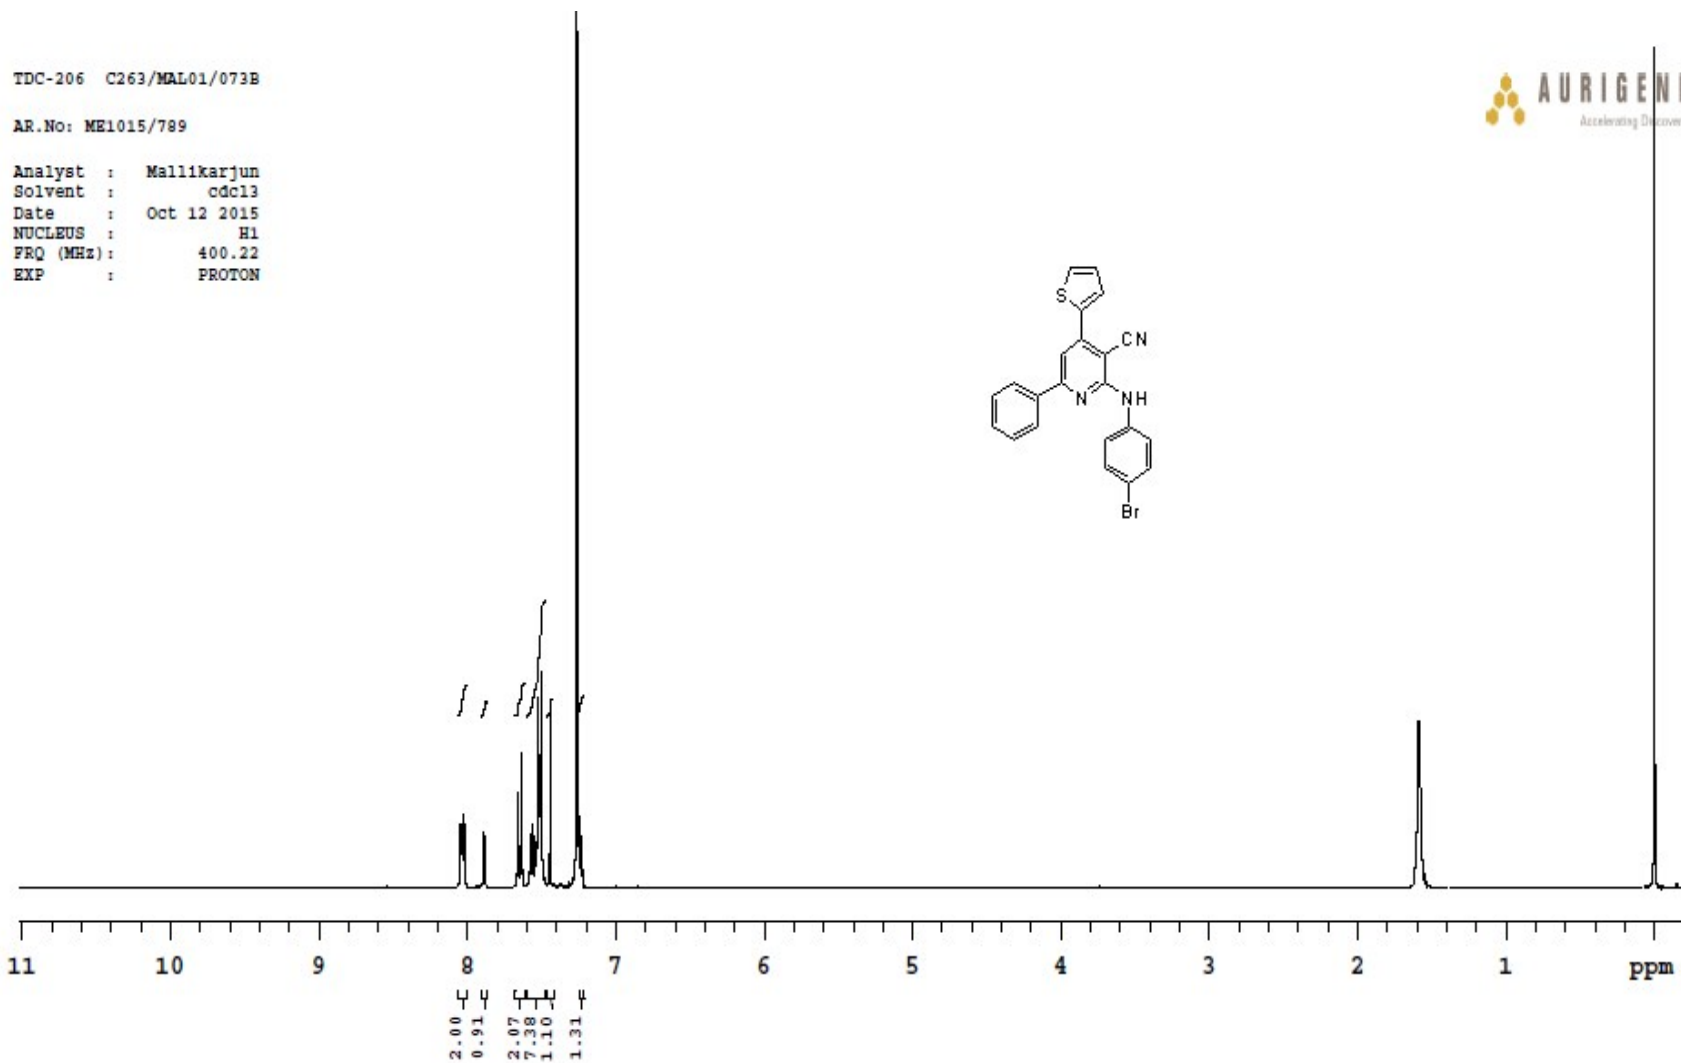

## Elemental Composition Report

### Single Mass Analysis

Tolerance = 10.0 PPM / DBE: min = -1.5, max = 100.0

Element prediction: Off

Number of isotope peaks used for i-FIT = 2

Monoisotopic Mass, Even Electron Ions

127 formula(e) evaluated with 1 results within limits (up to 10 closest results for each mass)

Elements Used:

C: 0-27 H: 0-30 N: 0-5 O: 0-2 S: 0-1 Br: 0-1

C263/MALO1/073 B

151016013 21 (0.399) Cm (21:26-5:11x0.500)

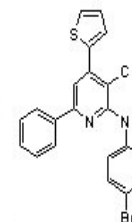

1: TOF MS ES+  
2.74e+004

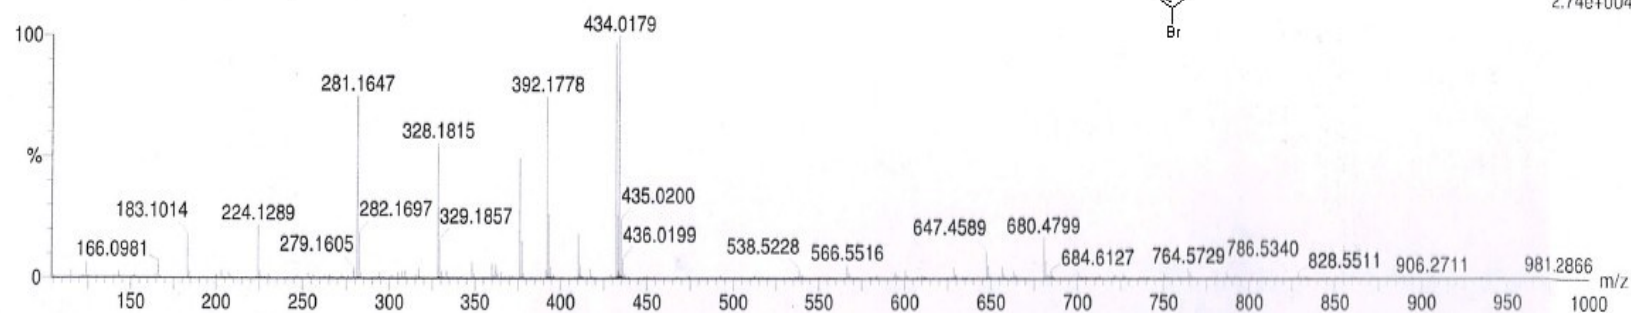

Minimum: -1.5  
Maximum: 5.0 10.0 100.0

| Mass     | Calc. Mass | mDa | PPM | DBE  | i-FIT | Formula         |
|----------|------------|-----|-----|------|-------|-----------------|
| 432.0199 | 432.0170   | 2.9 | 6.7 | 16.5 | 4.4   | C22 H15 N3 S Br |

TDC-206 C263/MAL01/073 B

AR.No: ME1215/530

Analyst : Mallikarjun  
Solvent : cdcl3  
Date : Dec 5 2015  
NUCLEUS : C13  
FRQ (MHz): 100.65  
EXP : CARBON

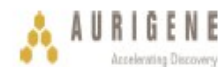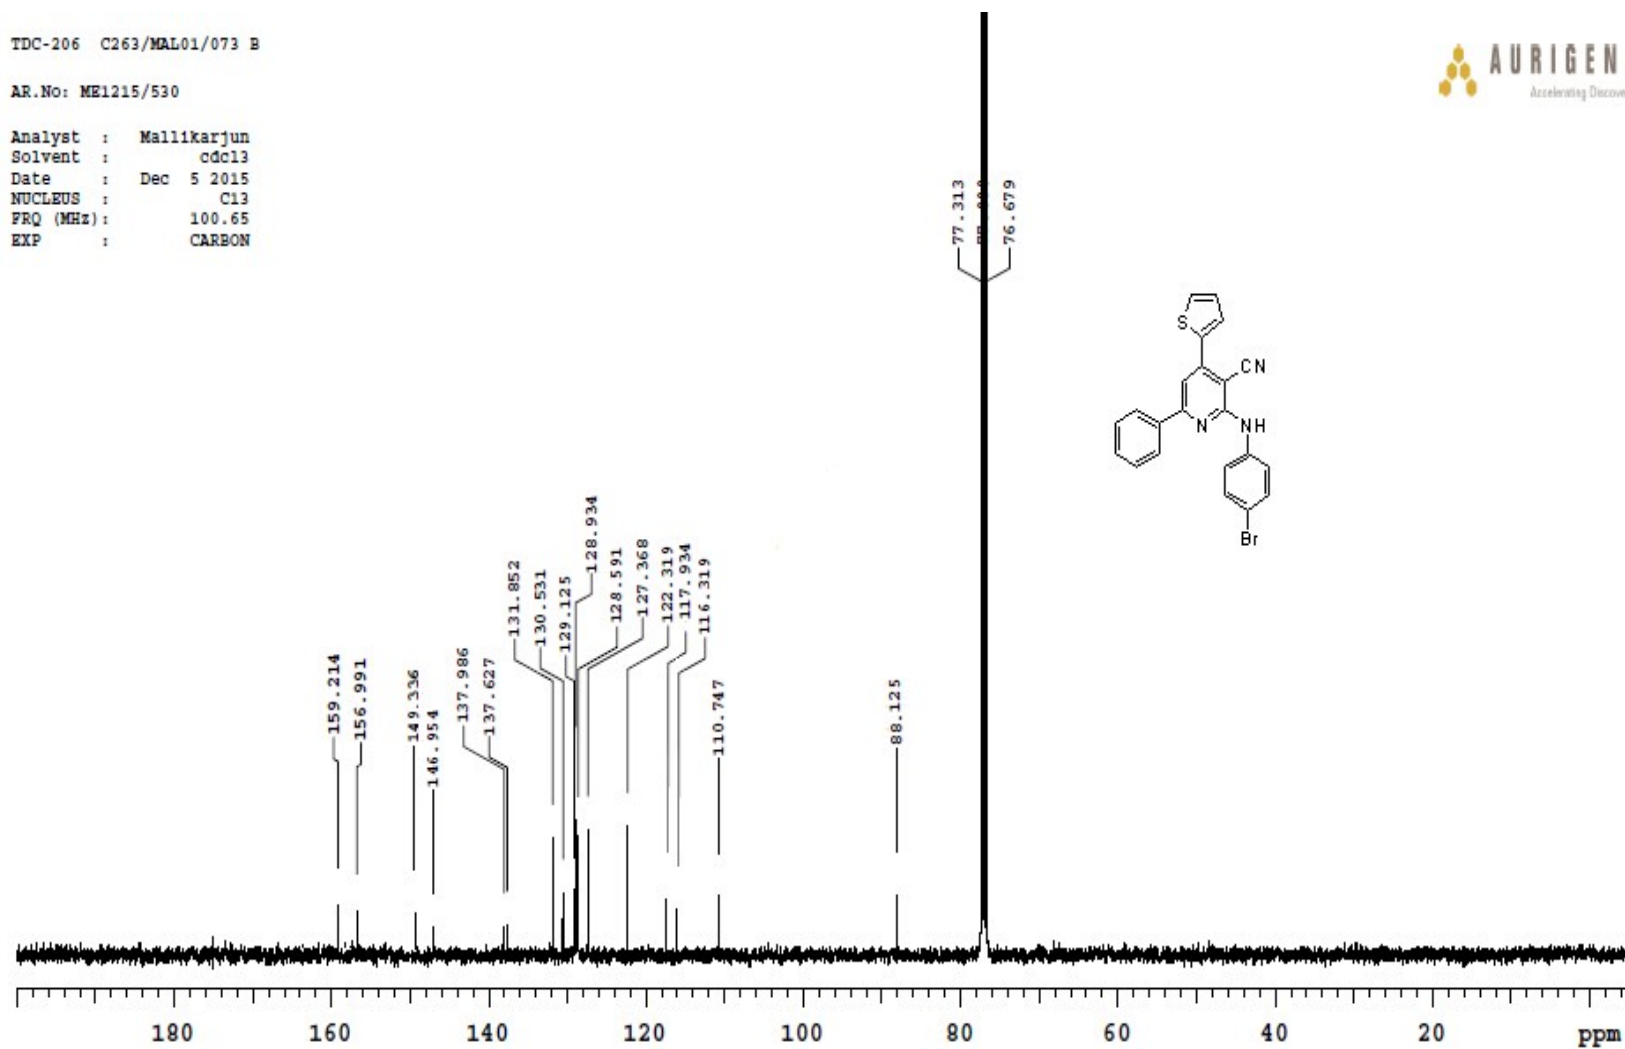

# 6-(4-Chlorophenyl)-2-((2,3-dimethylphenyl)amino)-4-phenylnicotinonitrile

TDC-206 C263/MAL01/073-C

AR.No: ME1015/361

Analyst : Mallikarjun  
Solvent : cdCl3  
Date : Oct 6 2015  
NUCLEUS : H1  
PRQ (MHz): 400.22  
EXP : PROTON

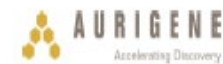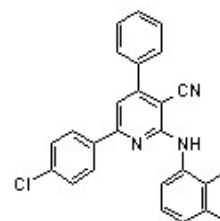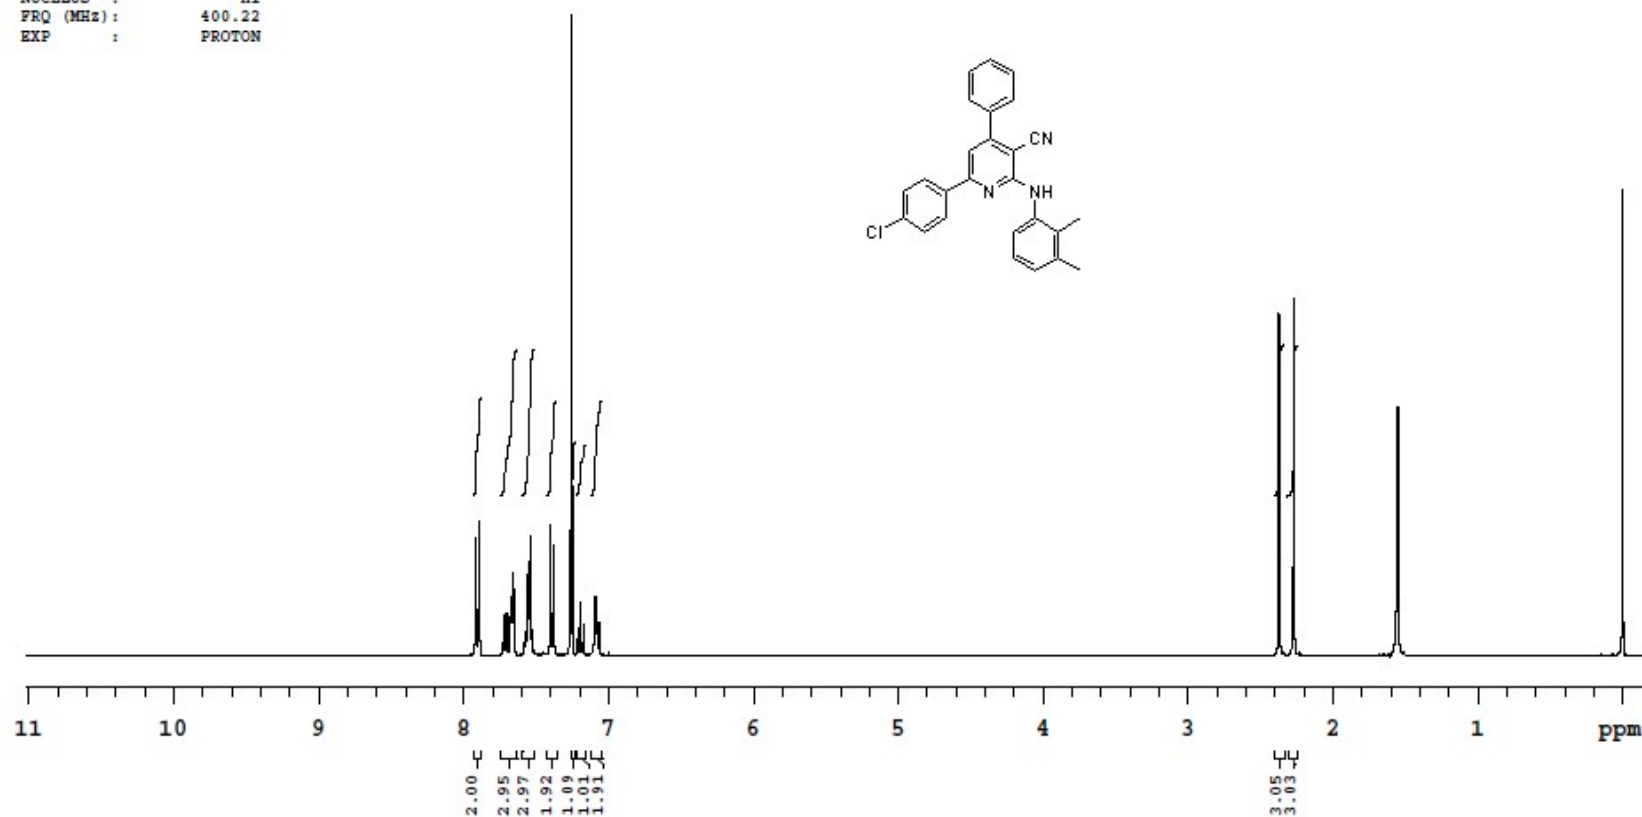

## Elemental Composition Report

### Single Mass Analysis

Tolerance = 5.0 PPM / DBE: min = -1.5, max = 100.0

Element prediction: Off

Number of isotope peaks used for i-FIT = 2

Monoisotopic Mass, Even Electron Ions

54 formula(e) evaluated with 1 results within limits (up to 10 closest results for each mass)

Elements Used:

C: 0-27 H: 0-30 N: 0-5 O: 0-2 Cl: 0-1

C263/MALO1/073 C

151016014 24 (0.440) Cm (23:26)

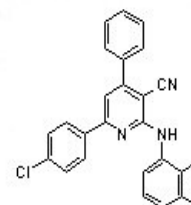

1: TOF MS ES+  
1.24e+005

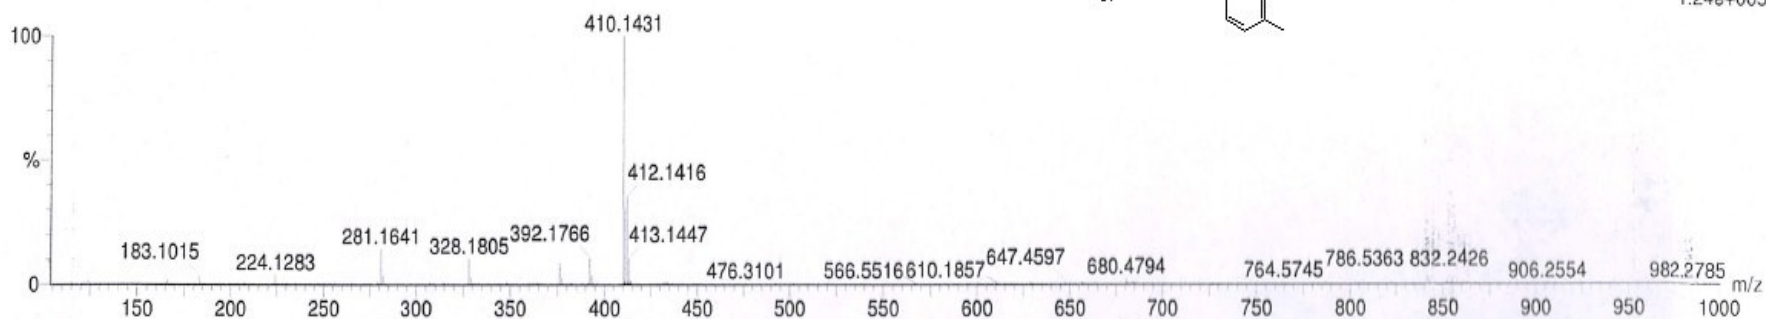

Minimum: -1.5  
Maximum: 5.0 5.0 100.0

| Mass     | Calc. Mass | mDa | PPM | DBE  | i-FIT | Formula       |
|----------|------------|-----|-----|------|-------|---------------|
| 410.1431 | 410.1424   | 0.7 | 1.7 | 17.5 | 4.5   | C26 H21 N3 Cl |

TDC-206 C263/MAL01/073-C

AR.No: ME1015/1392

Analyst : Mallikarjun  
Solvent : cdcl3  
Date : Oct 17 2015  
NUCLEUS : C13  
FRQ (MHz): 100.65  
EXP : CARBON

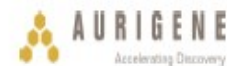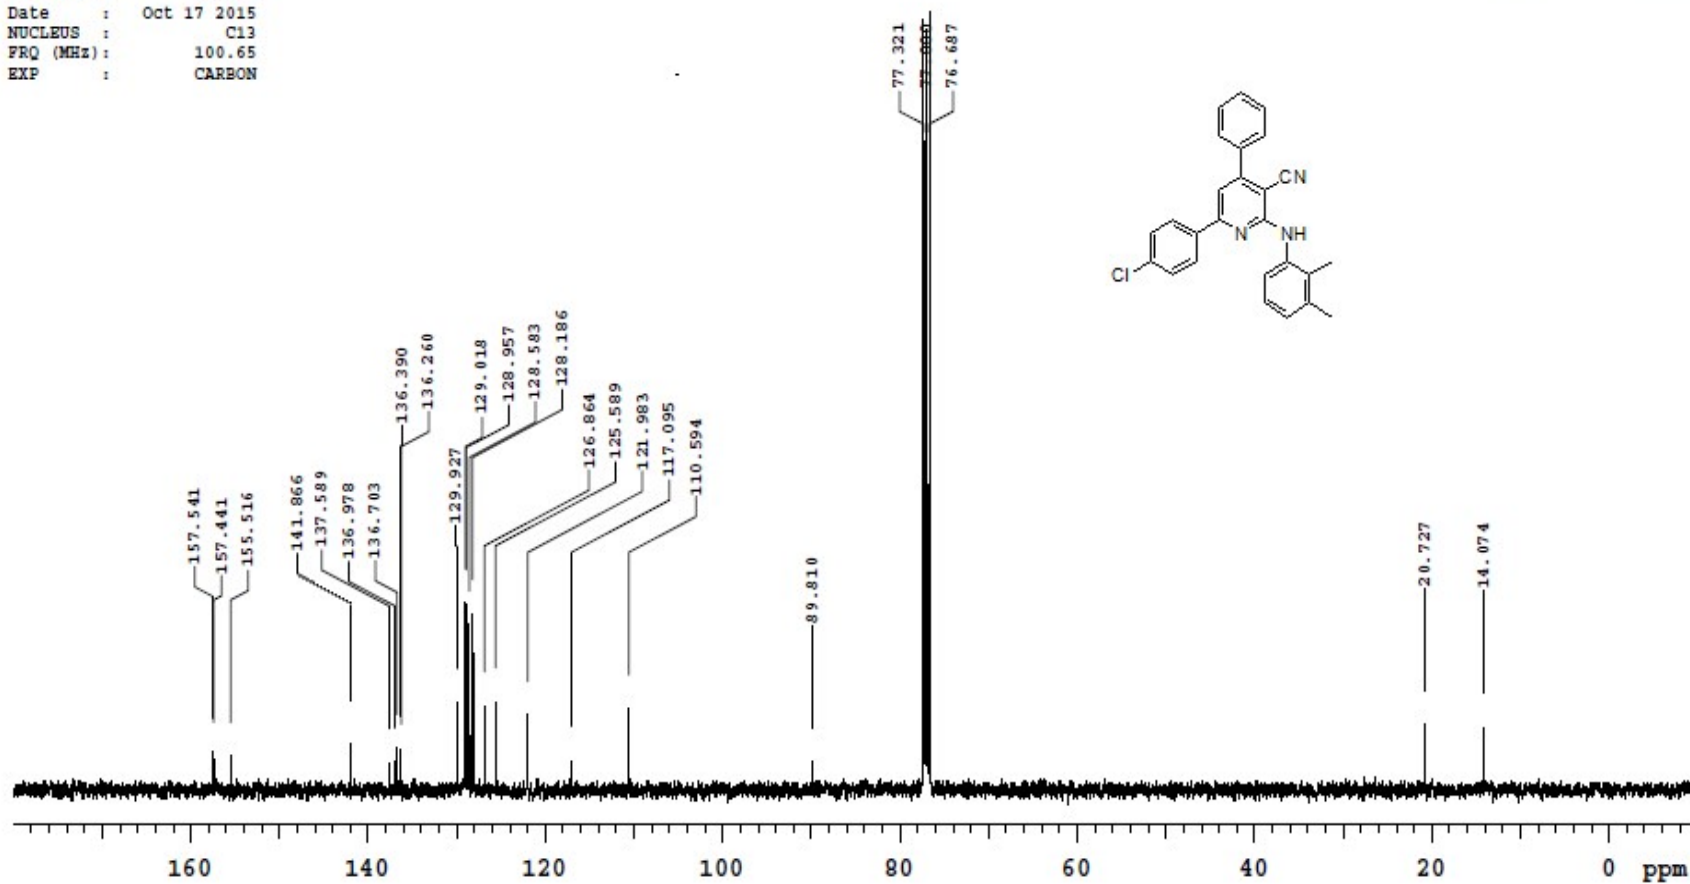

4-(4-Bromophenyl)-6-phenyl-2-(o-tolylamino)nicotinonitrile

TDC-206 C263/MAL01/075(A)

AR.No: ME1015/1130

Analyst : Mallikarjun  
Solvent : cdCl3  
Date : Oct 15 2015  
NUCLEUS : H1  
FRQ (MHz): 400.22  
EXP : PROTON

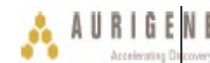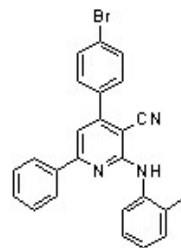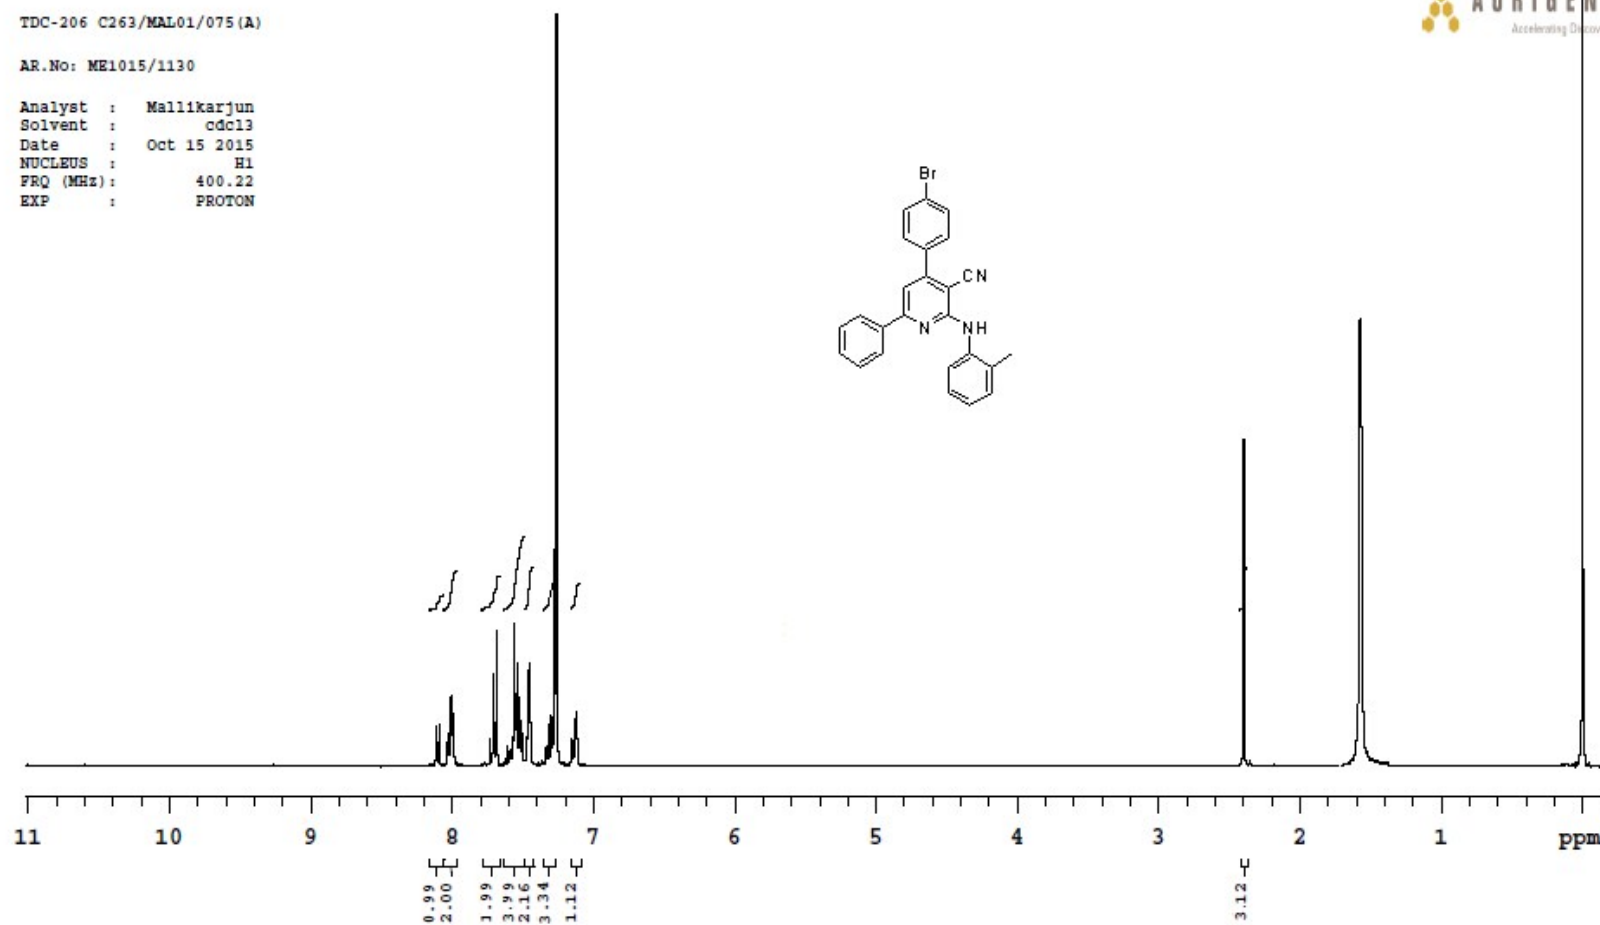



# Elemental Composition Report

## Single Mass Analysis

Tolerance = 5.0 PPM / DBE: min = -1.5, max = 100.0

Element prediction: Off

Number of isotope peaks used for i-FIT = 2

Monoisotopic Mass, Even Electron Ions

68 formula(e) evaluated with 1 results within limits (up to 10 closest results for each mass)

Elements Used:

C: 0-30 H: 0-30 N: 0-5 O: 0-2 Br: 0-1

C263/MALO1/075 A

151119007 21 (0.400) Cm (21:23)

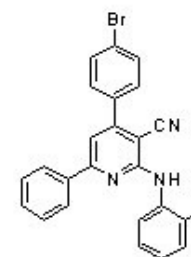

1: TOF MS ES+  
4.14e+004

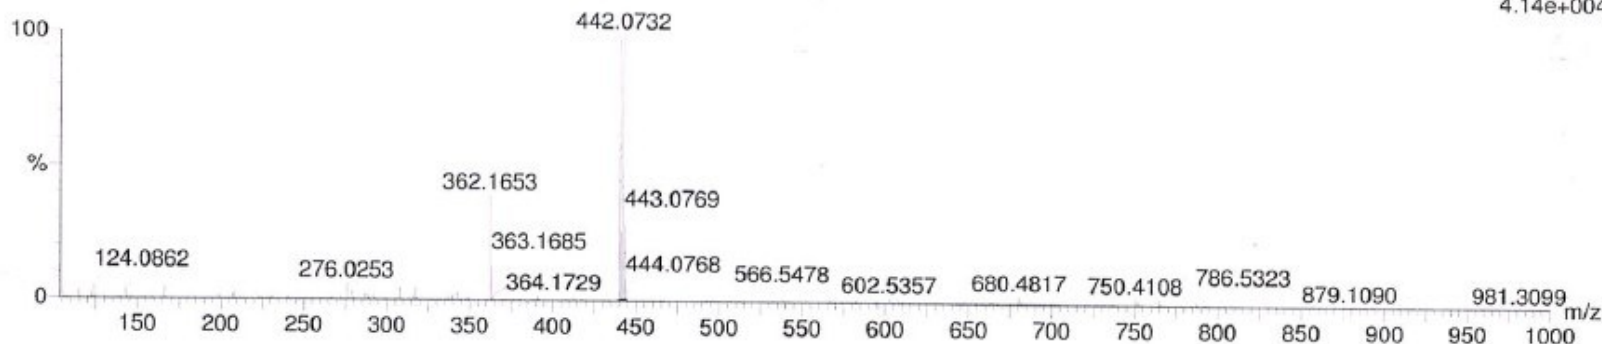

Minimum: -1.5  
Maximum: 5.0 5.0 100.0

| Mass     | Calc. Mass | mDa  | PPM  | DBE  | i-FIT | Formula       |
|----------|------------|------|------|------|-------|---------------|
| 440.0753 | 440.0762   | -0.9 | -2.0 | 17.5 | 39.2  | C25 H19 N3 Br |

TDC-206 C263/MAL01/075-A

A.R.No: ME0216/1474

Analyst : Mallikarjun  
Solvent : cdc13  
Date : Feb 17 2016  
NUCLEUS : C13  
FRQ (MHz): 100.65  
EXP : CARBON

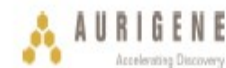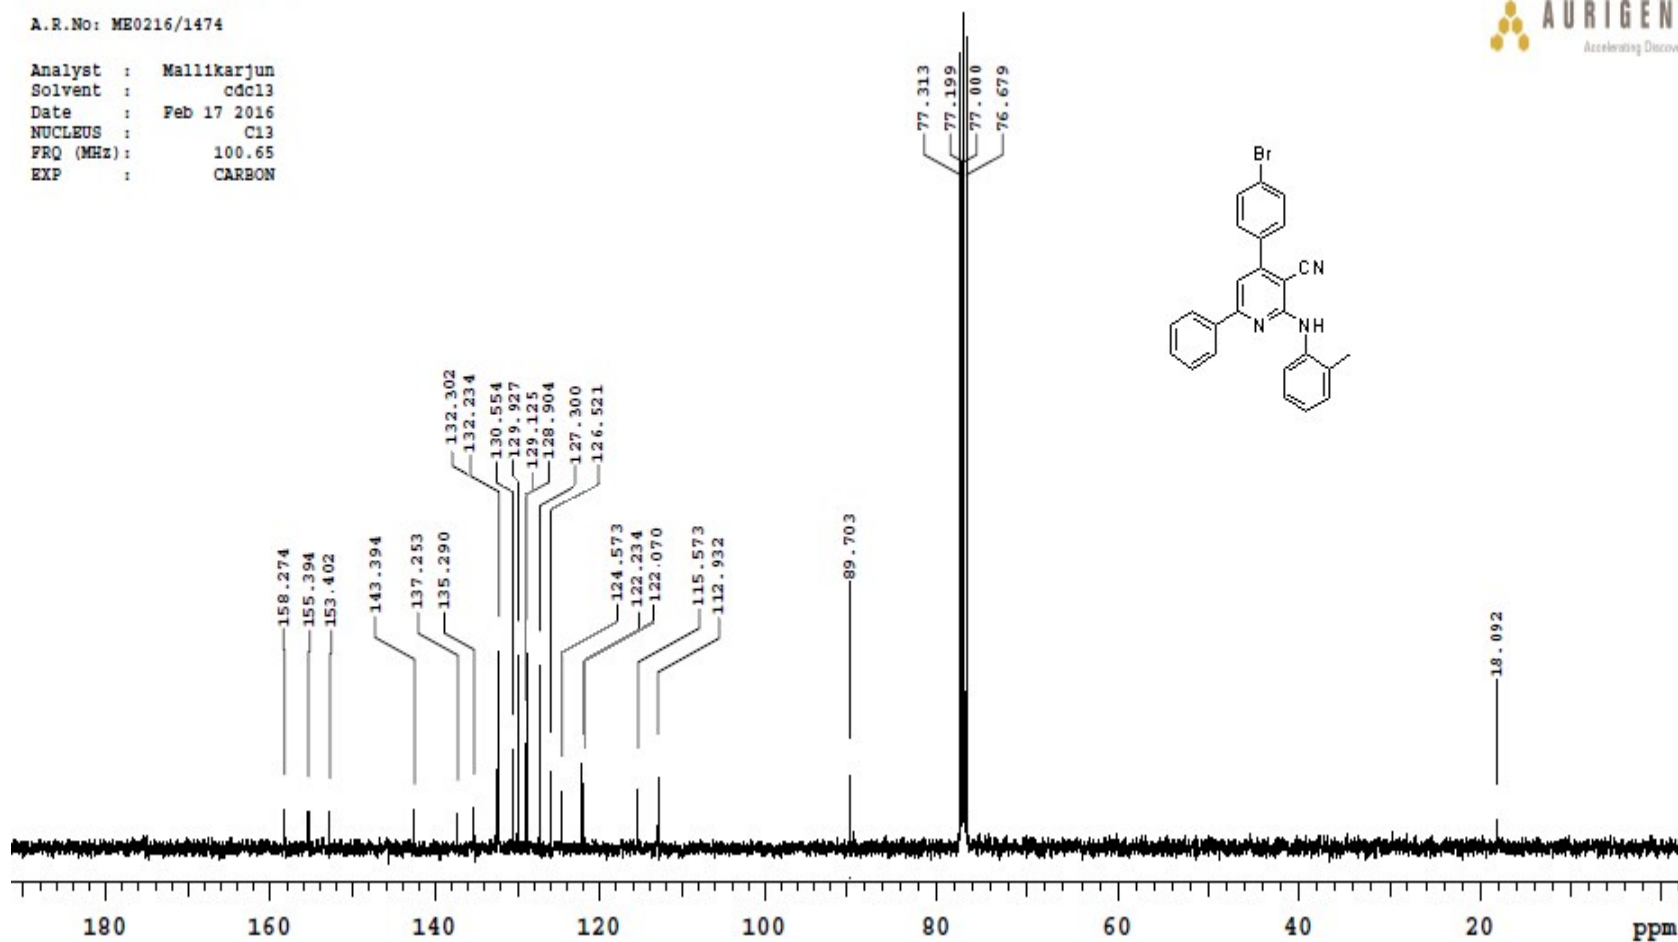

4-(Furan-2-yl)-6-phenyl-2-(o-tolylamino)nicotinonitrile

TDC-206 C138/MAL01/008

AR.No: ME1115/2177

Analyst : Mallikarjun  
Solvent : cdcl3  
Date : Nov 24 2015  
NUCLEUS : H1  
FRQ (MHz): 400.22  
EXP : PROTON

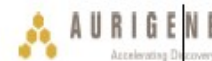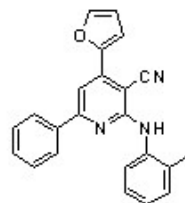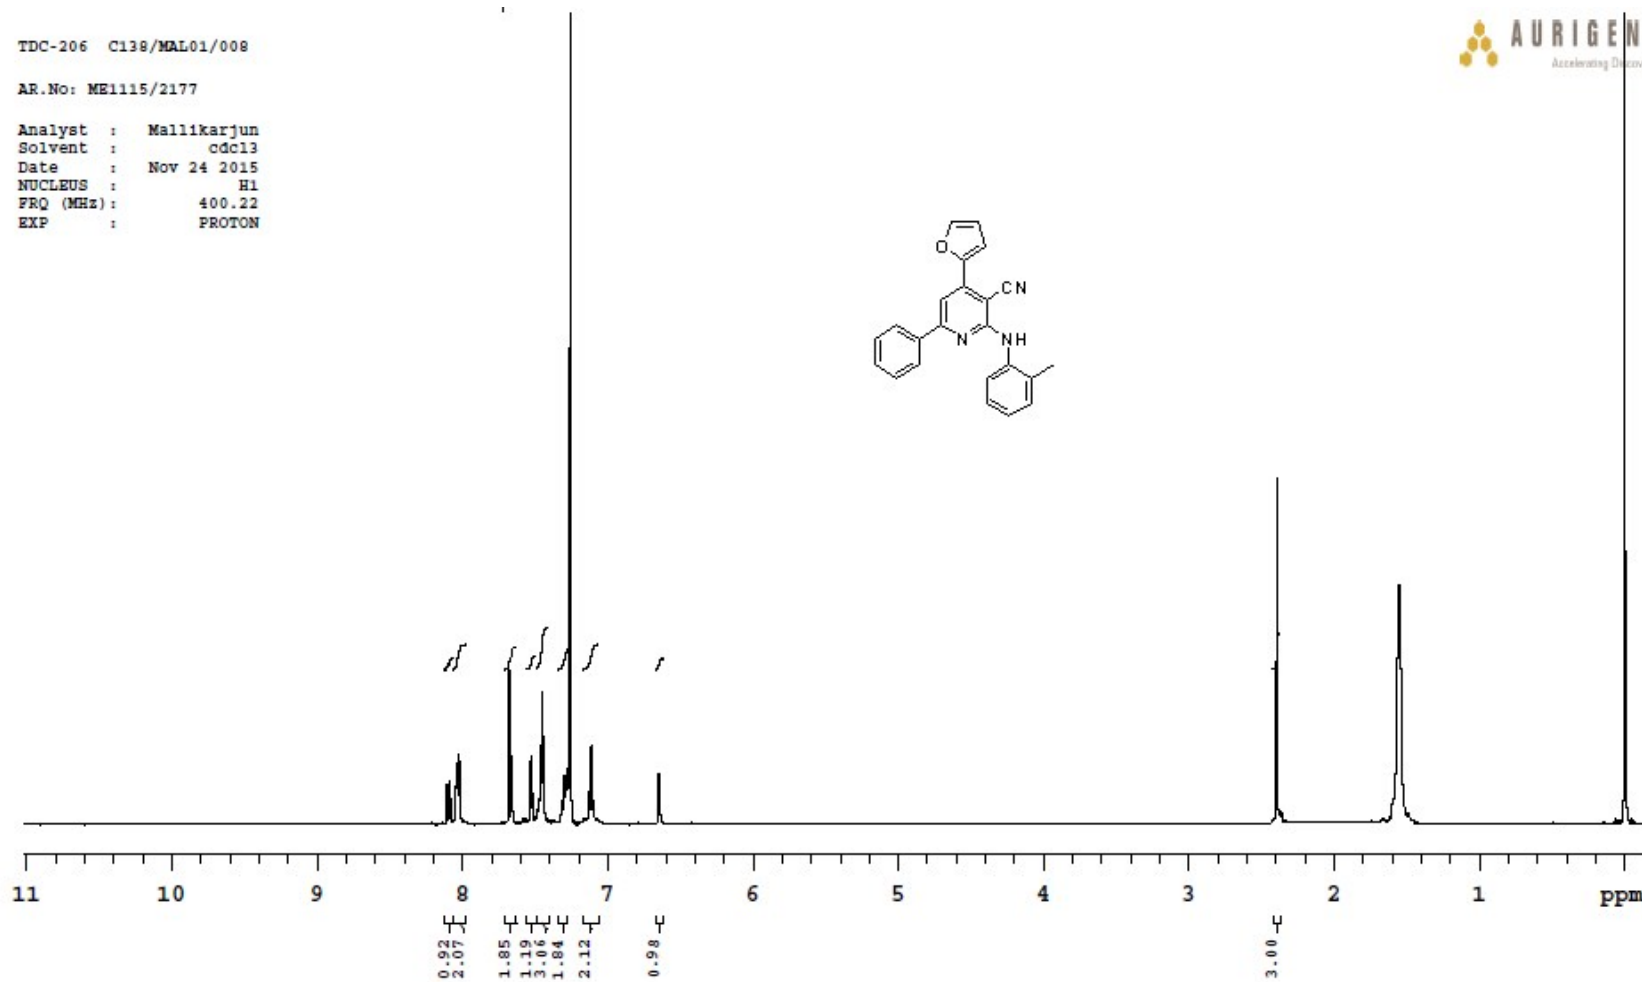

# Elemental Composition Report

## Single Mass Analysis

Tolerance = 20.0 PPM / DBE: min = -1.5, max = 100.0

Element prediction: Off

Number of isotope peaks used for i-FIT = 2

Monoisotopic Mass, Even Electron Ions

42 formula(e) evaluated with 1 results within limits (all results (up to 1000) for each mass)

Elements Used:

C: 0-30 H: 0-23 N: 0-6 O: 0-2

C138/MALO1/008

160122004 28 (0.514) Cm (27:28-49:52x0.500)

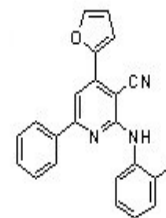

1: TOF MS ES+  
2.94e+002

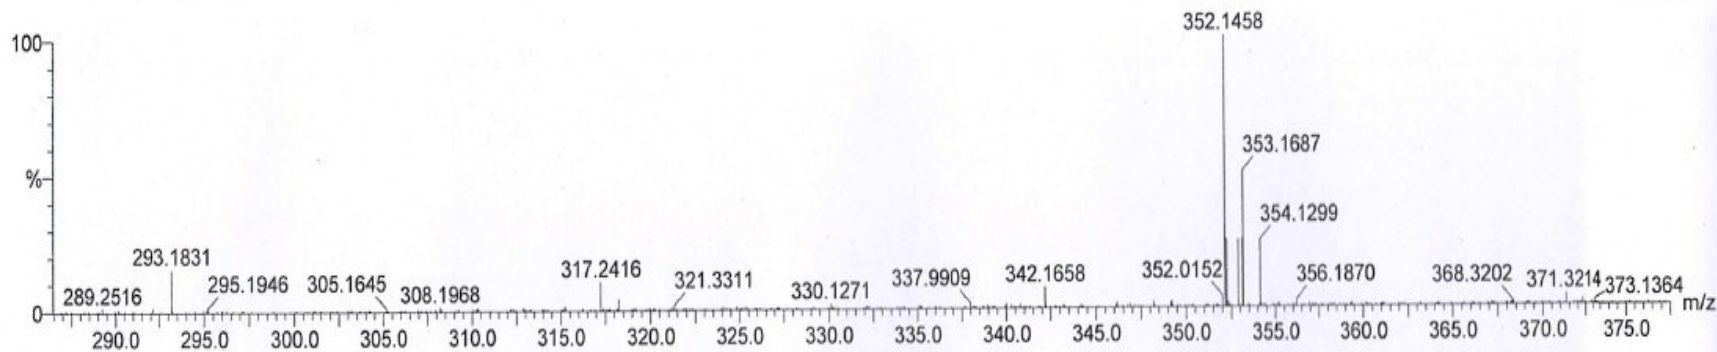

Minimum: -1.5  
Maximum: 5.0 20.0 100.0

| Mass     | Calc. Mass | mDa | PPM | DBE  | i-FIT | Formula      |
|----------|------------|-----|-----|------|-------|--------------|
| 352.1458 | 352.1450   | 0.8 | 2.3 | 16.5 | 21.8  | C23 H18 N3 O |

TDC-206 C138-MAL01-008

AR.No: ME1215/2428

Analyst : Mallikarjun  
Solvent : cdcl3  
Date : Dec 25 2015  
NUCLEUS : C13  
FRQ (MHz): 100.65  
EXP : CARBON

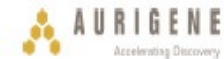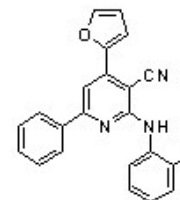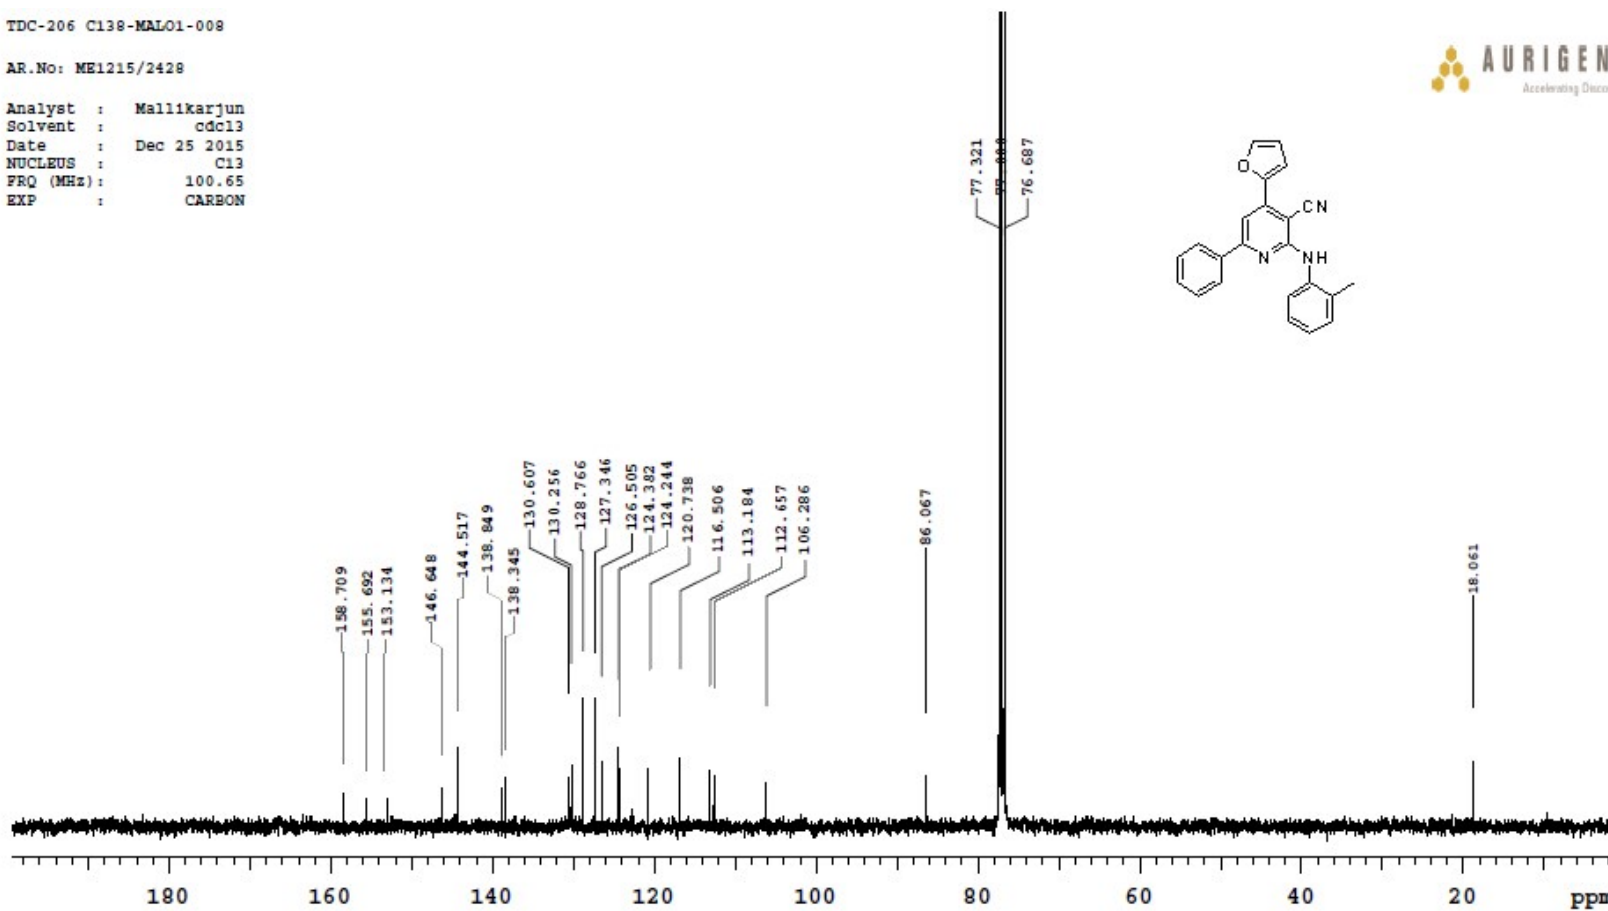

6-(4-Cyanophenyl)-2-((2,3-dimethylphenyl)amino)-4-phenylnicotinonitrile

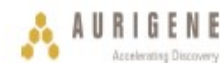

TDC-106 C138/MAL01/008 B

AR.No: ME1115/2246

Analyst : Mallikarjun  
Solvent : cdcl3  
Date : Nov 25 2015  
NUCLEUS : H1  
FRQ (MHz): 400.22  
EXP : PROTON

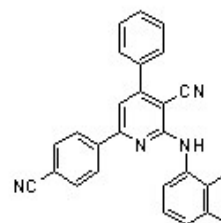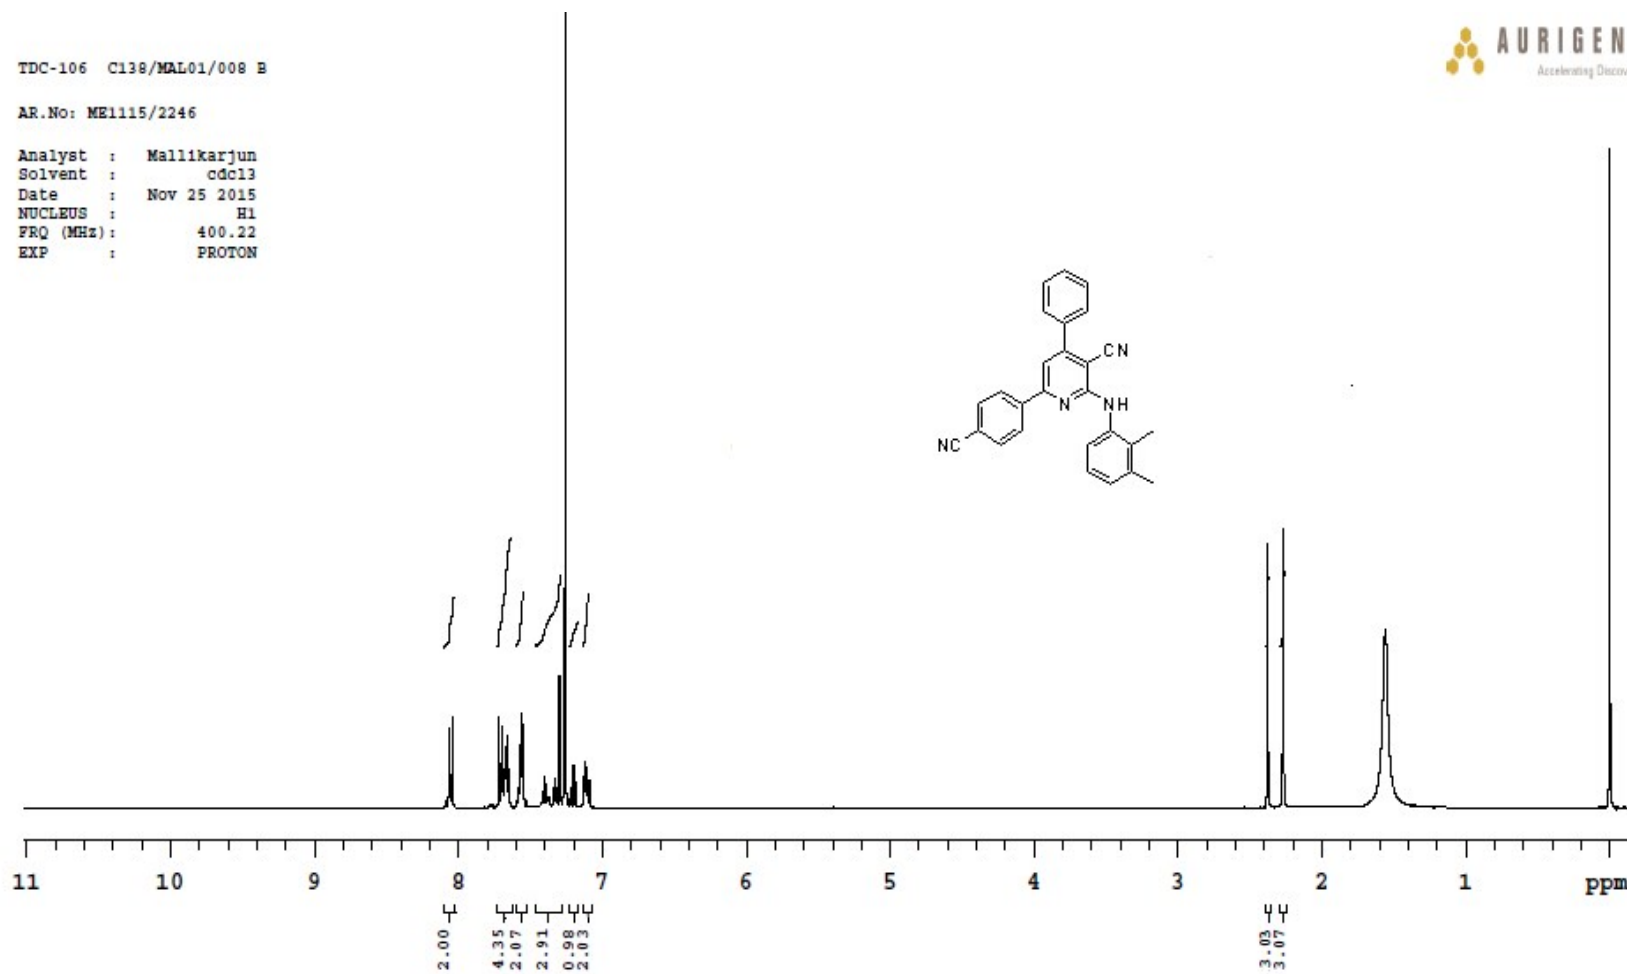

## Elemental Composition Report

### Single Mass Analysis

Tolerance = 5.0 PPM / DBE: min = -1.5, max = 100.0

Element prediction: Off

Number of isotope peaks used for i-FIT = 2

Monoisotopic Mass, Even Electron Ions

44 formula(e) evaluated with 1 results within limits (all results (up to 1000) for each mass)

Elements Used:

C: 0-30 H: 0-25 N: 0-6 S: 0-2

C13B/MALO1/008 B

160122005 43 (0.796) Cm (43:47-69:73x0.500)

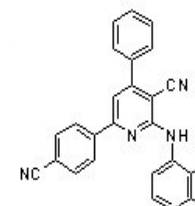

1: TOF MS ES+  
8.45e+002

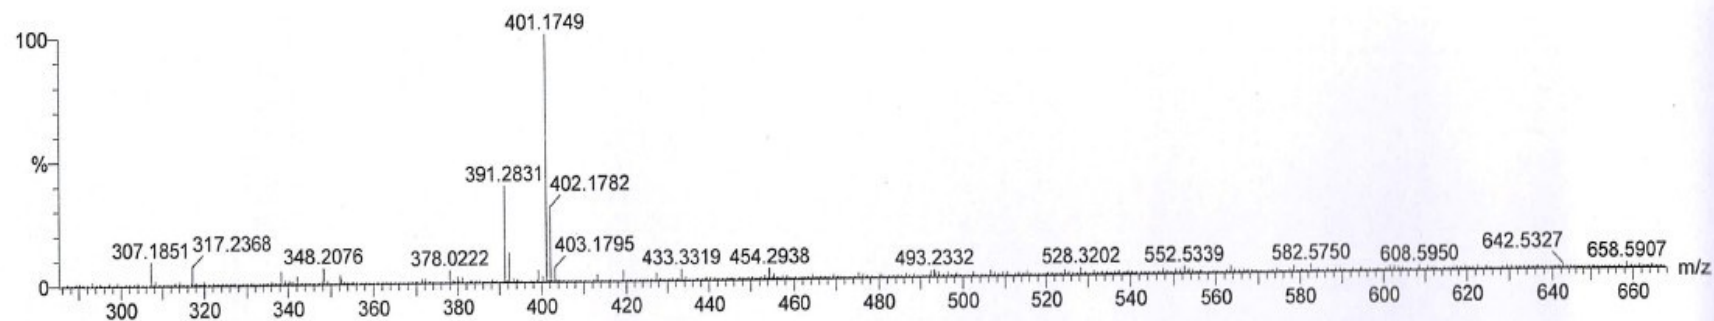

Minimum: -1.5  
Maximum: 5.0 5.0 100.0

| Mass     | Calc. Mass | mDa  | PPM  | DBE  | i-FIT | Formula    |
|----------|------------|------|------|------|-------|------------|
| 401.1749 | 401.1766   | -1.7 | -4.2 | 19.5 | 0.3   | C27 H21 N4 |

TDC-206 C138/MAL01/008(B)

AR.No: ME1215/1866

Analyst : Mallikarjun  
Solvent : cdcl3  
Date : Dec 19 2015  
NUCLEUS : C13  
FRQ (MHz): 100.65  
EXP : CARBON

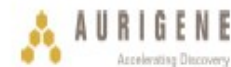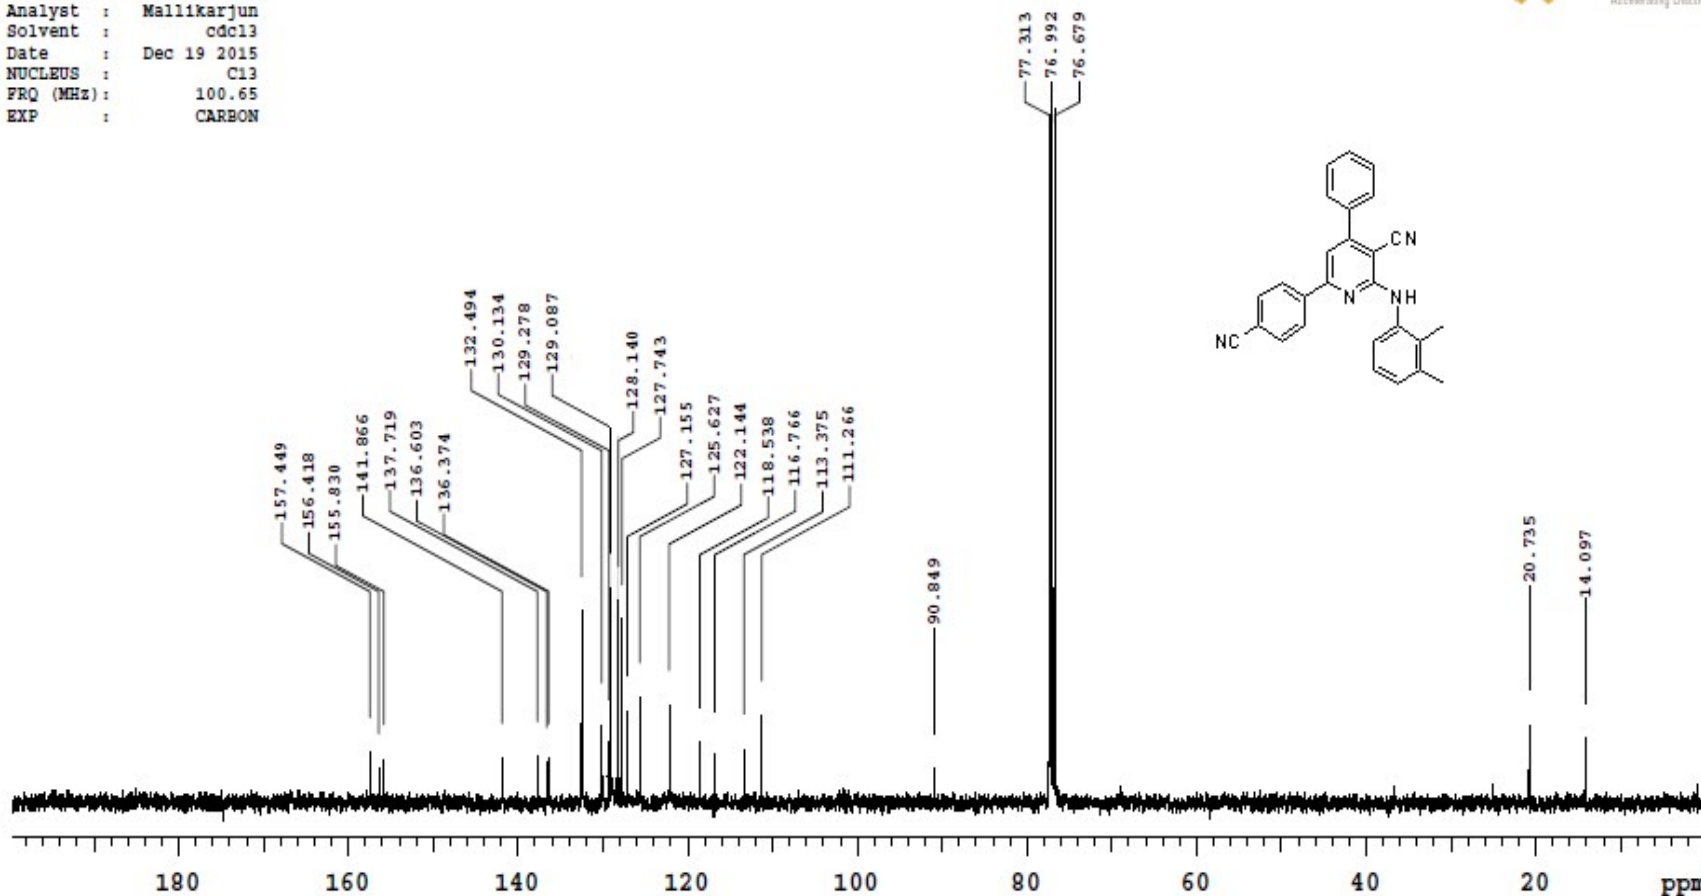



2-((2,3-Dimethylphenyl)amino)-6-phenyl-4-propylnicotinonitrile

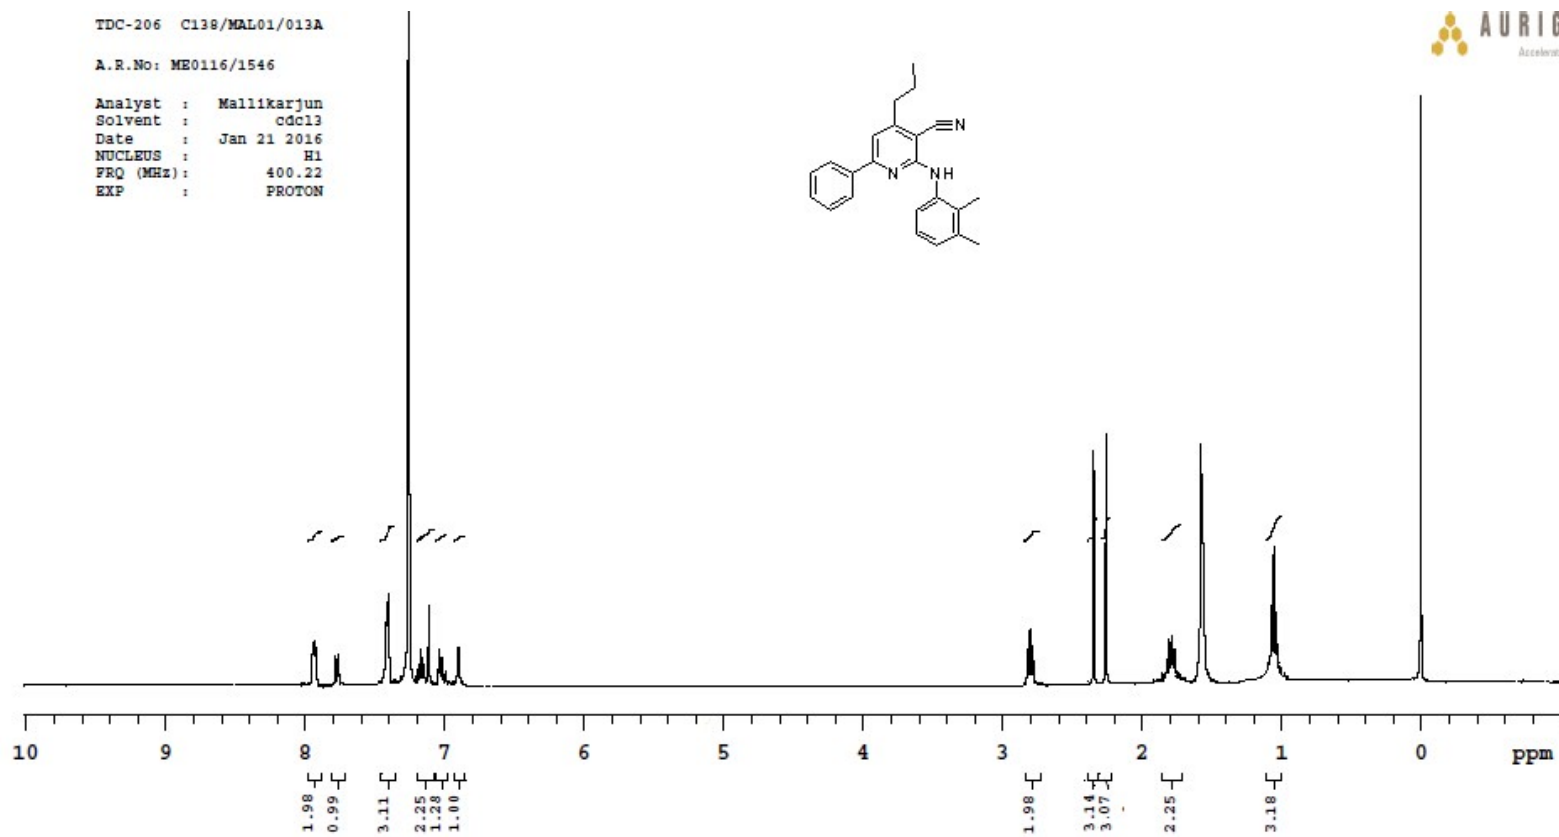

## Elemental Composition Report

### Single Mass Analysis

Tolerance = 5.0 PPM / DBE: min = -1.5, max = 100.0

Element prediction: Off

Number of isotope peaks used for i-FIT = 2

Monoisotopic Mass, Even Electron Ions

10 formula(e) evaluated with 1 results within limits (all results (up to 1000) for each mass)

Elements Used:

C: 0-26 H: 0-25 N: 0-5

C138/MALO/013(A)

160324005 88 (1.617) Cm (87:93-101:104x0.500)

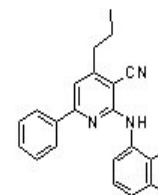

1: TOF MS ES+  
2.25e+004

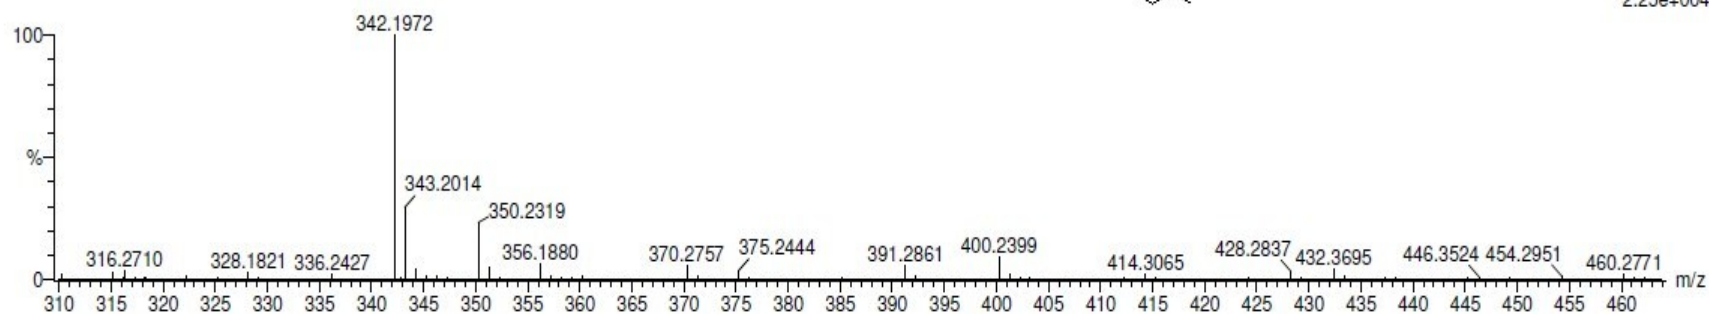

Minimum: -1.5  
Maximum: 5.0 5.0 100.0

| Mass     | Calc. Mass | mDa | PPM | DBE  | i-FIT | Formula    |
|----------|------------|-----|-----|------|-------|------------|
| 342.1972 | 342.1970   | 0.2 | 0.6 | 13.5 | 17.1  | C23 H24 N3 |

TDC-206 C139/MAL01/013A

A.R.No: ME0216/1202

Analyst : Mallikarjun  
Solvent : cdcl3  
Date : Feb 13 2016  
NUCLEUS : C13  
FRQ (MHz): 100.65  
EXP : CARB<sup>13</sup>

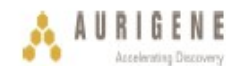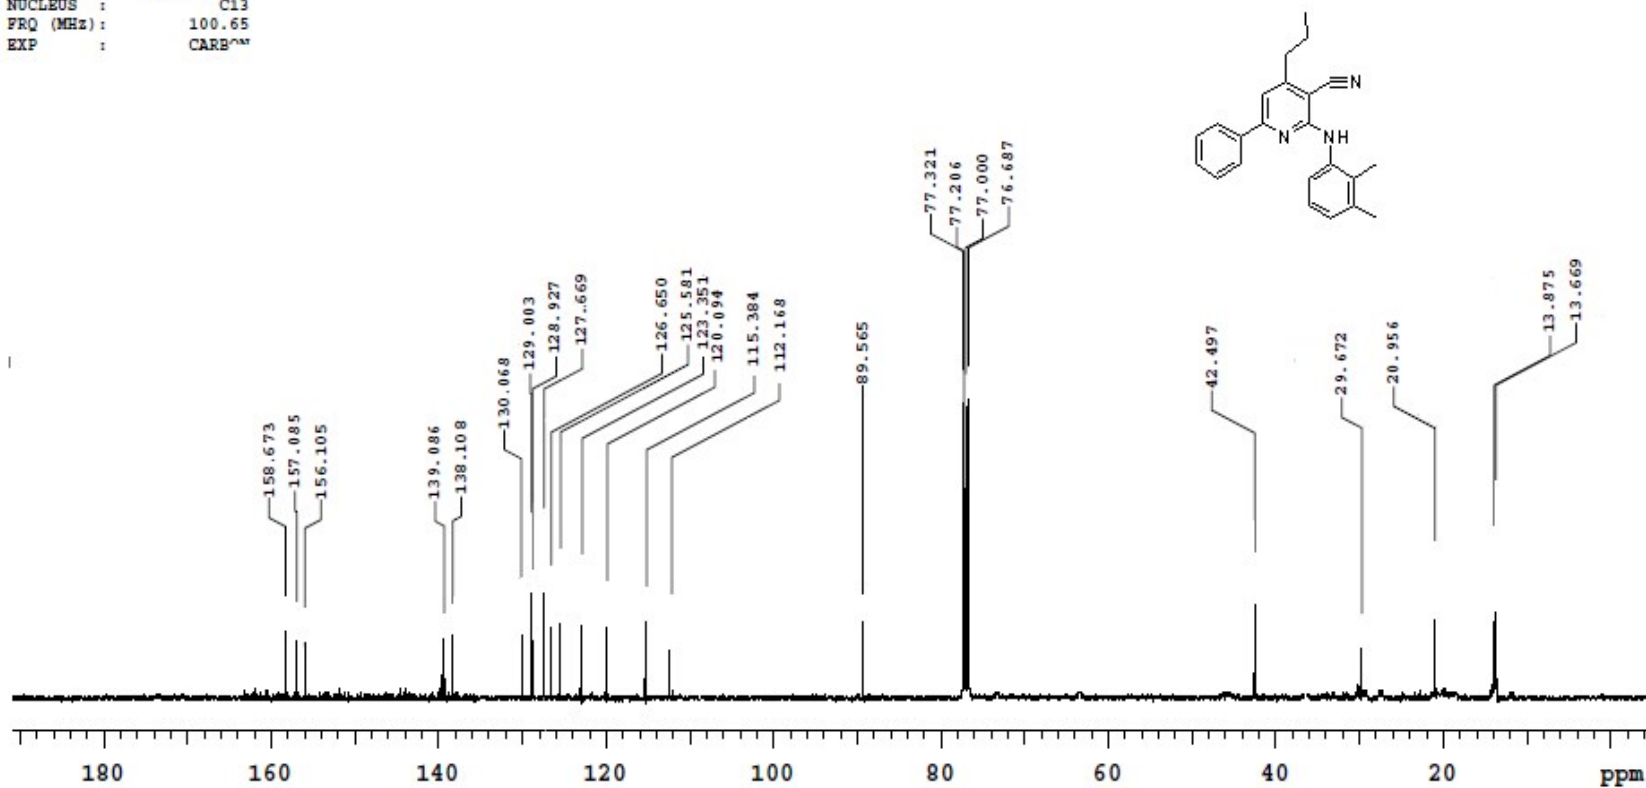

C138/MAL01/033 (A)  
1H-NMR\CDC13  
01-07-2016  
ANALYSED BY : KRP

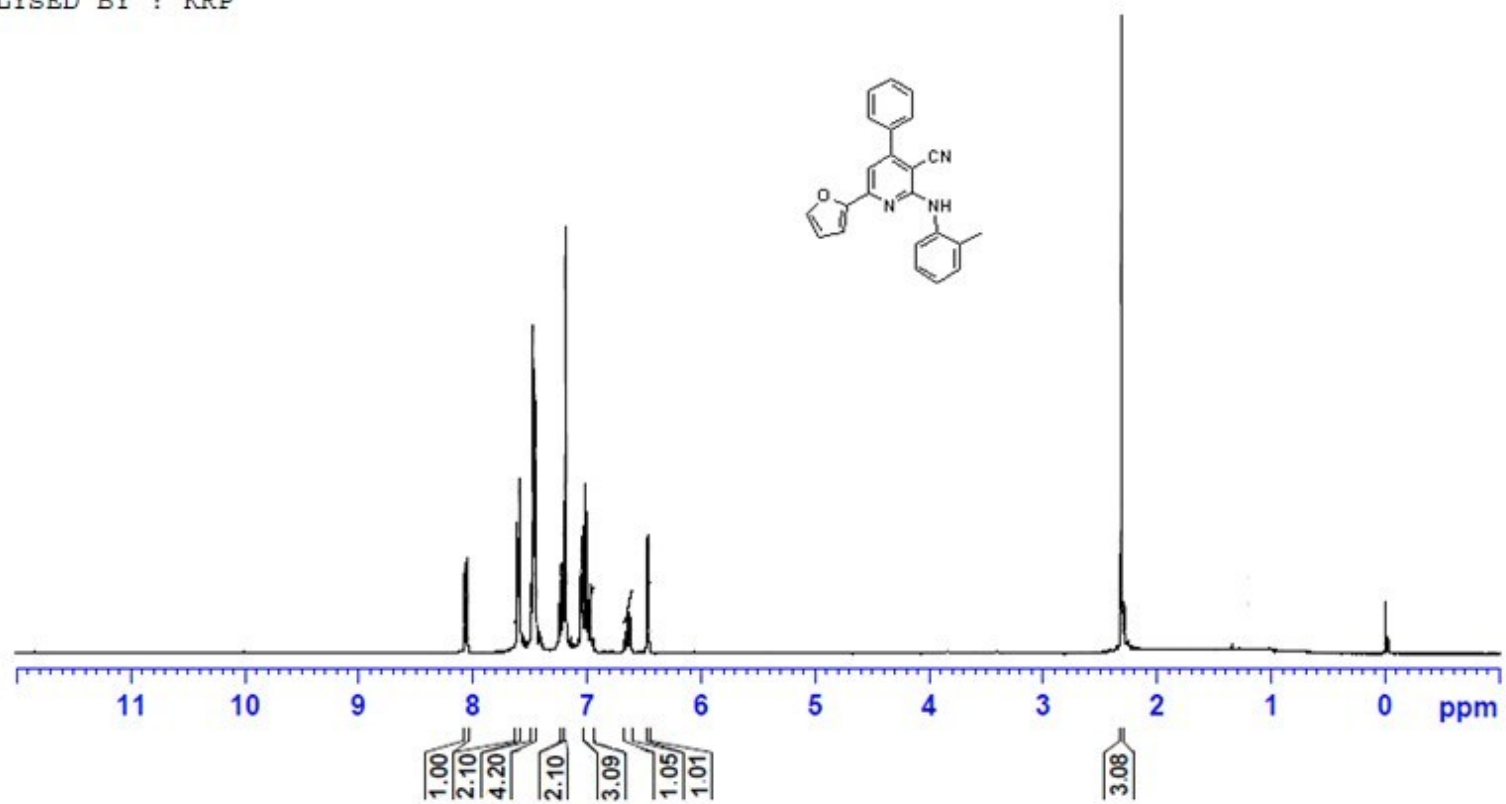

|                        |              |                               |                  |
|------------------------|--------------|-------------------------------|------------------|
| <b>Data Filename</b>   | 160630003.d  | <b>Sample Name</b>            | C138/MALO1/033 A |
| <b>Sample Type</b>     | Sample       | <b>Position</b>               | Vial 65          |
| <b>Instrument Name</b> | Instrument 1 | <b>User Name</b>              |                  |
| <b>Acq Method</b>      | ESI.m        | <b>IRM Calibration Status</b> | Success          |
| <b>DA Method</b>       | CACH8.m      | <b>Comment</b>                |                  |

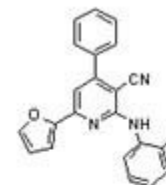

### User Spectra

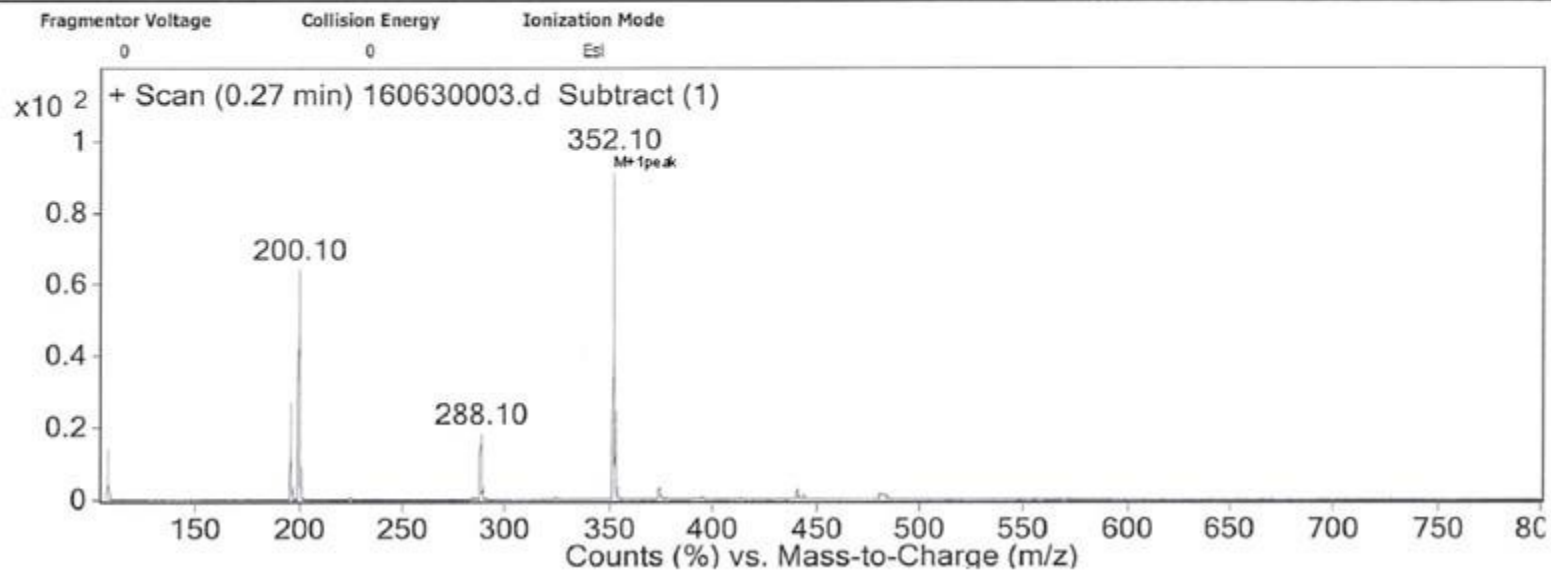

C138/MAL01/033 (A)  
13C-NMR\CDC13  
01-07-2016  
ANALYSED BY : KRP

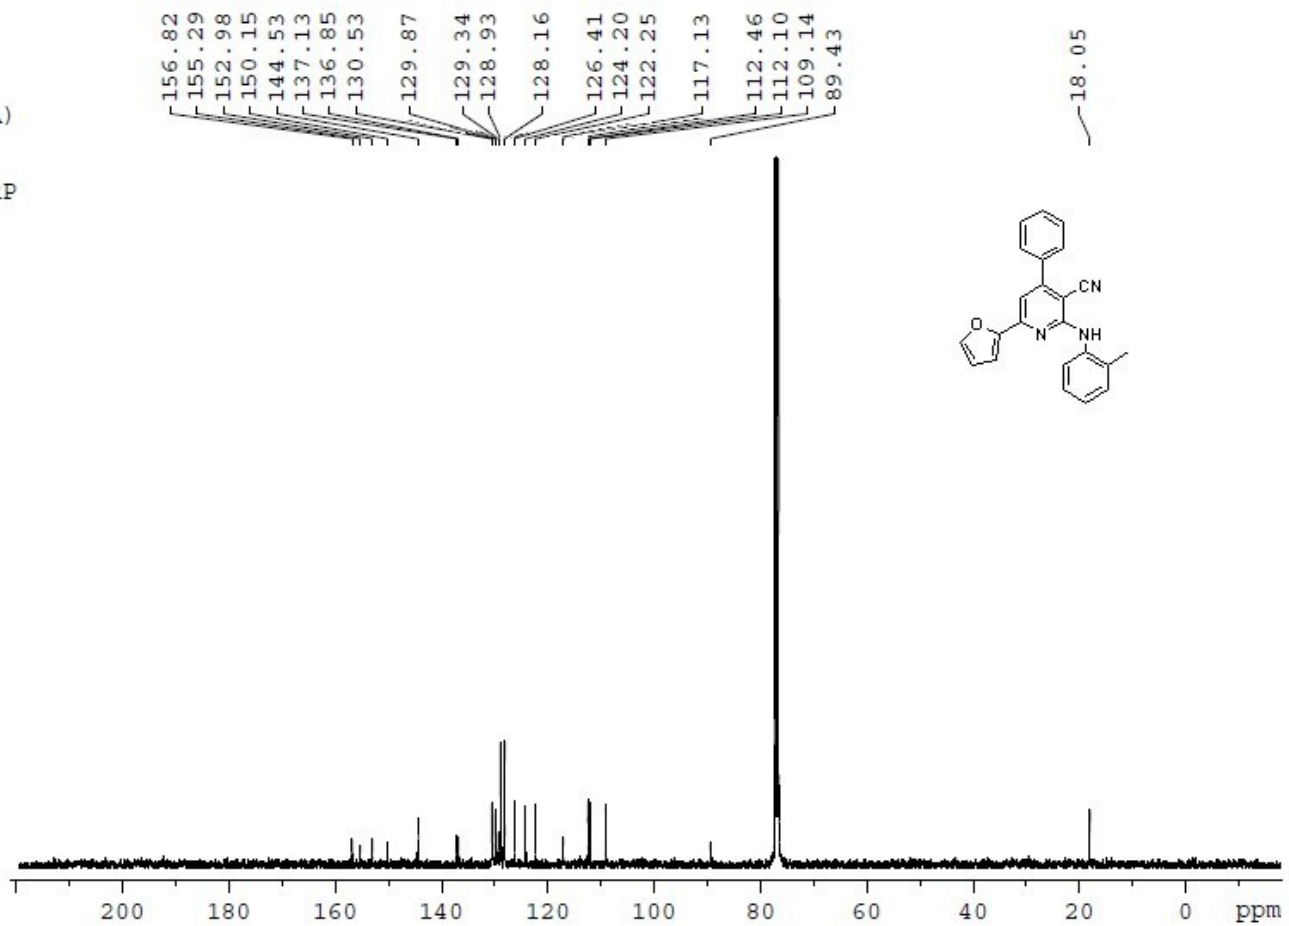

$^1\text{H}$ NMR spectra of compound **6** (Table 1) in  $\text{CDCl}_3$

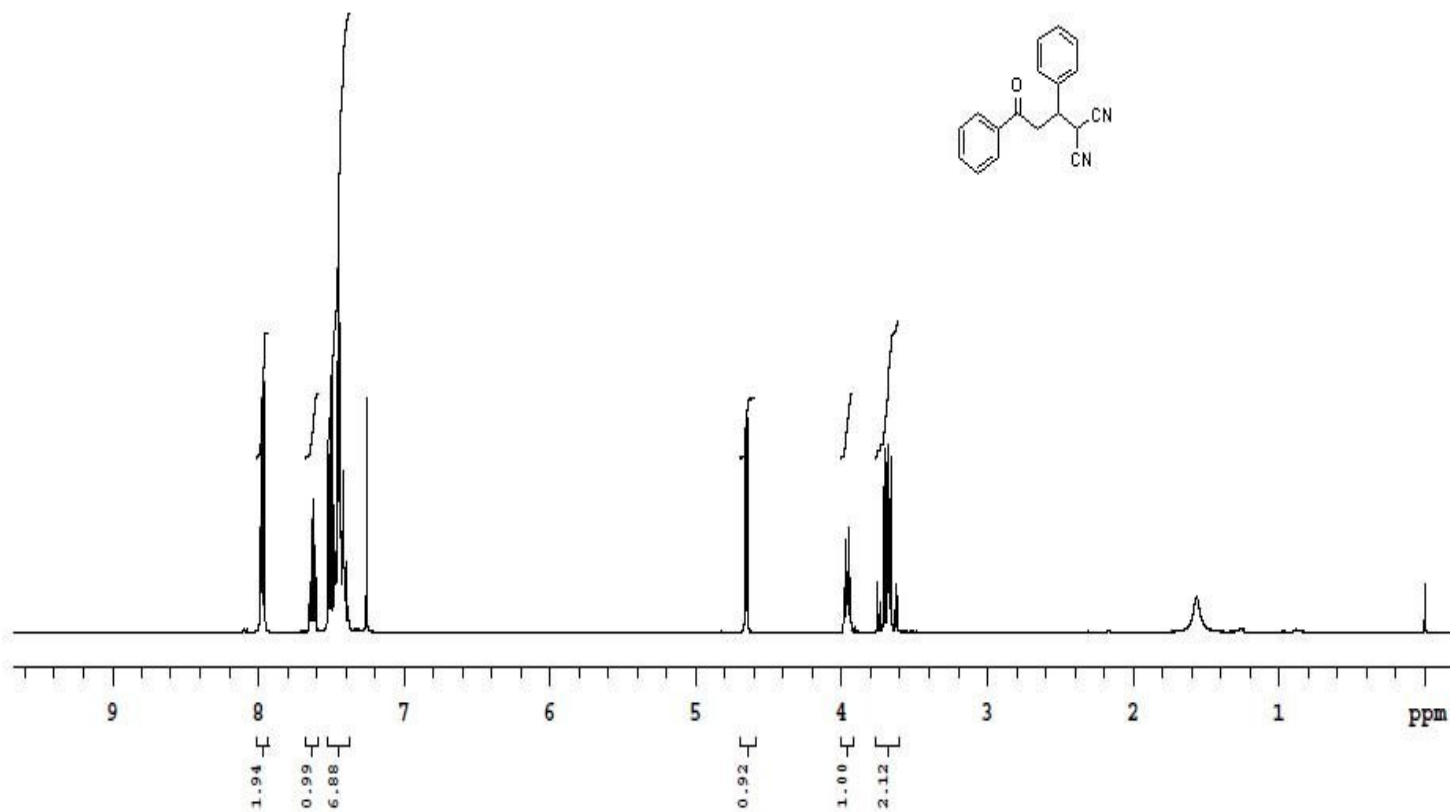

## Mass Analysis Report

|                 |              |                        |                    |
|-----------------|--------------|------------------------|--------------------|
| Data Filename   | 160517003.d  | Sample Name            | C263/MAL01/056 Int |
| Sample Type     | Sample       | Position               | Vial 43            |
| Instrument Name | Instrument 1 | User Name              |                    |
| Acq Method      | ESI.m        | IRM Calibration Status | Success            |
| DA Method       | CACH8.m      | Comment                |                    |

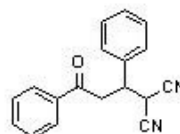

## User Spectra

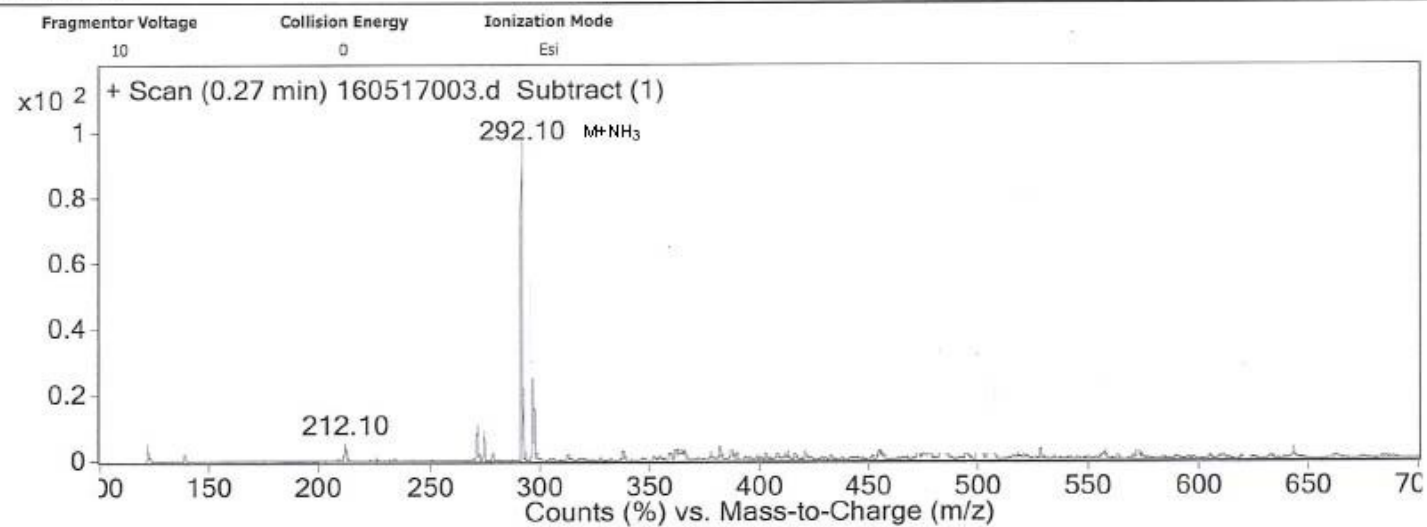



$^1\text{H}$ NMR spectra of compound **7** in  $\text{CDCl}_3$

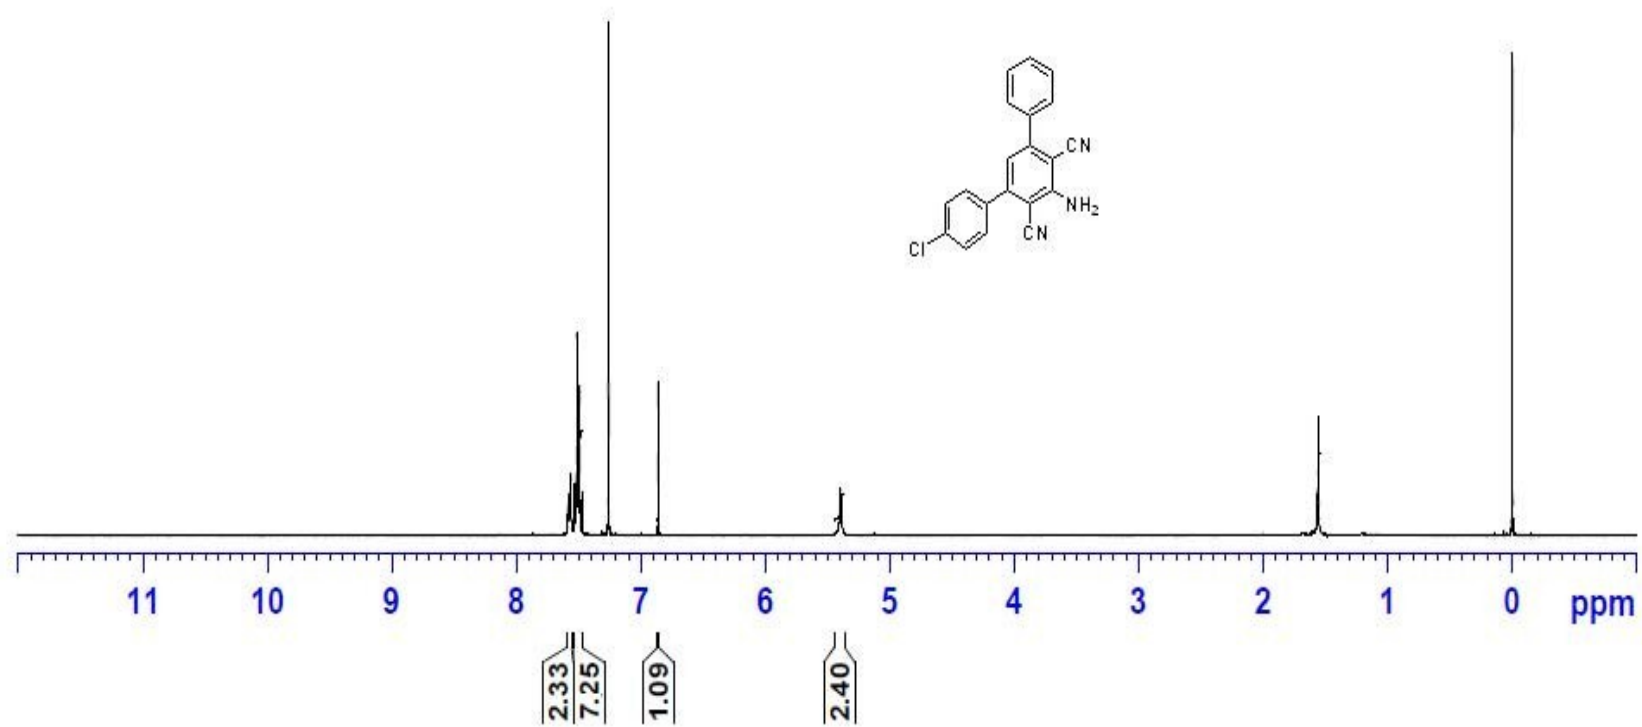

$^1\text{H}$ NMR spectra of compound **8** in  $\text{CDCl}_3$

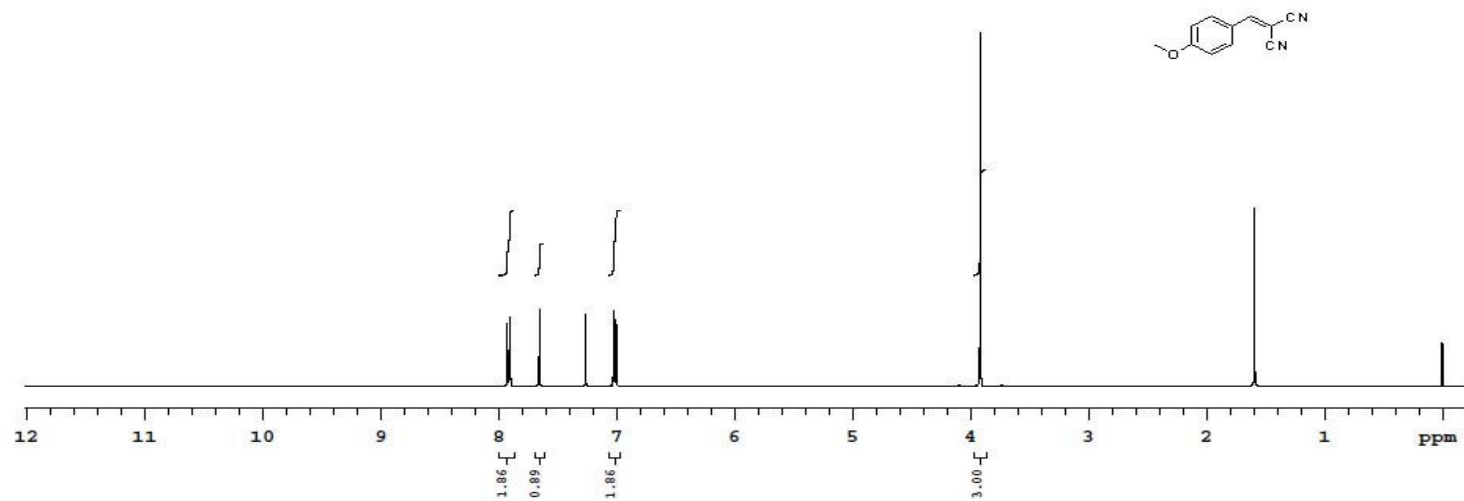

## IR spectra of recovered and fresh FeF<sub>3</sub> catalyst

### DR.REDDY'S LABORATORIES LIMITED,CPS Analytical Research Department

#### Sample Report

Numbers of Scans:  
Resolution:  
Spectra path name:  
Date created:

16  
4  
D:\IR DATA\MAY-2016\RECOVERED FeF3.sp  
5/27/2016 6:37:39 PM

#### Compare Result

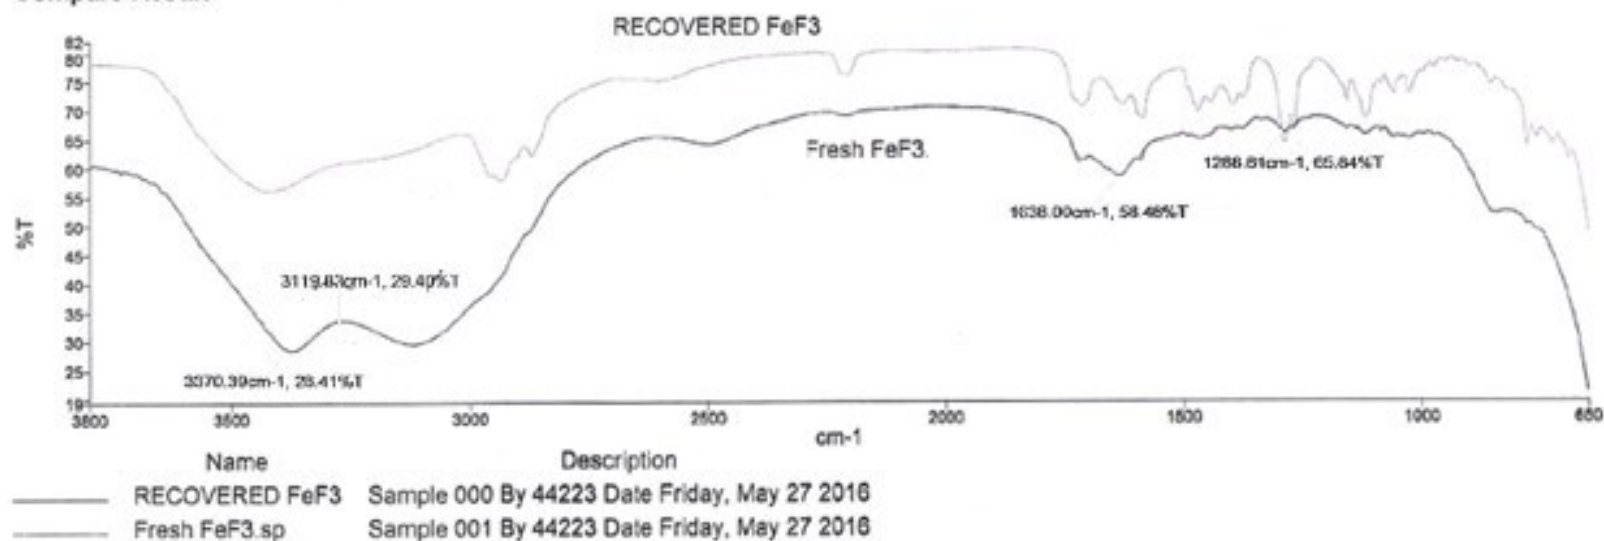

Supplement: c6ra14228a1.pdf [file c6ra14228a1.pdf]
